# Supplementary material for: Caerin 1.1/1.9 Enhances Antitumour Immunity by Activating the IFN-α Response Signalling Pathway of Tumour Macrophages
Source: MDPI journal article supplement (doi:10.3390/cancers14235785), 2022-11-24
Supplement: s1 [file s1]

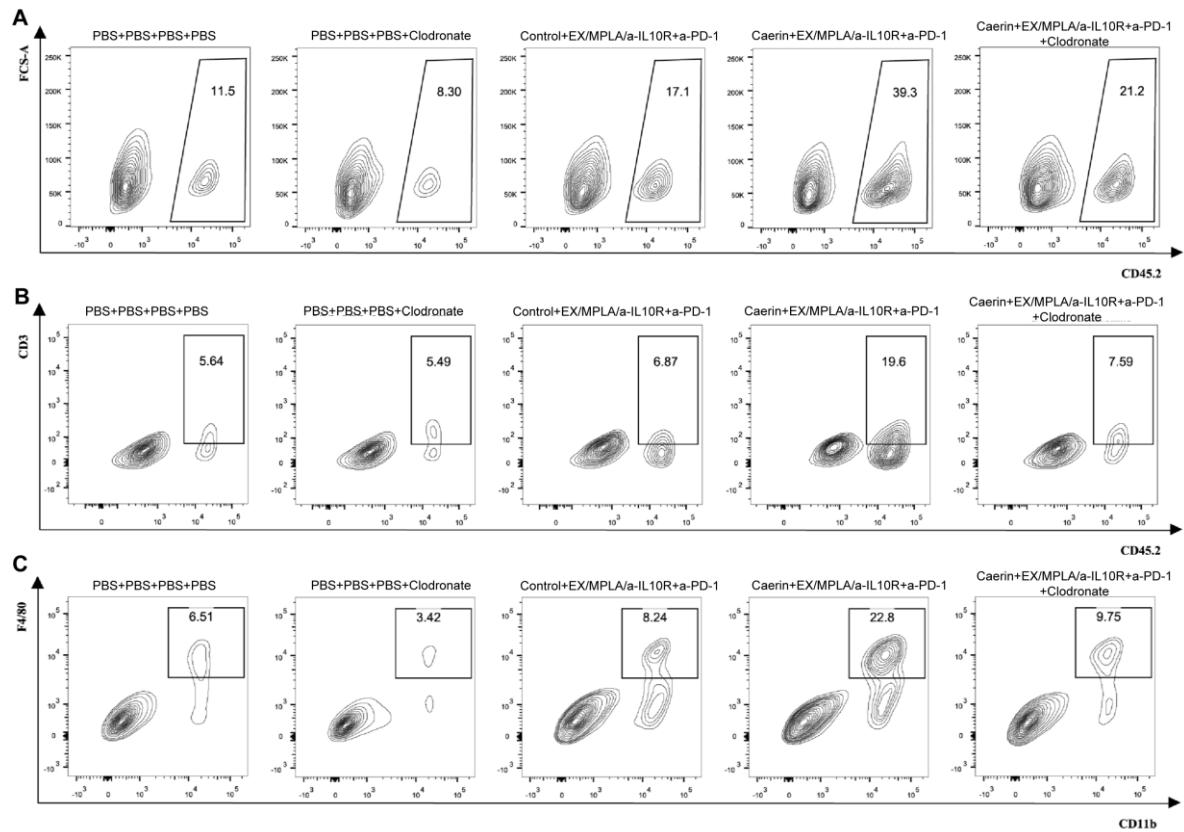

**Figure S1.** The tumours were dissected from the mice, digested into single-cell suspension and stained for analysis by flow cytometry. (A) The flow cytometric graphs of tumour infiltrating macrophages (CD45+CD11b+F4/80+), (B) The flow cytometric graphs of lymphocyte (CD45.2+) and (C) The flow cytometric graphs T cells (CD3+).



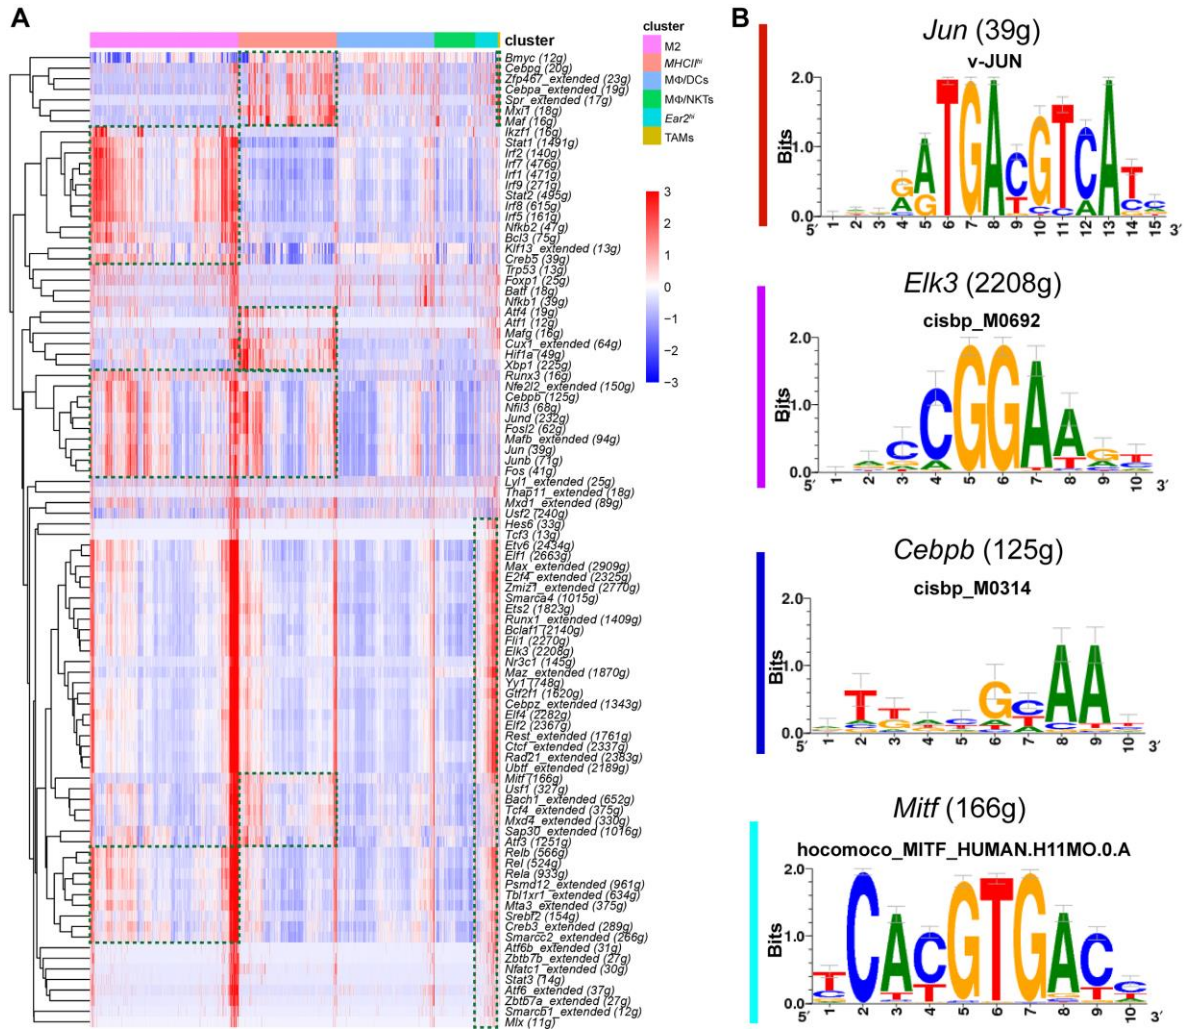

**Figure S3.** The regulation of MΦ populations in the triple therapy. (A) SCENIC analysis of the MΦs in the TME; differential regulators are circled. (B) The corresponding enriched DNA-binding motifs are shown (Logo); the regulators are colour matched with the TFs in Figure 4A.
