# Supplementary material for: Caerin 1.1/1.9 Enhances Antitumour Immunity by Activating the IFN-α Response Signalling Pathway of Tumour Macrophages
Source: Cancers (Basel). 2022 Nov 24;14(23):5785. doi: 10.3390/cancers14235785 (PMC9738106; doi:10.3390/cancers14235785)
Supplement: Supplementary file 1 [file cancers-14-05785-s001.zip]

Archive with 8 entries (8 files):
- cancers-2005308-supplementary.pdf
- Figure S1.tif
- Figure S2.tif
- Figure S3.tif
- Figure S4.tif
- Table S1 Flow cytometry.xlsx
- Table S2 ELISA.xlsx
- Table S3 qPCR&survival.xlsx
