# Supplementary material for: Caerin 1.1/1.9 Enhances Antitumour Immunity by Activating the IFN-α Response Signalling Pathway of Tumour Macrophages
Source: Cancers (Basel). 2022 Nov 24;14(23):5785. doi: 10.3390/cancers14235785 (PMC9738106; doi:10.3390/cancers14235785)
Supplement: Supplementary file 1 [file cancers-14-05785-s001.zip › Table S1 Flow cytometry.xlsx]

## Sheet: Figure 1B
	Name	Statistic	#Cells			F=Caerin	P3=Control
	8se_F(1)_019.fcs		500000				PBS(1)	PBS(2)	PBS(3)	PBS(4)	F(1)	F(2)	F(3)	F(4)	P3(1)	P3(2)	P3(3)	P3(4)
>	tumor	95.1	475523			tumor	90.8	89.5	89.5	89.2	95.1	89.4	92.7	98	96.1	92.1	95.2	96
> >	Single cell	91.8	436370			Single cell	98.4	98.6	98.7	98.4	91.8	98.1	98.5	98.8	98.5	98.5	98.4	98.2
> > >	Live	63.8	278605			Live	36.2	29.8	33.4	26.3	63.8	45.7	66.1	90.3	75.3	53.4	74	78.7
> > > >	CD45.2+	23.5	65412			CD45.2+	8.25	10.6	9.15	11.3	23.5	16.1	16.3	12.9	7.06	10.9	12.5	12.6
> > > >	CD45.2+&CD3-	17.5	48753			CD45.2+&CD3-	6.8	8.24	7.15	8.45	17.5	11.5	12.3	8.73	5.57	8.15	9.91	9.37
> > > > >	CD11b+	68.3	33285			CD11b+	97.9	98	97.8	97.1	68.3	95.6	94.3	90.4	92.8	94.6	93.4	93.8
> > > > > >	Q1: Comp-APC-A- , Comp-PE-A+	30.1	10008		Q1: Comp-APC-A- , Comp-PE-A+	F4/80+	59.9	62.5	57.9	62.4	30.1	36.2	45	39.2	65.6	45.3	50.1	47.1
> > > > > >	Q2: Comp-APC-A+ , Comp-PE-A+	54.1	18014		Q2: Comp-APC-A+ , Comp-PE-A+	F4/80+ and Ly6C+	23	23.6	24.4	21.7	54.1	53.6	42	54.8	23.7	41.9	41	47.9
> > > > > >	Q3: Comp-APC-A+ , Comp-PE-A-	11	3660		Q3: Comp-APC-A+ , Comp-PE-A-	Ly6C+	11.4	8.62	13	10.8	11	6.9	8.44	4.24	4.55	9.86	6.49	3.2
> > > > > >	Q4: Comp-APC-A- , Comp-PE-A-	4.82	1603		Q4: Comp-APC-A- , Comp-PE-A-	F4/80- and Ly6C-	5.66	5.23	4.77	5.13	4.82	3.36	4.6	1.84	6.14	2.85	2.36	1.76
	8se_F(2)_020.fcs		500000
>	tumor	89.4	447096
> >	Single cell	98.1	438699
> > >	Live	45.7	200379
> > > >	CD45.2+	16.1	32238
> > > >	CD45.2+&CD3-	11.5	22986				PBS(1)	PBS(2)	PBS(3)	PBS(4)	F(1)	F(2)	F(3)	F(4)	P3(1)	P3(2)	P3(3)	P3(4)
> > > > >	CD11b+	95.6	21973			tumor	453938	447265	447397	445712	475523	447096	463723	490163	480444	460421	476165	480223
> > > > > >	Q1: Comp-APC-A- , Comp-PE-A+	36.2	7945			Single cell	446682	440842	441547	438549	436370	438699	456928	484209	473105	453469	468738	471407
> > > > > >	Q2: Comp-APC-A+ , Comp-PE-A+	53.6	11772			Live	161548	131159	147285	115265	278605	200379	302157	437196	356242	242048	346707	371126
> > > > > >	Q3: Comp-APC-A+ , Comp-PE-A-	6.9	1517			CD45.2+	13321	13895	13470	13030	65412	32238	49146	56538	25156	26440	43352	46931
> > > > > >	Q4: Comp-APC-A- , Comp-PE-A-	3.36	739			CD45.2+&CD3-	10989	10806	10525	9740	48753	22986	37219	38155	19846	19726	34350	34767
	8se_F(3)_022.fcs		500000			CD11b+	10758	10586	10296	9457	33285	21973	35101	34498	18411	18655	32083	32603
>	tumor	92.7	463723		Q1: Comp-APC-A- , Comp-PE-A+	F4/80+	6444	6620	5959	5900	10008	7945	15796	13508	12077	8460	16086	15363
> >	Single cell	98.5	456928		Q2: Comp-APC-A+ , Comp-PE-A+	F4/80+ and Ly6C+	2475	2499	2512	2052	18014	11772	14729	18893	4366	7824	13158	15624
> > >	Live	66.1	302157		Q3: Comp-APC-A+ , Comp-PE-A-	Ly6C+	1230	913	1334	1020	3660	1517	2961	1463	837	1839	2083	1043
> > > >	CD45.2+	16.3	49146		Q4: Comp-APC-A- , Comp-PE-A-	F4/80- and Ly6C-	609	554	491	485	1603	739	1615	634	1131	532	756	573
> > > >	CD45.2+&CD3-	12.3	37219
> > > > >	CD11b+	94.3	35101
> > > > > >	Q1: Comp-APC-A- , Comp-PE-A+	45	15796
> > > > > >	Q2: Comp-APC-A+ , Comp-PE-A+	42	14729
> > > > > >	Q3: Comp-APC-A+ , Comp-PE-A-	8.44	2961
> > > > > >	Q4: Comp-APC-A- , Comp-PE-A-	4.6	1615
	8se_F(4)_024.fcs		500000
>	tumor	98	490163
> >	Single cell	98.8	484209
> > >	Live	90.3	437196
> > > >	CD45.2+	12.9	56538
> > > >	CD45.2+&CD3-	8.73	38155
> > > > >	CD11b+	90.4	34498
> > > > > >	Q1: Comp-APC-A- , Comp-PE-A+	39.2	13508
> > > > > >	Q2: Comp-APC-A+ , Comp-PE-A+	54.8	18893
> > > > > >	Q3: Comp-APC-A+ , Comp-PE-A-	4.24	1463
> > > > > >	Q4: Comp-APC-A- , Comp-PE-A-	1.84	634
	8se_PBS(1)_011.fcs		500000
>	tumor	90.8	453938
> >	Single cell	98.4	446682
> > >	Live	36.2	161548
> > > >	CD45.2+	8.25	13321
> > > >	CD45.2+&CD3-	6.8	10989
> > > > >	CD11b+	97.9	10758
> > > > > >	Q1: Comp-APC-A- , Comp-PE-A+	59.9	6444
> > > > > >	Q2: Comp-APC-A+ , Comp-PE-A+	23	2475
> > > > > >	Q3: Comp-APC-A+ , Comp-PE-A-	11.4	1230
> > > > > >	Q4: Comp-APC-A- , Comp-PE-A-	5.66	609
	8se_PBS(2)_012.fcs		500000
>	tumor	89.5	447265
> >	Single cell	98.6	440842
> > >	Live	29.8	131159
> > > >	CD45.2+	10.6	13895
> > > >	CD45.2+&CD3-	8.24	10806
> > > > >	CD11b+	98	10586
> > > > > >	Q1: Comp-APC-A- , Comp-PE-A+	62.5	6620
> > > > > >	Q2: Comp-APC-A+ , Comp-PE-A+	23.6	2499
> > > > > >	Q3: Comp-APC-A+ , Comp-PE-A-	8.62	913
> > > > > >	Q4: Comp-APC-A- , Comp-PE-A-	5.23	554
	8se_PBS(3)_013.fcs		500000
>	tumor	89.5	447397
> >	Single cell	98.7	441547
> > >	Live	33.4	147285
> > > >	CD45.2+	9.15	13470
> > > >	CD45.2+&CD3-	7.15	10525
> > > > >	CD11b+	97.8	10296
> > > > > >	Q1: Comp-APC-A- , Comp-PE-A+	57.9	5959
> > > > > >	Q2: Comp-APC-A+ , Comp-PE-A+	24.4	2512
> > > > > >	Q3: Comp-APC-A+ , Comp-PE-A-	13	1334
> > > > > >	Q4: Comp-APC-A- , Comp-PE-A-	4.77	491
	8se_PBS(4)_014.fcs		499675
>	tumor	89.2	445712
> >	Single cell	98.4	438549
> > >	Live	26.3	115265
> > > >	CD45.2+	11.3	13030
> > > >	CD45.2+&CD3-	8.45	9740
> > > > >	CD11b+	97.1	9457
> > > > > >	Q1: Comp-APC-A- , Comp-PE-A+	62.4	5900
> > > > > >	Q2: Comp-APC-A+ , Comp-PE-A+	21.7	2052
> > > > > >	Q3: Comp-APC-A+ , Comp-PE-A-	10.8	1020
> > > > > >	Q4: Comp-APC-A- , Comp-PE-A-	5.13	485
	8se_P3(1)_015.fcs		500000
>	tumor	96.1	480444
> >	Single cell	98.5	473105
> > >	Live	75.3	356242
> > > >	CD45.2+	7.06	25156
> > > >	CD45.2+&CD3-	5.57	19846
> > > > >	CD11b+	92.8	18411
> > > > > >	Q1: Comp-APC-A- , Comp-PE-A+	65.6	12077
> > > > > >	Q2: Comp-APC-A+ , Comp-PE-A+	23.7	4366
> > > > > >	Q3: Comp-APC-A+ , Comp-PE-A-	4.55	837
> > > > > >	Q4: Comp-APC-A- , Comp-PE-A-	6.14	1131
	8se_P3(2)_016.fcs		500000
>	tumor	92.1	460421
> >	Single cell	98.5	453469
> > >	Live	53.4	242048
> > > >	CD45.2+	10.9	26440
> > > >	CD45.2+&CD3-	8.15	19726
> > > > >	CD11b+	94.6	18655
> > > > > >	Q1: Comp-APC-A- , Comp-PE-A+	45.3	8460
> > > > > >	Q2: Comp-APC-A+ , Comp-PE-A+	41.9	7824
> > > > > >	Q3: Comp-APC-A+ , Comp-PE-A-	9.86	1839
> > > > > >	Q4: Comp-APC-A- , Comp-PE-A-	2.85	532
	8se_P3(3)_017.fcs		500000
>	tumor	95.2	476165
> >	Single cell	98.4	468738
> > >	Live	74	346707
> > > >	CD45.2+	12.5	43352
> > > >	CD45.2+&CD3-	9.91	34350
> > > > >	CD11b+	93.4	32083
> > > > > >	Q1: Comp-APC-A- , Comp-PE-A+	50.1	16086
> > > > > >	Q2: Comp-APC-A+ , Comp-PE-A+	41	13158
> > > > > >	Q3: Comp-APC-A+ , Comp-PE-A-	6.49	2083
> > > > > >	Q4: Comp-APC-A- , Comp-PE-A-	2.36	756
	8se_P3(4)_018.fcs		500000
>	tumor	96	480223
> >	Single cell	98.2	471407
> > >	Live	78.7	371126
> > > >	CD45.2+	12.6	46931
> > > >	CD45.2+&CD3-	9.37	34767
> > > > >	CD11b+	93.8	32603
> > > > > >	Q1: Comp-APC-A- , Comp-PE-A+	47.1	15363
> > > > > >	Q2: Comp-APC-A+ , Comp-PE-A+	47.9	15624
> > > > > >	Q3: Comp-APC-A+ , Comp-PE-A-	3.2	1043
> > > > > >	Q4: Comp-APC-A- , Comp-PE-A-	1.76	573
	8se_5x10e6_010.fcs		2000000
>	tumor	92.8	1856032
> >	Single cell	98.4	1826712
> > >	Live	59.9	1093851
> > > >	CD45.2+	15.8	172967
> > > >	CD45.2+&CD3-	11.8	129285
> > > > >	CD11b+	94.7	122427
> > > > > >	Q1: Comp-APC-A- , Comp-PE-A+	47.4	57975
> > > > > >	Q2: Comp-APC-A+ , Comp-PE-A+	43.4	53123
> > > > > >	Q3: Comp-APC-A+ , Comp-PE-A-	5.79	7093
> > > > > >	Q4: Comp-APC-A- , Comp-PE-A-	3.46	4236

## Sheet: Figure 1C
	Name	Statistic	#Cells			F=Caerin	P3=Control
	8se_F(1)_019.fcs		500000
>	tumor	91.8	458768
> >	Single cell	95.3	437265				PBS(1)	PBS(2)	PBS(3)	PBS(4)	F(1)	F(2)	F(3)	F(4)	F(5)	P3(1)	P3(2)	P3(3)	P3(4)
> > >	Live	71.9	314287			tumor	86	88.1	82.4	81.5	91.8	96.3	96.9	95	94	94.6	95.9	95.8	96.7
> > > >	CD45.2+	10.7	33673			Single cell	94.6	95.3	94.4	94.1	95.3	95.6	95.7	94.5	94.6	94.7	94.4	95.3	95.1
> > > >	CD45.2+&CD3-	8.15	25613			Live	28.5	47.7	30.5	30.4	71.9	88	91.8	87.3	82.7	79.9	83.7	85.5	86.8
> > > > >	CD11b+	97.2	24908			CD45.2+	11.5	6.89	10.5	10.2	10.7	13.7	14.5	20	18.9	13.8	13.5	16.6	15.7
> > > > > >	Q1: Comp-APC-A- , Comp-PE-A+	35	8729			CD45.2+&CD3-	9.14	5.39	8.73	8.58	8.15	11.4	11.2	15.2	14.8	11.1	10.6	13.3	11.8
> > > > > >	Q2: Comp-APC-A+ , Comp-PE-A+	56.7	14119			CD11b+	98.5	98.6	98.6	98.4	97.2	92.9	93.2	94.3	96.4	93.3	91.5	92.8	90.4
> > > > > >	Q3: Comp-APC-A+ , Comp-PE-A-	5.37	1338		Q1: Comp-APC-A- , Comp-PE-A+	F4/80+	46	58.3	52.3	51.9	35	51.3	30.3	31.1	26.6	48.7	44	37.2	35.5
> > > > > >	Q4: Comp-APC-A- , Comp-PE-A-	2.9	722		Q2: Comp-APC-A+ , Comp-PE-A+	F4/80+ and Ly6C+	37.6	29	31.1	31.4	56.7	42.6	59.8	56.8	64.8	45.2	49.7	56.8	58.5
	8se_F(2)_020.fcs		500000		Q3: Comp-APC-A+ , Comp-PE-A-	Ly6C+	12.2	7.01	12.2	11.3	5.37	4.4	8.37	9.72	5.98	4.71	4.9	4.91	4.77
>	tumor	96.3	481707		Q4: Comp-APC-A- , Comp-PE-A-	F4/80- and Ly6C-	4.25	5.63	4.37	5.42	2.9	1.62	1.5	2.42	2.65	1.37	1.4	1.09	1.22
> >	Single cell	95.6	460550
> > >	Live	88	405276				PBS(1)	PBS(2)	PBS(3)	PBS(4)	F(1)	F(2)	F(3)	F(4)	F(5)	P3(1)	P3(2)	P3(3)	P3(4)
> > > >	CD45.2+	13.7	55392			tumor	430130	440314	412243	407643	458768	481707	484651	474912	469944	473106	479410	479204	483470
> > > >	CD45.2+&CD3-	11.4	46038			Single cell	406919	419617	389303	383648	437265	460550	463984	448684	444692	448134	452465	456449	459702
> > > > >	CD11b+	92.9	42784			Live	116009	200334	118854	116507	314287	405276	425829	391764	367598	357997	378504	390101	398927
> > > > > >	Q1: Comp-APC-A- , Comp-PE-A+	51.3	21962			CD45.2+	13395	13794	12427	11931	33673	55392	61844	78346	69658	49579	50914	64707	62663
> > > > > >	Q2: Comp-APC-A+ , Comp-PE-A+	42.6	18246			CD45.2+&CD3-	10605	10801	10377	9994	25613	46038	47818	59369	54551	39831	40013	51771	47071
> > > > > >	Q3: Comp-APC-A+ , Comp-PE-A-	4.4	1881			CD11b+	10448	10649	10230	9832	24908	42784	44584	55981	52564	37175	36629	48023	42545
> > > > > >	Q4: Comp-APC-A- , Comp-PE-A-	1.62	695		Q1: Comp-APC-A- , Comp-PE-A+	F4/80+	4804	6212	5353	5104	8729	21962	13503	17400	13988	18100	16111	17861	15120
	8se_F(3)_021.fcs		500000		Q2: Comp-APC-A+ , Comp-PE-A+	F4/80+ and Ly6C+	3927	3091	3180	3087	14119	18246	26682	31784	34040	16814	18213	27284	24875
>	tumor	96.9	484651		Q3: Comp-APC-A+ , Comp-PE-A-	Ly6C+	1273	746	1250	1108	1338	1881	3730	5443	3141	1752	1793	2356	2029
> >	Single cell	95.7	463984		Q4: Comp-APC-A- , Comp-PE-A-	F4/80- and Ly6C-	444	600	447	533	722	695	669	1354	1395	509	512	522	521
> > >	Live	91.8	425829
> > > >	CD45.2+	14.5	61844
> > > >	CD45.2+&CD3-	11.2	47818				PBS								F								P3
> > > > >	CD11b+	93.2	44584			F4/80+	59.9	62.5	57.9	62.4	46	58.3	52.3	51.9	30.1	36.2	45	39.2	35	30.3	31.1	26.6	65.6	45.3	50.1	47.1	48.7	44	37.2	35.5
> > > > > >	Q1: Comp-APC-A- , Comp-PE-A+	30.3	13503			F4/80+ and Ly6C+	23	23.6	24.4	21.7	37.6	29	31.1	31.4	54.1	53.6	42	54.8	56.7	59.8	56.8	64.8	23.7	41.9	41	47.9	45.2	49.7	56.8	58.5
> > > > > >	Q2: Comp-APC-A+ , Comp-PE-A+	59.8	26682			F4/80+ &Ly6C+/F4/80+	0.383973	0.3776	0.421416	0.347756	0.817391	0.497427	0.594646	0.60501	1.79734	1.48066	0.933333	1.39796	1.62	1.9736	1.82637	2.43609	0.36128	0.924945	0.818363	1.01699	0.928131	1.12955	1.52688	1.64789
> > > > > >	Q3: Comp-APC-A+ , Comp-PE-A-	8.37	3730
> > > > > >	Q4: Comp-APC-A- , Comp-PE-A-	1.5	669
	8se_F(4)_022.fcs		500000
>	tumor	95	474912
> >	Single cell	94.5	448684
> > >	Live	87.3	391764
> > > >	CD45.2+	20	78346
> > > >	CD45.2+&CD3-	15.2	59369
> > > > >	CD11b+	94.3	55981
> > > > > >	Q1: Comp-APC-A- , Comp-PE-A+	31.1	17400
> > > > > >	Q2: Comp-APC-A+ , Comp-PE-A+	56.8	31784
> > > > > >	Q3: Comp-APC-A+ , Comp-PE-A-	9.72	5443
> > > > > >	Q4: Comp-APC-A- , Comp-PE-A-	2.42	1354
	8se_F(5)_023.fcs		500000
>	tumor	94	469944
> >	Single cell	94.6	444692
> > >	Live	82.7	367598
> > > >	CD45.2+	18.9	69658
> > > >	CD45.2+&CD3-	14.8	54551
> > > > >	CD11b+	96.4	52564
> > > > > >	Q1: Comp-APC-A- , Comp-PE-A+	26.6	13988
> > > > > >	Q2: Comp-APC-A+ , Comp-PE-A+	64.8	34040
> > > > > >	Q3: Comp-APC-A+ , Comp-PE-A-	5.98	3141
> > > > > >	Q4: Comp-APC-A- , Comp-PE-A-	2.65	1395
	8se_F(5)2X10^5_024.fcs		200000
	8se_PBS(1)_011.fcs		500000
>	tumor	86	430130
> >	Single cell	94.6	406919
> > >	Live	28.5	116009
> > > >	CD45.2+	11.5	13395
> > > >	CD45.2+&CD3-	9.14	10605
> > > > >	CD11b+	98.5	10448
> > > > > >	Q1: Comp-APC-A- , Comp-PE-A+	46	4804
> > > > > >	Q2: Comp-APC-A+ , Comp-PE-A+	37.6	3927
> > > > > >	Q3: Comp-APC-A+ , Comp-PE-A-	12.2	1273
> > > > > >	Q4: Comp-APC-A- , Comp-PE-A-	4.25	444
	8se_PBS(2)_012.fcs		500000
>	tumor	88.1	440314
> >	Single cell	95.3	419617
> > >	Live	47.7	200334
> > > >	CD45.2+	6.89	13794
> > > >	CD45.2+&CD3-	5.39	10801
> > > > >	CD11b+	98.6	10649
> > > > > >	Q1: Comp-APC-A- , Comp-PE-A+	58.3	6212
> > > > > >	Q2: Comp-APC-A+ , Comp-PE-A+	29	3091
> > > > > >	Q3: Comp-APC-A+ , Comp-PE-A-	7.01	746
> > > > > >	Q4: Comp-APC-A- , Comp-PE-A-	5.63	600
	8se_PBS(3)_013.fcs		500000
>	tumor	82.4	412243
> >	Single cell	94.4	389303
> > >	Live	30.5	118854
> > > >	CD45.2+	10.5	12427
> > > >	CD45.2+&CD3-	8.73	10377
> > > > >	CD11b+	98.6	10230
> > > > > >	Q1: Comp-APC-A- , Comp-PE-A+	52.3	5353
> > > > > >	Q2: Comp-APC-A+ , Comp-PE-A+	31.1	3180
> > > > > >	Q3: Comp-APC-A+ , Comp-PE-A-	12.2	1250
> > > > > >	Q4: Comp-APC-A- , Comp-PE-A-	4.37	447
	8se_PBS(4)_014.fcs		500000
>	tumor	81.5	407643
> >	Single cell	94.1	383648
> > >	Live	30.4	116507
> > > >	CD45.2+	10.2	11931
> > > >	CD45.2+&CD3-	8.58	9994
> > > > >	CD11b+	98.4	9832
> > > > > >	Q1: Comp-APC-A- , Comp-PE-A+	51.9	5104
> > > > > >	Q2: Comp-APC-A+ , Comp-PE-A+	31.4	3087
> > > > > >	Q3: Comp-APC-A+ , Comp-PE-A-	11.3	1108
> > > > > >	Q4: Comp-APC-A- , Comp-PE-A-	5.42	533
	8se_P3(1)_015.fcs		500000
>	tumor	94.6	473106
> >	Single cell	94.7	448134
> > >	Live	79.9	357997
> > > >	CD45.2+	13.8	49579
> > > >	CD45.2+&CD3-	11.1	39831
> > > > >	CD11b+	93.3	37175
> > > > > >	Q1: Comp-APC-A- , Comp-PE-A+	48.7	18100
> > > > > >	Q2: Comp-APC-A+ , Comp-PE-A+	45.2	16814
> > > > > >	Q3: Comp-APC-A+ , Comp-PE-A-	4.71	1752
> > > > > >	Q4: Comp-APC-A- , Comp-PE-A-	1.37	509
	8se_P3(2)_016.fcs		500000
>	tumor	95.9	479410
> >	Single cell	94.4	452465
> > >	Live	83.7	378504
> > > >	CD45.2+	13.5	50914
> > > >	CD45.2+&CD3-	10.6	40013
> > > > >	CD11b+	91.5	36629
> > > > > >	Q1: Comp-APC-A- , Comp-PE-A+	44	16111
> > > > > >	Q2: Comp-APC-A+ , Comp-PE-A+	49.7	18213
> > > > > >	Q3: Comp-APC-A+ , Comp-PE-A-	4.9	1793
> > > > > >	Q4: Comp-APC-A- , Comp-PE-A-	1.4	512
	8se_P3(3)_017.fcs		500000
>	tumor	95.8	479204
> >	Single cell	95.3	456449
> > >	Live	85.5	390101
> > > >	CD45.2+	16.6	64707
> > > >	CD45.2+&CD3-	13.3	51771
> > > > >	CD11b+	92.8	48023
> > > > > >	Q1: Comp-APC-A- , Comp-PE-A+	37.2	17861
> > > > > >	Q2: Comp-APC-A+ , Comp-PE-A+	56.8	27284
> > > > > >	Q3: Comp-APC-A+ , Comp-PE-A-	4.91	2356
> > > > > >	Q4: Comp-APC-A- , Comp-PE-A-	1.09	522
	8se_P3(4)_018.fcs		500000
>	tumor	96.7	483470
> >	Single cell	95.1	459702
> > >	Live	86.8	398927
> > > >	CD45.2+	15.7	62663
> > > >	CD45.2+&CD3-	11.8	47071
> > > > >	CD11b+	90.4	42545
> > > > > >	Q1: Comp-APC-A- , Comp-PE-A+	35.5	15120
> > > > > >	Q2: Comp-APC-A+ , Comp-PE-A+	58.5	24875
> > > > > >	Q3: Comp-APC-A+ , Comp-PE-A-	4.77	2029
> > > > > >	Q4: Comp-APC-A- , Comp-PE-A-	1.22	521
	8se_5x10^6_010.fcs		1000000
>	tumor	94.5	945030
> >	Single cell	95	897352
> > >	Live	80.5	722470
> > > >	CD45.2+	19.4	140367
> > > >	CD45.2+&CD3-	14.7	106520
> > > > >	CD11b+	96.5	102765
> > > > > >	Q1: Comp-APC-A- , Comp-PE-A+	28.3	29114
> > > > > >	Q2: Comp-APC-A+ , Comp-PE-A+	65.4	67163
> > > > > >	Q3: Comp-APC-A+ , Comp-PE-A-	3.98	4095
> > > > > >	Q4: Comp-APC-A- , Comp-PE-A-	2.33	2393

## Sheet: Figure 2 B M&CD45.2&CD3_1
深度	Name	Statistic	#Cells				F=Caerin	C=Clodronate		P3=Control
	8se_BV421 control_032.fcs		200000
	8se_F(1)_023.fcs		200000				PBS(1)	PBS(2)	PBS(3)	PBS(4)	PBS+C(1)	PBS+C(2)	PBS+C(3)	PBS+C(4)	P3(1)	P3(2)	P3(3)	P3(4)	F(1)	F(2)	F(3)	F(4)	F+C(1)	F+C(2)	F+C(3)	F+C(4)
>	tumor	91.8	183588			tumor	86.5	88	87.4	87.7	91.2	89	91.7	87.8	88.7	84.7	86.7	96.1	91.8	96.3	97.2	96.6	95.8	97.8	97.7	97.5
> >	Single cell	94.1	172802			Single cell	93.2	92	93.3	93.2	93.3	94.1	95.1	94.6	94.7	93.7	94.3	95.1	94.1	92.9	92.4	92.5	86.2	93.4	94.5	94.1
> > >	Live	73.6	127162			Live	25.6	38.2	24.7	24.9	53.2	48.1	57	33.2	57.2	59.7	33.8	80.5	73.6	84.4	88.2	84.6	80.5	91.4	80	89.2
> > > >	CD45.2+	48.1	61124			CD45.2+	11.5	5.25	13	13.7	7.8	7.23	9.28	8.3	22.2	18.2	17.1	14.3	48.1	38.2	39.3	29.3	27.2	25.6	13.9	21.2
> > > >	CD45.2+&CD3-	44.5	56593			CD45.2+&CD3-	10.9	4.95	12.3	13	7.33	6.86	8.7	7.66	20.1	16.7	15.9	13.7	44.5	35.3	36.4	25.7	23.1	23.6	12.9	19.7
> > > > >	CD11b+	79.7	45081			CD11b+	96.5	96.3	96.2	95.4	95.9	95.9	95.9	96.7	88.7	96.7	93.2	92.2	79.7	81.4	85.7	81.3	69.7	86	82.5	89.8
> > > > > >	Q1: Comp-APC-A- , Comp-PE-A+	53.8	24261		Q1: Comp-APC-A- , Comp-PE-A+	F4/80+	59.8	59.9	59.4	64.5	42.3	64.8	53.6	53	38.3	30	52.4	63.1	53.8	41.5	49.8	38.5	49.6	53.2	58	51.1
> > > > > > >	CD86+	55.4	13438		CD86+		94.1	96.7	91.2	95	93.3	98	96.6	97.4	85	73.7	88.2	95.6	55.4	71.7	70.8	95.6	89.8	87.9	91.1	80.8
> > > > > > >	MHCⅡ+	91.7	22239		MHCⅡ+		36.6	44.6	51.4	58	50.7	68.9	60.1	67.3	79	66.1	63.5	87.7	91.7	92.9	85.7	78.7	95	95.4	92.7	91.7
> > > > > >	Q2: Comp-APC-A+ , Comp-PE-A+	40.2	18124		Q2: Comp-APC-A+ , Comp-PE-A+	F4/80+ and Ly6C+	26.7	19.3	24.7	23.9	40.5	24.5	35.4	31.4	51.5	32.4	34.6	28.7	40.2	47.3	42.6	53.2	40.2	41.6	35.3	43.6
> > > > > > >	CD86+	67.5	12234		CD86+		64.6	69	57.9	72.5	58.5	66.1	62.5	66.1	61.1	51.5	57.9	67.4	67.5	65.8	70.1	52	74	70.5	70.3	72.6
> > > > > > >	MHCⅡ+	64.9	11756		MHCⅡ+		20.6	19.7	28.1	36.9	20.6	29.1	26.9	28.3	42.7	34.7	36	44.7	64.9	68.7	61.7	55.1	71	67.6	51.7	67.6
> > > > > >	Q3: Comp-APC-A+ , Comp-PE-A-	3.85	1736		Q3: Comp-APC-A+ , Comp-PE-A-	Ly6C+	8.69	14.4	9.1	6.17	14	6.94	8.07	9.73	7.57	21.3	8.42	5.98	3.85	6.58	4.48	4.07	7.23	3.68	4.81	3.84
> > > > > > >	CD86+	24.3	422		CD86+		14	13.2	13.9	24.1	10.8	14.7	14.6	17.6	27.6	33.6	22.6	18	24.3	34.9	45.3	15	20.7	32.2	26.1	27.6
> > > > > > >	MHCⅡ+	27.5	478		MHCⅡ+		9.76	8.24	13.6	20.9	5.7	8.97	8.37	10.1	21.5	21.7	19	11.1	27.5	40.1	44.4	16	25.3	34.2	24.9	34.7
> > > > > >	Q4: Comp-APC-A- , Comp-PE-A-	2.13	960		Q4: Comp-APC-A- , Comp-PE-A-	F4/80- and Ly6C-	4.84	6.38	6.85	5.48	3.11	3.74	2.93	5.83	2.55	16.2	4.67	2.3	2.13	4.54	3.09	4.28	2.96	1.53	1.84	1.42
> > > > > > >	CD86+	20.1	193		CD86+		55	53.7	55.2	61.2	53	63.6	52.3	61.3	51.5	65.1	48.3	58.5	20.1	21.3	34.6	27.4	41.5	43.9	59.9	43.3
> > > > > > >	MHCⅡ+	28.6	275		MHCⅡ+		58.8	59	76.4	69.9	52.5	70.2	56.8	51.7	51	42.1	59.8	63.6	28.6	28.4	43.6	10.2	65.8	54.7	73.4	62.5
> > > > >	macrophages	52.3	29581		macrophages	macrophages	60.7	55.9	55.1	61.1	47.9	64	58.4	50.9	42.4	17	49	64	52.3	39.6	49	47.5	43.5	55.8	55	57.2
> > > >	CD45.2+&F4\80+	22.4	28512		CD45.2+&F4\80+	CD45.2+&F4\80+	6.31	2.65	6.32	7.48	3.36	4.24	4.87	3.71	8	2.23	7.25	8.45	22.4	13.2	16.9	11.9	9.63	12.7	6.76	10.7
	8se_F(2)_024.fcs		200000
>	tumor	96.3	192681				PBS(1)	PBS(2)	PBS(3)	PBS(4)	PBS+C(1)	PBS+C(2)	PBS+C(3)	PBS+C(4)	P3(1)	P3(2)	P3(3)	P3(4)	F(1)	F(2)	F(3)	F(4)	F+C(1)	F+C(2)	F+C(3)	F+C(4)
> >	Single cell	92.9	179052			F4/80+	59.8	59.9	59.4	64.5	42.3	64.8	53.6	53	38.3	30	52.4	63.1	53.8	41.5	49.8	38.5	49.6	53.2	58	51.1
> > >	Live	84.4	151051			F4/80+ and Ly6C+	26.7	19.3	24.7	23.9	40.5	24.5	35.4	31.4	51.5	32.4	34.6	28.7	40.2	47.3	42.6	53.2	40.2	41.6	35.3	43.6
> > > >	CD45.2+	38.2	57630			Ly6C+	8.69	14.4	9.1	6.17	14	6.94	8.07	9.73	7.57	21.3	8.42	5.98	3.85	6.58	4.48	4.07	7.23	3.68	4.81	3.84
> > > >	CD45.2+&CD3-	35.3	53309			F4/80- and Ly6C-	4.84	6.38	6.85	5.48	3.11	3.74	2.93	5.83	2.55	16.2	4.67	2.3	2.13	4.54	3.09	4.28	2.96	1.53	1.84	1.42
> > > > >	CD11b+	81.4	43416
> > > > > >	Q1: Comp-APC-A- , Comp-PE-A+	41.5	18036
> > > > > > >	CD86+	71.7	12935
> > > > > > >	MHCⅡ+	92.9	16750		CD86+		PBS(1)	PBS(2)	PBS(3)	PBS(4)	PBS+C(1)	PBS+C(2)	PBS+C(3)	PBS+C(4)	P3(1)	P3(2)	P3(3)	P3(4)	F(1)	F(2)	F(3)	F(4)	F+C(1)	F+C(2)	F+C(3)	F+C(4)
> > > > > >	Q2: Comp-APC-A+ , Comp-PE-A+	47.3	20552			F4/80+	94.1	96.7	91.2	95	93.3	98	96.6	97.4	85	73.7	88.2	95.6	55.4	71.7	70.8	95.6	89.8	87.9	91.1	80.8
> > > > > > >	CD86+	65.8	13522			F4/80+ and Ly6C+	64.6	69	57.9	72.5	58.5	66.1	62.5	66.1	61.1	51.5	57.9	67.4	67.5	65.8	70.1	52	74	70.5	70.3	72.6
> > > > > > >	MHCⅡ+	68.7	14122			Ly6C+	14	13.2	13.9	24.1	10.8	14.7	14.6	17.6	27.6	33.6	22.6	18	24.3	34.9	45.3	15	20.7	32.2	26.1	27.6
> > > > > >	Q3: Comp-APC-A+ , Comp-PE-A-	6.58	2857			F4/80- and Ly6C-	55	53.7	55.2	61.2	53	63.6	52.3	61.3	51.5	65.1	48.3	58.5	20.1	21.3	34.6	27.4	41.5	43.9	59.9	43.3
> > > > > > >	CD86+	34.9	997
> > > > > > >	MHCⅡ+	40.1	1145
> > > > > >	Q4: Comp-APC-A- , Comp-PE-A-	4.54	1971
> > > > > > >	CD86+	21.3	420		MHCⅡ+		PBS(1)	PBS(2)	PBS(3)	PBS(4)	PBS+C(1)	PBS+C(2)	PBS+C(3)	PBS+C(4)	P3(1)	P3(2)	P3(3)	P3(4)	F(1)	F(2)	F(3)	F(4)	F+C(1)	F+C(2)	F+C(3)	F+C(4)
> > > > > > >	MHCⅡ+	28.4	559			F4/80+	36.6	44.6	51.4	58	50.7	68.9	60.1	67.3	79	66.1	63.5	87.7	91.7	92.9	85.7	78.7	95	95.4	92.7	91.7
> > > > >	macrophages	39.6	21115			F4/80+ and Ly6C+	20.6	19.7	28.1	36.9	20.6	29.1	26.9	28.3	42.7	34.7	36	44.7	64.9	68.7	61.7	55.1	71	67.6	51.7	67.6
> > > >	CD45.2+&F4\80+	13.2	19980			Ly6C+	9.76	8.24	13.6	20.9	5.7	8.97	8.37	10.1	21.5	21.7	19	11.1	27.5	40.1	44.4	16	25.3	34.2	24.9	34.7
	8se_F(3)_025.fcs		200000			F4/80- and Ly6C-	58.8	59	76.4	69.9	52.5	70.2	56.8	51.7	51	42.1	59.8	63.6	28.6	28.4	43.6	10.2	65.8	54.7	73.4	62.5
>	tumor	97.2	194473
> >	Single cell	92.4	179766				PBS(1)	PBS(2)	PBS(3)	PBS(4)	PBS+C(1)	PBS+C(2)	PBS+C(3)	PBS+C(4)	P3(1)	P3(2)	P3(3)	P3(4)	F(1)	F(2)	F(3)	F(4)	F+C(1)	F+C(2)	F+C(3)	F+C(4)
> > >	Live	88.2	158629			CD45.2	11.5	5.25	13	13.7	7.8	7.23	9.28	8.3	22.2	18.2	17.1	14.3	48.1	38.2	39.3	29.3	27.2	25.6	13.9	21.2
> > > >	CD45.2+	39.3	62296		live以下	macrophages	6.45	2.71	6.51	7.67	3.42	4.31	4.95	3.8	8.24	2.44	7.47	8.57	22.8	13.5	17.3	12.3	9.75	12.9	6.83	10.9	手动输入
> > > >	CD45.2+&CD3-	36.4	57701			CD45.2+&F4\80+	6.31	2.65	6.32	7.48	3.36	4.24	4.87	3.71	8	2.23	7.25	8.45	22.4	13.2	16.9	3.19	9.63	12.7	6.76	10.7
> > > > >	CD11b+	85.7	49423
> > > > > >	Q1: Comp-APC-A- , Comp-PE-A+	49.8	24622
> > > > > > >	CD86+	70.8	17440
> > > > > > >	MHCⅡ+	85.7	21103
> > > > > >	Q2: Comp-APC-A+ , Comp-PE-A+	42.6	21061
> > > > > > >	CD86+	70.1	14770
> > > > > > >	MHCⅡ+	61.7	13005
> > > > > >	Q3: Comp-APC-A+ , Comp-PE-A-	4.48	2212
> > > > > > >	CD86+	45.3	1003
> > > > > > >	MHCⅡ+	44.4	982
> > > > > >	Q4: Comp-APC-A- , Comp-PE-A-	3.09	1528
> > > > > > >	CD86+	34.6	528
> > > > > > >	MHCⅡ+	43.6	666
> > > > >	macrophages	49	28248
> > > >	CD45.2+&F4\80+	16.9	26765
	8se_F(4)_026.fcs		200000
>	tumor	96.6	193179
> >	Single cell	92.5	178625
> > >	Live	84.6	151034
> > > >	CD45.2+	29.3	44272
> > > >	CD45.2+&CD3-	25.7	38771
> > > > >	CD11b+	81.3	31509
> > > > > >	Q1: Comp-APC-A- , Comp-PE-A+	38.5	12129
> > > > > > >	CD86+	95.6	11590
> > > > > > >	MHCⅡ+	78.7	9541
> > > > > >	Q2: Comp-APC-A+ , Comp-PE-A+	53.2	16748
> > > > > > >	CD86+	52	8717
> > > > > > >	MHCⅡ+	55.1	9229
> > > > > >	Q3: Comp-APC-A+ , Comp-PE-A-	4.07	1283
> > > > > > >	CD86+	15	193
> > > > > > >	MHCⅡ+	16	205
> > > > > >	Q4: Comp-APC-A- , Comp-PE-A-	4.28	1349
> > > > > > >	CD86+	27.4	370
> > > > > > >	MHCⅡ+	10.2	137
> > > > >	macrophages	47.5	18424
> > > >	CD45.2+&F4\80+	11.9	18033
	8se_F+C(1)_027.fcs		200000
>	tumor	95.8	191633
> >	Single cell	86.2	165173
> > >	Live	80.5	132934
> > > >	CD45.2+	27.2	36196
> > > >	CD45.2+&CD3-	23.1	30730
> > > > >	CD11b+	69.7	21410
> > > > > >	Q1: Comp-APC-A- , Comp-PE-A+	49.6	10615
> > > > > > >	CD86+	89.8	9532
> > > > > > >	MHCⅡ+	95	10080
> > > > > >	Q2: Comp-APC-A+ , Comp-PE-A+	40.2	8614
> > > > > > >	CD86+	74	6378
> > > > > > >	MHCⅡ+	71	6120
> > > > > >	Q3: Comp-APC-A+ , Comp-PE-A-	7.23	1547
> > > > > > >	CD86+	20.7	321
> > > > > > >	MHCⅡ+	25.3	392
> > > > > >	Q4: Comp-APC-A- , Comp-PE-A-	2.96	634
> > > > > > >	CD86+	41.5	263
> > > > > > >	MHCⅡ+	65.8	417
> > > > >	macrophages	43.5	13377
> > > >	CD45.2+&F4\80+	9.63	12807
	8se_F+C(2)_028.fcs		200000
>	tumor	97.8	195689
> >	Single cell	93.4	182836
> > >	Live	91.4	167049
> > > >	CD45.2+	25.6	42741
> > > >	CD45.2+&CD3-	23.6	39411
> > > > >	CD11b+	86	33911
> > > > > >	Q1: Comp-APC-A- , Comp-PE-A+	53.2	18033
> > > > > > >	CD86+	87.9	15856
> > > > > > >	MHCⅡ+	95.4	17205
> > > > > >	Q2: Comp-APC-A+ , Comp-PE-A+	41.6	14112
> > > > > > >	CD86+	70.5	9947
> > > > > > >	MHCⅡ+	67.6	9535
> > > > > >	Q3: Comp-APC-A+ , Comp-PE-A-	3.68	1247
> > > > > > >	CD86+	32.2	402
> > > > > > >	MHCⅡ+	34.2	426
> > > > > >	Q4: Comp-APC-A- , Comp-PE-A-	1.53	519
> > > > > > >	CD86+	43.9	228
> > > > > > >	MHCⅡ+	54.7	284
> > > > >	macrophages	55.8	21999
> > > >	CD45.2+&F4\80+	12.7	21284
	8se_F+C(3)_029.fcs		200000
>	tumor	97.7	195401
> >	Single cell	94.5	184739
> > >	Live	80	147719
> > > >	CD45.2+	13.9	20464
> > > >	CD45.2+&CD3-	12.9	19011
> > > > >	CD11b+	82.5	15691
> > > > > >	Q1: Comp-APC-A- , Comp-PE-A+	58	9107
> > > > > > >	CD86+	91.1	8301
> > > > > > >	MHCⅡ+	92.7	8439
> > > > > >	Q2: Comp-APC-A+ , Comp-PE-A+	35.3	5540
> > > > > > >	CD86+	70.3	3892
> > > > > > >	MHCⅡ+	51.7	2865
> > > > > >	Q3: Comp-APC-A+ , Comp-PE-A-	4.81	755
> > > > > > >	CD86+	26.1	197
> > > > > > >	MHCⅡ+	24.9	188
> > > > > >	Q4: Comp-APC-A- , Comp-PE-A-	1.84	289
> > > > > > >	CD86+	59.9	173
> > > > > > >	MHCⅡ+	73.4	212
> > > > >	macrophages	55	10451
> > > >	CD45.2+&F4\80+	6.76	9989
	8se_F+C(4)_030.fcs		200000
>	tumor	97.5	195049
> >	Single cell	94.1	183636
> > >	Live	89.2	163745
> > > >	CD45.2+	21.2	34725
> > > >	CD45.2+&CD3-	19.7	32326
> > > > >	CD11b+	89.8	29039
> > > > > >	Q1: Comp-APC-A- , Comp-PE-A+	51.1	14841
> > > > > > >	CD86+	80.8	11991
> > > > > > >	MHCⅡ+	91.7	13603
> > > > > >	Q2: Comp-APC-A+ , Comp-PE-A+	43.6	12670
> > > > > > >	CD86+	72.6	9197
> > > > > > >	MHCⅡ+	67.6	8564
> > > > > >	Q3: Comp-APC-A+ , Comp-PE-A-	3.84	1115
> > > > > > >	CD86+	27.6	308
> > > > > > >	MHCⅡ+	34.7	387
> > > > > >	Q4: Comp-APC-A- , Comp-PE-A-	1.42	413
> > > > > > >	CD86+	43.3	179
> > > > > > >	MHCⅡ+	62.5	258
> > > > >	macrophages	57.2	18475
> > > >	CD45.2+&F4\80+	10.7	17579
	8se_PBS(1)_011.fcs		200000
>	tumor	86.5	173080
> >	Single cell	93.2	161246
> > >	Live	25.6	41321
> > > >	CD45.2+	11.5	4737
> > > >	CD45.2+&CD3-	10.9	4522
> > > > >	CD11b+	96.5	4363
> > > > > >	Q1: Comp-APC-A- , Comp-PE-A+	59.8	2607
> > > > > > >	CD86+	94.1	2454
> > > > > > >	MHCⅡ+	36.6	955
> > > > > >	Q2: Comp-APC-A+ , Comp-PE-A+	26.7	1166
> > > > > > >	CD86+	64.6	753
> > > > > > >	MHCⅡ+	20.6	240
> > > > > >	Q3: Comp-APC-A+ , Comp-PE-A-	8.69	379
> > > > > > >	CD86+	14	53
> > > > > > >	MHCⅡ+	9.76	37
> > > > > >	Q4: Comp-APC-A- , Comp-PE-A-	4.84	211
> > > > > > >	CD86+	55	116
> > > > > > >	MHCⅡ+	58.8	124
> > > > >	macrophages	60.7	2743
> > > >	CD45.2+&F4\80+	6.31	2608
	8se_PBS(2)_012.fcs		200000
>	tumor	88	175950
> >	Single cell	92	161838
> > >	Live	38.2	61841
> > > >	CD45.2+	5.25	3249
> > > >	CD45.2+&CD3-	4.95	3060
> > > > >	CD11b+	96.3	2947
> > > > > >	Q1: Comp-APC-A- , Comp-PE-A+	59.9	1766
> > > > > > >	CD86+	96.7	1707
> > > > > > >	MHCⅡ+	44.6	788
> > > > > >	Q2: Comp-APC-A+ , Comp-PE-A+	19.3	568
> > > > > > >	CD86+	69	392
> > > > > > >	MHCⅡ+	19.7	112
> > > > > >	Q3: Comp-APC-A+ , Comp-PE-A-	14.4	425
> > > > > > >	CD86+	13.2	56
> > > > > > >	MHCⅡ+	8.24	35
> > > > > >	Q4: Comp-APC-A- , Comp-PE-A-	6.38	188
> > > > > > >	CD86+	53.7	101
> > > > > > >	MHCⅡ+	59	111
> > > > >	macrophages	55.9	1711
> > > >	CD45.2+&F4\80+	2.65	1636
	8se_PBS(3)_013.fcs		200000
>	tumor	87.4	174711
> >	Single cell	93.3	163024
> > >	Live	24.7	40256
> > > >	CD45.2+	13	5243
> > > >	CD45.2+&CD3-	12.3	4943
> > > > >	CD11b+	96.2	4756
> > > > > >	Q1: Comp-APC-A- , Comp-PE-A+	59.4	2823
> > > > > > >	CD86+	91.2	2575
> > > > > > >	MHCⅡ+	51.4	1451
> > > > > >	Q2: Comp-APC-A+ , Comp-PE-A+	24.7	1174
> > > > > > >	CD86+	57.9	680
> > > > > > >	MHCⅡ+	28.1	330
> > > > > >	Q3: Comp-APC-A+ , Comp-PE-A-	9.1	433
> > > > > > >	CD86+	13.9	60
> > > > > > >	MHCⅡ+	13.6	59
> > > > > >	Q4: Comp-APC-A- , Comp-PE-A-	6.85	326
> > > > > > >	CD86+	55.2	180
> > > > > > >	MHCⅡ+	76.4	249
> > > > >	macrophages	55.1	2725
> > > >	CD45.2+&F4\80+	6.32	2545
	8se_PBS(4)_014.fcs		200000
>	tumor	87.7	175451
> >	Single cell	93.2	163582
> > >	Live	24.9	40663
> > > >	CD45.2+	13.7	5567
> > > >	CD45.2+&CD3-	13	5284
> > > > >	CD11b+	95.4	5040
> > > > > >	Q1: Comp-APC-A- , Comp-PE-A+	64.5	3249
> > > > > > >	CD86+	95	3086
> > > > > > >	MHCⅡ+	58	1885
> > > > > >	Q2: Comp-APC-A+ , Comp-PE-A+	23.9	1204
> > > > > > >	CD86+	72.5	873
> > > > > > >	MHCⅡ+	36.9	444
> > > > > >	Q3: Comp-APC-A+ , Comp-PE-A-	6.17	311
> > > > > > >	CD86+	24.1	75
> > > > > > >	MHCⅡ+	20.9	65
> > > > > >	Q4: Comp-APC-A- , Comp-PE-A-	5.48	276
> > > > > > >	CD86+	61.2	169
> > > > > > >	MHCⅡ+	69.9	193
> > > > >	macrophages	61.1	3229
> > > >	CD45.2+&F4\80+	7.48	3041
	8se_PBS+C(1)_015.fcs		200000
>	tumor	91.2	182376
> >	Single cell	93.3	170222
> > >	Live	53.2	90634
> > > >	CD45.2+	7.8	7065
> > > >	CD45.2+&CD3-	7.33	6643
> > > > >	CD11b+	95.9	6371
> > > > > >	Q1: Comp-APC-A- , Comp-PE-A+	42.3	2696
> > > > > > >	CD86+	93.3	2515
> > > > > > >	MHCⅡ+	50.7	1366
> > > > > >	Q2: Comp-APC-A+ , Comp-PE-A+	40.5	2582
> > > > > > >	CD86+	58.5	1511
> > > > > > >	MHCⅡ+	20.6	532
> > > > > >	Q3: Comp-APC-A+ , Comp-PE-A-	14	895
> > > > > > >	CD86+	10.8	97
> > > > > > >	MHCⅡ+	5.7	51
> > > > > >	Q4: Comp-APC-A- , Comp-PE-A-	3.11	198
> > > > > > >	CD86+	53	105
> > > > > > >	MHCⅡ+	52.5	104
> > > > >	macrophages	47.9	3181
> > > >	CD45.2+&F4\80+	3.36	3043
	8se_PBS+C(2)_016.fcs		200000
>	tumor	89	177939
> >	Single cell	94.1	167468
> > >	Live	48.1	80548
> > > >	CD45.2+	7.23	5822
> > > >	CD45.2+&CD3-	6.86	5527
> > > > >	CD11b+	95.9	5299
> > > > > >	Q1: Comp-APC-A- , Comp-PE-A+	64.8	3433
> > > > > > >	CD86+	98	3363
> > > > > > >	MHCⅡ+	68.9	2365
> > > > > >	Q2: Comp-APC-A+ , Comp-PE-A+	24.5	1300
> > > > > > >	CD86+	66.1	859
> > > > > > >	MHCⅡ+	29.1	378
> > > > > >	Q3: Comp-APC-A+ , Comp-PE-A-	6.94	368
> > > > > > >	CD86+	14.7	54
> > > > > > >	MHCⅡ+	8.97	33
> > > > > >	Q4: Comp-APC-A- , Comp-PE-A-	3.74	198
> > > > > > >	CD86+	63.6	126
> > > > > > >	MHCⅡ+	70.2	139
> > > > >	macrophages	64	3540
> > > >	CD45.2+&F4\80+	4.24	3415
	8se_PBS+C(3)_017.fcs		200000
>	tumor	91.7	183306
> >	Single cell	95.1	174235
> > >	Live	57	99283
> > > >	CD45.2+	9.28	9212
> > > >	CD45.2+&CD3-	8.7	8639
> > > > >	CD11b+	95.9	8287
> > > > > >	Q1: Comp-APC-A- , Comp-PE-A+	53.6	4439
> > > > > > >	CD86+	96.6	4290
> > > > > > >	MHCⅡ+	60.1	2670
> > > > > >	Q2: Comp-APC-A+ , Comp-PE-A+	35.4	2936
> > > > > > >	CD86+	62.5	1834
> > > > > > >	MHCⅡ+	26.9	789
> > > > > >	Q3: Comp-APC-A+ , Comp-PE-A-	8.07	669
> > > > > > >	CD86+	14.6	98
> > > > > > >	MHCⅡ+	8.37	56
> > > > > >	Q4: Comp-APC-A- , Comp-PE-A-	2.93	243
> > > > > > >	CD86+	52.3	127
> > > > > > >	MHCⅡ+	56.8	138
> > > > >	macrophages	58.4	5048
> > > >	CD45.2+&F4\80+	4.87	4837
	8se_PBS+C(4)_018.fcs		200000
>	tumor	87.8	175618
> >	Single cell	94.6	166157
> > >	Live	33.2	55095
> > > >	CD45.2+	8.3	4574
> > > >	CD45.2+&CD3-	7.66	4219
> > > > >	CD11b+	96.7	4081
> > > > > >	Q1: Comp-APC-A- , Comp-PE-A+	53	2163
> > > > > > >	CD86+	97.4	2107
> > > > > > >	MHCⅡ+	67.3	1455
> > > > > >	Q2: Comp-APC-A+ , Comp-PE-A+	31.4	1283
> > > > > > >	CD86+	66.1	848
> > > > > > >	MHCⅡ+	28.3	363
> > > > > >	Q3: Comp-APC-A+ , Comp-PE-A-	9.73	397
> > > > > > >	CD86+	17.6	70
> > > > > > >	MHCⅡ+	10.1	40
> > > > > >	Q4: Comp-APC-A- , Comp-PE-A-	5.83	238
> > > > > > >	CD86+	61.3	146
> > > > > > >	MHCⅡ+	51.7	123
> > > > >	macrophages	50.9	2149
> > > >	CD45.2+&F4\80+	3.71	2046
	8se_PE-Cy7 control_031.fcs		200000
	8se_P3(1)_019.fcs		200000
>	tumor	88.7	177351
> >	Single cell	94.7	167891
> > >	Live	57.2	96043
> > > >	CD45.2+	22.2	21357
> > > >	CD45.2+&CD3-	20.1	19303
> > > > >	CD11b+	88.7	17115
> > > > > >	Q1: Comp-APC-A- , Comp-PE-A+	38.3	6560
> > > > > > >	CD86+	85	5573
> > > > > > >	MHCⅡ+	79	5184
> > > > > >	Q2: Comp-APC-A+ , Comp-PE-A+	51.5	8822
> > > > > > >	CD86+	61.1	5394
> > > > > > >	MHCⅡ+	42.7	3769
> > > > > >	Q3: Comp-APC-A+ , Comp-PE-A-	7.57	1296
> > > > > > >	CD86+	27.6	358
> > > > > > >	MHCⅡ+	21.5	278
> > > > > >	Q4: Comp-APC-A- , Comp-PE-A-	2.55	437
> > > > > > >	CD86+	51.5	225
> > > > > > >	MHCⅡ+	51	223
> > > > >	macrophages	42.4	8192
> > > >	CD45.2+&F4\80+	8	7686
	8se_P3(2)_020.fcs		200000
>	tumor	84.7	169410
> >	Single cell	93.7	158759
> > >	Live	59.7	94775
> > > >	CD45.2+	18.2	17218
> > > >	CD45.2+&CD3-	16.7	15813
> > > > >	CD11b+	96.7	15298
> > > > > >	Q1: Comp-APC-A- , Comp-PE-A+	30	4596
> > > > > > >	CD86+	73.7	3387
> > > > > > >	MHCⅡ+	66.1	3040
> > > > > >	Q2: Comp-APC-A+ , Comp-PE-A+	32.4	4956
> > > > > > >	CD86+	51.5	2553
> > > > > > >	MHCⅡ+	34.7	1720
> > > > > >	Q3: Comp-APC-A+ , Comp-PE-A-	21.3	3261
> > > > > > >	CD86+	33.6	1096
> > > > > > >	MHCⅡ+	21.7	708
> > > > > >	Q4: Comp-APC-A- , Comp-PE-A-	16.2	2485
> > > > > > >	CD86+	65.1	1618
> > > > > > >	MHCⅡ+	42.1	1046
> > > > >	macrophages	17	2690
> > > >	CD45.2+&F4\80+	2.23	2111
	8se_P3(3)_021.fcs		200000
>	tumor	86.7	173390
> >	Single cell	94.3	163529
> > >	Live	33.8	55270
> > > >	CD45.2+	17.1	9467
> > > >	CD45.2+&CD3-	15.9	8802
> > > > >	CD11b+	93.2	8206
> > > > > >	Q1: Comp-APC-A- , Comp-PE-A+	52.4	4296
> > > > > > >	CD86+	88.2	3790
> > > > > > >	MHCⅡ+	63.5	2730
> > > > > >	Q2: Comp-APC-A+ , Comp-PE-A+	34.6	2836
> > > > > > >	CD86+	57.9	1643
> > > > > > >	MHCⅡ+	36	1020
> > > > > >	Q3: Comp-APC-A+ , Comp-PE-A-	8.42	691
> > > > > > >	CD86+	22.6	156
> > > > > > >	MHCⅡ+	19	131
> > > > > >	Q4: Comp-APC-A- , Comp-PE-A-	4.67	383
> > > > > > >	CD86+	48.3	185
> > > > > > >	MHCⅡ+	59.8	229
> > > > >	macrophages	49	4311
> > > >	CD45.2+&F4\80+	7.25	4008
	8se_P3(4)_022.fcs		200000
>	tumor	96.1	192156
> >	Single cell	95.1	182697
> > >	Live	80.5	147153
> > > >	CD45.2+	14.3	21027
> > > >	CD45.2+&CD3-	13.7	20092
> > > > >	CD11b+	92.2	18524
> > > > > >	Q1: Comp-APC-A- , Comp-PE-A+	63.1	11680
> > > > > > >	CD86+	95.6	11163
> > > > > > >	MHCⅡ+	87.7	10244
> > > > > >	Q2: Comp-APC-A+ , Comp-PE-A+	28.7	5311
> > > > > > >	CD86+	67.4	3580
> > > > > > >	MHCⅡ+	44.7	2374
> > > > > >	Q3: Comp-APC-A+ , Comp-PE-A-	5.98	1107
> > > > > > >	CD86+	18	199
> > > > > > >	MHCⅡ+	11.1	123
> > > > > >	Q4: Comp-APC-A- , Comp-PE-A-	2.3	426
> > > > > > >	CD86+	58.5	249
> > > > > > >	MHCⅡ+	63.6	271
> > > > >	macrophages	64	12860
> > > >	CD45.2+&F4\80+	8.45	12432
	8se_3x10e6_010.fcs		500000
>	tumor	96.2	480754
> >	Single cell	86.2	414243
> > >	Live	83.2	344485
> > > >	CD45.2+	29.7	102461
> > > >	CD45.2+&CD3-	22.6	77885
> > > > >	CD11b+	72.9	56745
> > > > > >	Q1: Comp-APC-A- , Comp-PE-A+	51.4	29152
> > > > > > >	CD86+	92.8	27064
> > > > > > >	MHCⅡ+	94.9	27676
> > > > > >	Q2: Comp-APC-A+ , Comp-PE-A+	44.5	25249
> > > > > > >	CD86+	75.2	18978
> > > > > > >	MHCⅡ+	68	17165
> > > > > >	Q3: Comp-APC-A+ , Comp-PE-A-	2.57	1456
> > > > > > >	CD86+	17.1	249
> > > > > > >	MHCⅡ+	24.5	357
> > > > > >	Q4: Comp-APC-A- , Comp-PE-A-	1.56	888
> > > > > > >	CD86+	39.4	350
> > > > > > >	MHCⅡ+	72.6	645
> > > > >	macrophages	54.6	42500
> > > >	CD45.2+&F4\80+	12.6	43514

## Sheet: T cells
	Name	Statistic	#Cells				F=Caerin	C=Clodronate		P3=Control
	T cell_BV421 control_055.fcs		200000
	T cell_F(1)_046.fcs		200050					PBS(1)	PBS(2)	PBS(3)	PBS(4)	PBS+C(1)	PBS+C(2)	PBS+C(3)	PBS+C(4)	P3(1)	P3(2)	P3(3)	P3(4)	F(1)	F(2)	F(3)	F+C(1)	F+C(2)	F+C(3)	F+C(4)
>	tumor	92.4	184854				tumor	87.4	89.1	87	87.6	92.1	89.8	92.1	88.3	88.5	85.2	87.9	96.5	92.4	96.6	97.6	96.7	97.7	97.2	97.3
> >	Single cell	93	171996				Single cell	92.8	92.1	93.4	93.6	93.2	93.7	95	94.6	94.5	93.6	93.6	93.1	93	93	93.5	86.8	92.8	94.3	93.8
> > >	Live	73.7	126782				Live	30.6	43.5	25.1	27.1	55.4	49.4	57.8	29.4	53.7	49.1	41	83.4	73.7	85.3	88.4	84.8	91	85.8	86.7
> > > >	CD45.2+	51.8	65695				CD45.2+	11	5.34	13.8	14.7	7.99	7.93	10.3	9.5	25.9	21.8	17.5	15.4	51.8	43.5	44.3	28.1	28.7	14	23.9
> > > > >	B220+	45.4	29857				B220+	66.9	66.3	63.1	74.3	55.6	73	65.4	65.9	46.1	38.8	58.7	76.8	45.4	35.7	42	57.7	53.6	65.3	61.6
> > > > >	CD3+	28.5	18744				CD3+	42.6	50	45.2	56.7	35.8	57.3	49.3	51.2	27.1	22.6	38.8	60.6	28.5	27.9	24.4	39.6	33.6	44.5	37.6
> > > >	CD45.2+&CD3+	19.6	24792				CD45.2+&CD3+	5.64	3.08	7.48	9.44	3.58	5.11	5.84	5.49	9.24	6.87	8.55	10.4	19.6	15.5	14.7	12.9	12	7.59	11.5
> > > > >	Q1: CD4+&CD8a-	10.9	2694				Q1: CD4+&CD8a-	9.04	10.1	9.83	10.4	8.72	8.06	7.17	7.97	12.2	15.3	13.2	6.41	10.9	11.3	9.71	19.6	8.03	9	5.22
> > > > >	Q2: CD4+&CD8a+	2.07	512				Q2: CD4+&CD8a+	0.89	0.32	0.29	0.26	0.32	0.14	0.3	0.37	0.58	0.45	0.26	0.33	2.07	1.9	1.19	2.72	1.31	0.59	0.5
> > > > >	Q3: CD4-&CD8a+	16.6	4113				Q3: CD4-&CD8a+	1.29	0.87	0.75	1.29	2.03	1.3	1.32	1.3	5.82	5.2	3.21	3.66	16.6	15.2	13.1	28	16.3	13.3	9.85
> > > > >	Q4: CD4-&CD8a-	70.5	17473				Q4: CD4-&CD8a-	88.8	88.7	89.1	88	88.9	90.5	91.2	90.4	81.4	79	83.3	89.6	70.5	71.6	76	49.7	74.3	77.1	84.4
	T cell_F(2)_047.fcs		200000
>	tumor	96.6	193248
> >	Single cell	93	179699
> > >	Live	85.3	153307					PBS(1)	PBS(2)	PBS(3)	PBS(4)	PBS+C(1)	PBS+C(2)	PBS+C(3)	PBS+C(4)	P3(1)	P3(2)	P3(3)	P3(4)	F(1)	F(2)	F(3)	F+C(1)	F+C(2)	F+C(3)	F+C(4)
> > > >	CD45.2+	43.5	66656				CD45.2+	11	5.34	13.8	14.7	7.99	7.93	10.3	9.5	25.9	21.8	17.5	15.4	51.8	43.5	44.3	28.1	28.7	14	23.9
> > > > >	B220+	35.7	23803				CD45.2+&CD3+	5.64	3.08	7.48	9.44	3.58	5.11	5.84	5.49	9.24	6.87	8.55	10.4	19.6	15.5	14.7	12.9	12	7.59	11.5
> > > > >	CD3+	27.9	18582				CD4+&CD8a-	9.04	10.1	9.83	10.4	8.72	8.06	7.17	7.97	12.2	15.3	13.2	6.41	10.9	11.3	9.71	19.6	8.03	9	5.22
> > > >	CD45.2+&CD3+	15.5	23738				CD4+&CD8a+	0.89	0.32	0.29	0.26	0.32	0.14	0.3	0.37	0.58	0.45	0.26	0.33	2.07	1.9	1.19	2.72	1.31	0.59	0.5
> > > > >	Q1: CD4+&CD8a-	11.3	2677				CD4-&CD8a+	1.29	0.87	0.75	1.29	2.03	1.3	1.32	1.3	5.82	5.2	3.21	3.66	16.6	15.2	13.1	28	16.3	13.3	9.85
> > > > >	Q2: CD4+&CD8a+	1.9	452				CD4-&CD8a-	88.8	88.7	89.1	88	88.9	90.5	91.2	90.4	81.4	79	83.3	89.6	70.5	71.6	76	49.7	74.3	77.1	84.4
> > > > >	Q3: CD4-&CD8a+	15.2	3618
> > > > >	Q4: CD4-&CD8a-	71.6	16991
	T cell_F(3)_048.fcs		200000
>	tumor	97.6	195116
> >	Single cell	93.5	182402
> > >	Live	88.4	161203
> > > >	CD45.2+	44.3	71377
> > > > >	B220+	42	29987
> > > > >	CD3+	24.4	17412
> > > >	CD45.2+&CD3+	14.7	23752
> > > > >	Q1: CD4+&CD8a-	9.71	2307
> > > > >	Q2: CD4+&CD8a+	1.19	282
> > > > >	Q3: CD4-&CD8a+	13.1	3101
> > > > >	Q4: CD4-&CD8a-	76	18062
	T cell_F+C(1)_050.fcs		200000
>	tumor	96.7	193431
> >	Single cell	86.8	167959
> > >	Live	84.8	142471
> > > >	CD45.2+	28.1	40052
> > > > >	B220+	57.7	23117
> > > > >	CD3+	39.6	15870
> > > >	CD45.2+&CD3+	12.9	18396
> > > > >	Q1: CD4+&CD8a-	19.6	3603
> > > > >	Q2: CD4+&CD8a+	2.72	501
> > > > >	Q3: CD4-&CD8a+	28	5158
> > > > >	Q4: CD4-&CD8a-	49.7	9134
	T cell_F+C(2)_051.fcs		200000
>	tumor	97.7	195424
> >	Single cell	92.8	181367
> > >	Live	91	164996
> > > >	CD45.2+	28.7	47283
> > > > >	B220+	53.6	25354
> > > > >	CD3+	33.6	15877
> > > >	CD45.2+&CD3+	12	19822
> > > > >	Q1: CD4+&CD8a-	8.03	1591
> > > > >	Q2: CD4+&CD8a+	1.31	259
> > > > >	Q3: CD4-&CD8a+	16.3	3239
> > > > >	Q4: CD4-&CD8a-	74.3	14733
	T cell_F+C(3)_052.fcs		200000
>	tumor	97.2	194492
> >	Single cell	94.3	183345
> > >	Live	85.8	157355
> > > >	CD45.2+	14	22079
> > > > >	B220+	65.3	14420
> > > > >	CD3+	44.5	9817
> > > >	CD45.2+&CD3+	7.59	11944
> > > > >	Q1: CD4+&CD8a-	9	1075
> > > > >	Q2: CD4+&CD8a+	0.59	70
> > > > >	Q3: CD4-&CD8a+	13.3	1585
> > > > >	Q4: CD4-&CD8a-	77.1	9214
	T cell_F+C(4)_053.fcs		200000
>	tumor	97.3	194698
> >	Single cell	93.8	182558
> > >	Live	86.7	158213
> > > >	CD45.2+	23.9	37797
> > > > >	B220+	61.6	23266
> > > > >	CD3+	37.6	14209
> > > >	CD45.2+&CD3+	11.5	18123
> > > > >	Q1: CD4+&CD8a-	5.22	946
> > > > >	Q2: CD4+&CD8a+	0.5	91
> > > > >	Q3: CD4-&CD8a+	9.85	1785
> > > > >	Q4: CD4-&CD8a-	84.4	15301
	T cell_PBS(1)_034.fcs		200000
>	tumor	87.4	174729
> >	Single cell	92.8	162189
> > >	Live	30.6	49589
> > > >	CD45.2+	11	5451
> > > > >	B220+	66.9	3647
> > > > >	CD3+	42.6	2322
> > > >	CD45.2+&CD3+	5.64	2798
> > > > >	Q1: CD4+&CD8a-	9.04	253
> > > > >	Q2: CD4+&CD8a+	0.89	25
> > > > >	Q3: CD4-&CD8a+	1.29	36
> > > > >	Q4: CD4-&CD8a-	88.8	2484
	T cell_PBS(2)_035.fcs		200000
>	tumor	89.1	178275
> >	Single cell	92.1	164261
> > >	Live	43.5	71373
> > > >	CD45.2+	5.34	3809
> > > > >	B220+	66.3	2527
> > > > >	CD3+	50	1903
> > > >	CD45.2+&CD3+	3.08	2195
> > > > >	Q1: CD4+&CD8a-	10.1	222
> > > > >	Q2: CD4+&CD8a+	0.32	7
> > > > >	Q3: CD4-&CD8a+	0.87	19
> > > > >	Q4: CD4-&CD8a-	88.7	1947
	T cell_PBS(3)_036.fcs		200000
>	tumor	87	173910
> >	Single cell	93.4	162444
> > >	Live	25.1	40841
> > > >	CD45.2+	13.8	5619
> > > > >	B220+	63.1	3545
> > > > >	CD3+	45.2	2542
> > > >	CD45.2+&CD3+	7.48	3053
> > > > >	Q1: CD4+&CD8a-	9.83	300
> > > > >	Q2: CD4+&CD8a+	0.29	9
> > > > >	Q3: CD4-&CD8a+	0.75	23
> > > > >	Q4: CD4-&CD8a-	89.1	2721
	T cell_PBS(4)_037.fcs		200000
>	tumor	87.6	175126
> >	Single cell	93.6	163864
> > >	Live	27.1	44360
> > > >	CD45.2+	14.7	6517
> > > > >	B220+	74.3	4844
> > > > >	CD3+	56.7	3696
> > > >	CD45.2+&CD3+	9.44	4186
> > > > >	Q1: CD4+&CD8a-	10.4	436
> > > > >	Q2: CD4+&CD8a+	0.26	11
> > > > >	Q3: CD4-&CD8a+	1.29	54
> > > > >	Q4: CD4-&CD8a-	88	3685
	T cell_PBS+C(1)_038.fcs		200000
>	tumor	92.1	184246
> >	Single cell	93.2	171778
> > >	Live	55.4	95191
> > > >	CD45.2+	7.99	7603
> > > > >	B220+	55.6	4225
> > > > >	CD3+	35.8	2724
> > > >	CD45.2+&CD3+	3.58	3406
> > > > >	Q1: CD4+&CD8a-	8.72	297
> > > > >	Q2: CD4+&CD8a+	0.32	11
> > > > >	Q3: CD4-&CD8a+	2.03	69
> > > > >	Q4: CD4-&CD8a-	88.9	3029
	T cell_PBS+C(2)_039.fcs		200000
>	tumor	89.8	179541
> >	Single cell	93.7	168160
> > >	Live	49.4	83089
> > > >	CD45.2+	7.93	6592
> > > > >	B220+	73	4813
> > > > >	CD3+	57.3	3774
> > > >	CD45.2+&CD3+	5.11	4242
> > > > >	Q1: CD4+&CD8a-	8.06	342
> > > > >	Q2: CD4+&CD8a+	0.14	6
> > > > >	Q3: CD4-&CD8a+	1.3	55
> > > > >	Q4: CD4-&CD8a-	90.5	3839
	T cell_PBS+C(3)_040.fcs		200000
>	tumor	92.1	184241
> >	Single cell	95	175036
> > >	Live	57.8	101088
> > > >	CD45.2+	10.3	10413
> > > > >	B220+	65.4	6805
> > > > >	CD3+	49.3	5132
> > > >	CD45.2+&CD3+	5.84	5903
> > > > >	Q1: CD4+&CD8a-	7.17	423
> > > > >	Q2: CD4+&CD8a+	0.3	18
> > > > >	Q3: CD4-&CD8a+	1.32	78
> > > > >	Q4: CD4-&CD8a-	91.2	5384
	T cell_PBS+C(4)_041.fcs		200000
>	tumor	88.3	176662
> >	Single cell	94.6	167098
> > >	Live	29.4	49113
> > > >	CD45.2+	9.5	4668
> > > > >	B220+	65.9	3076
> > > > >	CD3+	51.2	2389
> > > >	CD45.2+&CD3+	5.49	2697
> > > > >	Q1: CD4+&CD8a-	7.97	215
> > > > >	Q2: CD4+&CD8a+	0.37	10
> > > > >	Q3: CD4-&CD8a+	1.3	35
> > > > >	Q4: CD4-&CD8a-	90.4	2437
	T cell_PE-Cy7 control_054.fcs		200000
	T cell_P3(1)_042.fcs		200000
>	tumor	88.5	177089
> >	Single cell	94.5	167312
> > >	Live	53.7	89813
> > > >	CD45.2+	25.9	23272
> > > > >	B220+	46.1	10736
> > > > >	CD3+	27.1	6309
> > > >	CD45.2+&CD3+	9.24	8298
> > > > >	Q1: CD4+&CD8a-	12.2	1012
> > > > >	Q2: CD4+&CD8a+	0.58	48
> > > > >	Q3: CD4-&CD8a+	5.82	483
> > > > >	Q4: CD4-&CD8a-	81.4	6755
	T cell_P3(2)_043.fcs		200000
>	tumor	85.2	170343
> >	Single cell	93.6	159366
> > >	Live	49.1	78320
> > > >	CD45.2+	21.8	17083
> > > > >	B220+	38.8	6620
> > > > >	CD3+	22.6	3853
> > > >	CD45.2+&CD3+	6.87	5384
> > > > >	Q1: CD4+&CD8a-	15.3	824
> > > > >	Q2: CD4+&CD8a+	0.45	24
> > > > >	Q3: CD4-&CD8a+	5.2	280
> > > > >	Q4: CD4-&CD8a-	79	4256
	T cell_P3(3)_044.fcs		200000
>	tumor	87.9	175755
> >	Single cell	93.6	164511
> > >	Live	41	67529
> > > >	CD45.2+	17.5	11821
> > > > >	B220+	58.7	6941
> > > > >	CD3+	38.8	4589
> > > >	CD45.2+&CD3+	8.55	5771
> > > > >	Q1: CD4+&CD8a-	13.2	762
> > > > >	Q2: CD4+&CD8a+	0.26	15
> > > > >	Q3: CD4-&CD8a+	3.21	185
> > > > >	Q4: CD4-&CD8a-	83.3	4809
	T cell_P3(4)_045.fcs		200000
>	tumor	96.5	192963
> >	Single cell	93.1	179579
> > >	Live	83.4	149816
> > > >	CD45.2+	15.4	22999
> > > > >	B220+	76.8	17657
> > > > >	CD3+	60.6	13928
> > > >	CD45.2+&CD3+	10.4	15558
> > > > >	Q1: CD4+&CD8a-	6.41	998
> > > > >	Q2: CD4+&CD8a+	0.33	52
> > > > >	Q3: CD4-&CD8a+	3.66	569
> > > > >	Q4: CD4-&CD8a-	89.6	13939
	T cell_3x10e6_033.fcs		500000

## Sheet: Figure 2 B M&CD45.2&CD3_2
	Name	Statistic	#Cells			F=Caerin	C=Clodronate		P3=Control
	C CD86+CD206_BV421 control_080.fcs		200000
	C CD86+CD206_F(1)_071.fcs		200000
>	macrophages	9.83	19664				PBS(1)	PBS(2)	PBS(3)	PBS(4)	PBS+C(1)	PBS+C(2)	PBS+C(3)	PBS+C(4)	P3(1)	P3(2)	P3(3)	P3(4)	F(1)	F(2)	F(3)	F(4)	F+C(1)	F+C(2)	F+C(3)	F+C(4)
>	tumor	97.5	194994		macrophages	macrophages	1.06	1.87	1.48	1.54	1.99	1.95	1.06	1.68	5.7	1.64	3.61	2.28	9.83	9.83	11	7.74	5.96	6.09	6.87	7.69
> >	single cell	97.5	190050		tumor	tumor	84	86.3	85.8	85.6	90.2	87.4	91.2	86.9	92.7	92.4	95.4	92	97.5	97.3	97.1	94.8	94.9	96.2	93.9	91.9
> > >	Live	85.9	163262		single cell	single cell	98.7	98.8	98.5	98.7	98.2	98.1	98.2	97.6	98.1	98	97.5	97.8	97.5	97.6	96.6	98.1	97.9	96.9	96.8	96.5
> > > >	CD45.2+	30.6	49962		Live	Live	31	46.3	36.4	31.7	59.1	44.4	41.9	43.3	69.5	74.7	82.3	64.1	85.9	85.6	87.4	79.1	16.4	85.2	80.6	71.5
> > > >	CD45.2+&CD3-	26	42453		CD45.2+	CD45.2+	9.81	9.23	9.94	11.5	6.11	9.4	5.45	8.38	23	6.39	9.69	11.1	30.6	31.2	40.3	22	27.8	19.1	20.9	24.2
> > > > >	CD11b+	91	38626		CD45.2+&CD3-	CD45.2+&CD3-	9.4	8.95	9.44	10.8	5.7	8.86	5.2	7.81	21.1	6.01	8.8	10.4	26	26.4	35.4	19.9	19.3	17.2	18.5	21.7
> > > > > >	Q1: Comp-APC-A- , Comp-PE-A+	44.5	17171		CD11b+	CD11b+	95.5	96.4	96.5	96.6	96.6	96.3	96	89.8	88	93.3	90.3	90.6	91	90.7	86.3	91.7	57.5	81.5	88.6	93.2
> > > > > > >	CD86+	87.7	15051		Q1: Comp-APC-A- , Comp-PE-A+	F4/80+ and Ly6C-	63.7	68.5	62.4	59.5	68.9	56.9	54.8	61.1	46.2	55	59.1	46.6	44.5	44.3	39.3	56.1	37.5	48.7	45	49.1
> > > > > > >	CD206+	12.5	2140			CD86+	91	88.8	93.5	94.6	97.1	96.1	92.8	95	87.4	85.4	93.2	83.7	87.7	87.7	82.6	90.9	98.4	87.9	92.2	90.2
> > > > > >	Q2: Comp-APC-A+ , Comp-PE-A+	49.9	19264			CD206+	75.6	76.9	76	72.7	73.9	74.4	64.3	63.5	30.1	51.5	59.2	36.8	12.5	15.1	16	18	73.2	18.7	18.4	20.5
> > > > > > >	CD86+	74.5	14343		Q2: Comp-APC-A+ , Comp-PE-A+	F4/80+ and Ly6C+	21.4	16.5	21	28.7	22.5	34.3	33.4	29.4	47	27.9	33.5	40.6	49.9	50.3	52.1	38.6	53.9	46.9	51.6	47.3
> > > > > > >	CD206+	0.91	175			CD86+	68.9	61.7	70.6	75.1	63.7	67.2	60.7	65.3	55.7	56.7	61.3	51.4	74.5	73.7	73	65.7	83.4	65.7	74.5	67.6
> > > > > >	Q3: Comp-APC-A+ , Comp-PE-A-	3.15	1217			CD206+	15.5	17.3	19.3	13.4	12.7	18.1	18	14.8	1.86	3.83	8.07	3.42	0.91	1.16	1.31	1.36	22.6	1.72	2.34	2.53
> > > > > > >	CD86+	43	523		Q3: Comp-APC-A+ , Comp-PE-A-	F4/80+ and Ly6C+	8.05	9.65	10.9	6.67	5.96	6.26	8.27	6.43	5.1	8.51	4.17	9.59	3.15	2.9	5.23	3.24	4.97	2.91	2.06	2.06
> > > > > > >	CD206+	0.16	2			CD86+	14.6	5.47	14.9	15.5	7.58	15.8	8.06	12.3	20.8	11.8	13.8	15.5	43	37.9	31.4	26.8	53.8	27.5	22	20.8
> > > > > >	Q4: Comp-APC-A- , Comp-PE-A-	2.52	974			CD206+	4.85	2.74	3.27	2.41	0.87	2.71	0.65	1.51	0.25	0.62	0.59	0.58	0.16	0.89	0.15	0.81	1.18	0.15	0.2	0.19
> > > > > > >	CD86+	41.2	401		Q4: Comp-APC-A- , Comp-PE-A-	F4/80- and Ly6C-	6.9	5.31	5.71	5.13	2.62	2.45	3.47	3.06	1.7	8.61	3.2	3.21	2.52	2.51	3.44	2.03	3.62	1.51	1.35	1.52
> > > > > > >	CD206+	0.82	8			CD86+	50	44.5	53.1	67.2	60.9	62.9	47.7	53.8	53.6	22.1	35.9	39.5	41.2	39.1	32.7	56.1	64.2	53	52.3	54.5
> > > > >	macrophages	48	20395			CD206+	11.3	14.6	13.8	12.9	1.99	10.1	9.23	10.1	3.76	5.97	4.1	3.44	0.82	0.92	0.52	1.65	8.94	1.48	2.15	2.56
> > > > > >	Q1: Comp-BV421-A- , Comp-PE-Cy7-A+	62.6	12772		macrophages	CD45+CD3-之下	49.4	57.2	53.3	54.8	66.7	56.6	55.3	53.9	44.3	44.1	54.2	39.9	48	47.4	38.5	56	26	47.8	53.9	56.5
> > > > > >	Q2: Comp-BV421-A+ , Comp-PE-Cy7-A+	9.11	1859		Q1: Comp-BV421-A- , Comp-PE-Cy7-A+		10.2	10.1	11.2	16.7	20.2	18.6	23.9	25.8	49.7	27.5	29.9	38.8	62.6	59.7	49.4	59.8	19	56.6	67.4	60.4
> > > > > >	Q3: Comp-BV421-A+ , Comp-PE-Cy7-A-	2.32	474		Q2: Comp-BV421-A+ , Comp-PE-Cy7-A+		73.6	65.1	72.8	66.8	73	72.4	60	62.1	24.5	42.7	55.1	31	9.11	11.3	9.8	12.8	80.3	13.7	14.6	15.4
> > > > > >	Q4: Comp-BV421-A- , Comp-PE-Cy7-A-	25.9	5290		Q3: Comp-BV421-A+ , Comp-PE-Cy7-A-		12.7	19.7	11.2	10.6	3.57	6.06	6.81	6.27	4.59	13.7	6.24	7.97	2.32	2.91	5.16	4.64	0.13	3.42	1.14	3.5
> > > >	macrophages	11.9	19390		Q4: Comp-BV421-A- , Comp-PE-Cy7-A-		3.56	5.22	4.78	5.86	3.22	2.86	9.31	5.81	21.3	16.1	8.71	22.2	25.9	26.1	35.6	22.8	0.59	26.3	16.9	20.7
	C CD86+CD206_F(2)_072.fcs		200000		macrophages	live之下	4.26	4.78	4.64	5.54	3.69	4.83	2.71	4.01	8.75	2.44	4.54	3.8	11.9	11.9	12.9	10.6	5.07	7.67	9.4	11.6
>	macrophages	9.83	19662
>	tumor	97.3	194503
> >	single cell	97.6	189833				PBS(1)	PBS(2)	PBS(3)	PBS(4)	PBS+C(1)	PBS+C(2)	PBS+C(3)	PBS+C(4)	P3(1)	P3(2)	P3(3)	P3(4)	F(1)	F(2)	F(3)	F(4)	F+C(1)	F+C(2)	F+C(3)	F+C(4)
> > >	Live	85.6	162539			F4/80+ and Ly6C-	63.7	68.5	62.4	59.5	68.9	56.9	54.8	61.1	46.2	55	59.1	46.6	44.5	44.3	39.3	56.1	37.5	48.7	45	49.1
> > > >	CD45.2+	31.2	50740			F4/80+ and Ly6C+	21.4	16.5	21	28.7	22.5	34.3	33.4	29.4	47	27.9	33.5	40.6	49.9	50.3	52.1	38.6	53.9	46.9	51.6	47.3
> > > >	CD45.2+&CD3-	26.4	42858			F4/80+ and Ly6C+	8.05	9.65	10.9	6.67	5.96	6.26	8.27	6.43	5.1	8.51	4.17	9.59	3.15	2.9	5.23	3.24	4.97	2.91	2.06	2.06
> > > > >	CD11b+	90.7	38885			F4/80- and Ly6C-	6.9	5.31	5.71	5.13	2.62	2.45	3.47	3.06	1.7	8.61	3.2	3.21	2.52	2.51	3.44	2.03	3.62	1.51	1.35	1.52
> > > > > >	Q1: Comp-APC-A- , Comp-PE-A+	44.3	17214
> > > > > > >	CD86+	87.7	15103
> > > > > > >	CD206+	15.1	2601
> > > > > >	Q2: Comp-APC-A+ , Comp-PE-A+	50.3	19568		CD86+		PBS(1)	PBS(2)	PBS(3)	PBS(4)	PBS+C(1)	PBS+C(2)	PBS+C(3)	PBS+C(4)	P3(1)	P3(2)	P3(3)	P3(4)	F(1)	F(2)	F(3)	F(4)	F+C(1)	F+C(2)	F+C(3)	F+C(4)
> > > > > > >	CD86+	73.7	14419			F4/80+ and Ly6C-	91	88.8	93.5	94.6	97.1	96.1	92.8	95	87.4	85.4	93.2	83.7	87.7	87.7	82.6	90.9	98.4	87.9	92.2	90.2
> > > > > > >	CD206+	1.16	227			F4/80+ and Ly6C+	68.9	61.7	70.6	75.1	63.7	67.2	60.7	65.3	55.7	56.7	61.3	51.4	74.5	73.7	73	65.7	83.4	65.7	74.5	67.6
> > > > > >	Q3: Comp-APC-A+ , Comp-PE-A-	2.9	1128			F4/80+ and Ly6C+	14.6	5.47	14.9	15.5	7.58	15.8	8.06	12.3	20.8	11.8	13.8	15.5	43	37.9	31.4	26.8	53.8	27.5	22	20.8
> > > > > > >	CD86+	37.9	427			F4/80- and Ly6C-	50	44.5	53.1	67.2	60.9	62.9	47.7	53.8	53.6	22.1	35.9	39.5	41.2	39.1	32.7	56.1	64.2	53	52.3	54.5
> > > > > > >	CD206+	0.89	10
> > > > > >	Q4: Comp-APC-A- , Comp-PE-A-	2.51	975
> > > > > > >	CD86+	39.1	381
> > > > > > >	CD206+	0.92	9		CD206+		PBS(1)	PBS(2)	PBS(3)	PBS(4)	PBS+C(1)	PBS+C(2)	PBS+C(3)	PBS+C(4)	P3(1)	P3(2)	P3(3)	P3(4)	F(1)	F(2)	F(3)	F(4)	F+C(1)	F+C(2)	F+C(3)	F+C(4)
> > > > >	macrophages	47.4	20296			F4/80+ and Ly6C-	75.6	76.9	76	72.7	73.9	74.4	64.3	63.5	30.1	51.5	59.2	36.8	12.5	15.1	16	18	73.2	18.7	18.4	20.5
> > > > > >	Q1: Comp-BV421-A- , Comp-PE-Cy7-A+	59.7	12122			F4/80+ and Ly6C+	15.5	17.3	19.3	13.4	12.7	18.1	18	14.8	1.86	3.83	8.07	3.42	0.91	1.16	1.31	1.36	22.6	1.72	2.34	2.53
> > > > > >	Q2: Comp-BV421-A+ , Comp-PE-Cy7-A+	11.3	2286			F4/80+ and Ly6C+	4.85	2.74	3.27	2.41	0.87	2.71	0.65	1.51	0.25	0.62	0.59	0.58	0.16	0.89	0.15	0.81	1.18	0.15	0.2	0.19
> > > > > >	Q3: Comp-BV421-A+ , Comp-PE-Cy7-A-	2.91	591			F4/80- and Ly6C-	11.3	14.6	13.8	12.9	1.99	10.1	9.23	10.1	3.76	5.97	4.1	3.44	0.82	0.92	0.52	1.65	8.94	1.48	2.15	2.56
> > > > > >	Q4: Comp-BV421-A- , Comp-PE-Cy7-A-	26.1	5297
> > > >	macrophages	11.9	19314
	C CD86+CD206_F(3)_073.fcs		200000				PBS(1)	PBS(2)	PBS(3)	PBS(4)	PBS+C(1)	PBS+C(2)	PBS+C(3)	PBS+C(4)	P3(1)	P3(2)	P3(3)	P3(4)	F(1)	F(2)	F(3)	F(4)	F+C(1)	F+C(2)	F+C(3)	F+C(4)
>	macrophages	11	21926			CD45.2+	9.81	9.23	9.94	11.5	6.11	9.4	5.45	8.38	23	6.39	9.69	11.1	30.6	31.2	40.3	22	27.8	19.1	20.9	24.2
>	tumor	97.1	194270			macrophages	4.26	4.78	4.64	5.54	3.69	4.83	2.71	4.01	8.75	2.44	4.54	3.8	11.9	11.9	12.9	10.6	5.07	7.67	9.4	11.6
> >	single cell	96.6	187570
> > >	Live	87.4	164017
> > > >	CD45.2+	40.3	66179
> > > >	CD45.2+&CD3-	35.4	58091
> > > > >	CD11b+	86.3	50117
> > > > > >	Q1: Comp-APC-A- , Comp-PE-A+	39.3	19672
> > > > > > >	CD86+	82.6	16256
> > > > > > >	CD206+	16	3155
> > > > > >	Q2: Comp-APC-A+ , Comp-PE-A+	52.1	26099
> > > > > > >	CD86+	73	19053
> > > > > > >	CD206+	1.31	342
> > > > > >	Q3: Comp-APC-A+ , Comp-PE-A-	5.23	2621
> > > > > > >	CD86+	31.4	822
> > > > > > >	CD206+	0.15	4
> > > > > >	Q4: Comp-APC-A- , Comp-PE-A-	3.44	1725
> > > > > > >	CD86+	32.7	564
> > > > > > >	CD206+	0.52	9
> > > > >	macrophages	38.5	22377
> > > > > >	Q1: Comp-BV421-A- , Comp-PE-Cy7-A+	49.4	11060
> > > > > >	Q2: Comp-BV421-A+ , Comp-PE-Cy7-A+	9.8	2192
> > > > > >	Q3: Comp-BV421-A+ , Comp-PE-Cy7-A-	5.16	1155
> > > > > >	Q4: Comp-BV421-A- , Comp-PE-Cy7-A-	35.6	7970
> > > >	macrophages	12.9	21106
	C CD86+CD206_F(4)_074.fcs		200000
>	macrophages	7.74	15474
>	tumor	94.8	189588
> >	single cell	98.1	185947
> > >	Live	79.1	147163
> > > >	CD45.2+	22	32351
> > > >	CD45.2+&CD3-	19.9	29239
> > > > >	CD11b+	91.7	26824
> > > > > >	Q1: Comp-APC-A- , Comp-PE-A+	56.1	15056
> > > > > > >	CD86+	90.9	13683
> > > > > > >	CD206+	18	2704
> > > > > >	Q2: Comp-APC-A+ , Comp-PE-A+	38.6	10355
> > > > > > >	CD86+	65.7	6804
> > > > > > >	CD206+	1.36	141
> > > > > >	Q3: Comp-APC-A+ , Comp-PE-A-	3.24	869
> > > > > > >	CD86+	26.8	233
> > > > > > >	CD206+	0.81	7
> > > > > >	Q4: Comp-APC-A- , Comp-PE-A-	2.03	544
> > > > > > >	CD86+	56.1	305
> > > > > > >	CD206+	1.65	9
> > > > >	macrophages	56	16364
> > > > > >	Q1: Comp-BV421-A- , Comp-PE-Cy7-A+	59.8	9785
> > > > > >	Q2: Comp-BV421-A+ , Comp-PE-Cy7-A+	12.8	2090
> > > > > >	Q3: Comp-BV421-A+ , Comp-PE-Cy7-A-	4.64	759
> > > > > >	Q4: Comp-BV421-A- , Comp-PE-Cy7-A-	22.8	3730
> > > >	macrophages	10.6	15527
	C CD86+CD206_F+C(1)_075.fcs		200000
>	macrophages	5.96	11914
>	tumor	94.9	189784
> >	single cell	97.9	185865
> > >	Live	16.4	30539
> > > >	CD45.2+	27.8	8475
> > > >	CD45.2+&CD3-	19.3	5905
> > > > >	CD11b+	57.5	3398
> > > > > >	Q1: Comp-APC-A- , Comp-PE-A+	37.5	1273
> > > > > > >	CD86+	98.4	1252
> > > > > > >	CD206+	73.2	932
> > > > > >	Q2: Comp-APC-A+ , Comp-PE-A+	53.9	1833
> > > > > > >	CD86+	83.4	1528
> > > > > > >	CD206+	22.6	415
> > > > > >	Q3: Comp-APC-A+ , Comp-PE-A-	4.97	169
> > > > > > >	CD86+	53.8	91
> > > > > > >	CD206+	1.18	2
> > > > > >	Q4: Comp-APC-A- , Comp-PE-A-	3.62	123
> > > > > > >	CD86+	64.2	79
> > > > > > >	CD206+	8.94	11
> > > > >	macrophages	26	1537
> > > > > >	Q1: Comp-BV421-A- , Comp-PE-Cy7-A+	19	292
> > > > > >	Q2: Comp-BV421-A+ , Comp-PE-Cy7-A+	80.3	1234
> > > > > >	Q3: Comp-BV421-A+ , Comp-PE-Cy7-A-	0.13	2
> > > > > >	Q4: Comp-BV421-A- , Comp-PE-Cy7-A-	0.59	9
> > > >	macrophages	5.07	1547
	C CD86+CD206_F+C(2)_076.fcs		200000
>	macrophages	6.09	12176
>	tumor	96.2	192329
> >	single cell	96.9	186395
> > >	Live	85.2	158814
> > > >	CD45.2+	19.1	30345
> > > >	CD45.2+&CD3-	17.2	27392
> > > > >	CD11b+	81.5	22313
> > > > > >	Q1: Comp-APC-A- , Comp-PE-A+	48.7	10868
> > > > > > >	CD86+	87.9	9556
> > > > > > >	CD206+	18.7	2036
> > > > > >	Q2: Comp-APC-A+ , Comp-PE-A+	46.9	10457
> > > > > > >	CD86+	65.7	6869
> > > > > > >	CD206+	1.72	180
> > > > > >	Q3: Comp-APC-A+ , Comp-PE-A-	2.91	650
> > > > > > >	CD86+	27.5	179
> > > > > > >	CD206+	0.15	1
> > > > > >	Q4: Comp-APC-A- , Comp-PE-A-	1.51	338
> > > > > > >	CD86+	53	179
> > > > > > >	CD206+	1.48	5
> > > > >	macrophages	47.8	13082
> > > > > >	Q1: Comp-BV421-A- , Comp-PE-Cy7-A+	56.6	7408
> > > > > >	Q2: Comp-BV421-A+ , Comp-PE-Cy7-A+	13.7	1786
> > > > > >	Q3: Comp-BV421-A+ , Comp-PE-Cy7-A-	3.42	447
> > > > > >	Q4: Comp-BV421-A- , Comp-PE-Cy7-A-	26.3	3441
> > > >	macrophages	7.67	12174
	C CD86+CD206_F+C(3)_077.fcs		200000
>	macrophages	6.87	13735
>	tumor	93.9	187894
> >	single cell	96.8	181844
> > >	Live	80.6	146639
> > > >	CD45.2+	20.9	30702
> > > >	CD45.2+&CD3-	18.5	27086
> > > > >	CD11b+	88.6	24009
> > > > > >	Q1: Comp-APC-A- , Comp-PE-A+	45	10807
> > > > > > >	CD86+	92.2	9968
> > > > > > >	CD206+	18.4	1987
> > > > > >	Q2: Comp-APC-A+ , Comp-PE-A+	51.6	12382
> > > > > > >	CD86+	74.5	9224
> > > > > > >	CD206+	2.34	290
> > > > > >	Q3: Comp-APC-A+ , Comp-PE-A-	2.06	495
> > > > > > >	CD86+	22	109
> > > > > > >	CD206+	0.2	1
> > > > > >	Q4: Comp-APC-A- , Comp-PE-A-	1.35	325
> > > > > > >	CD86+	52.3	170
> > > > > > >	CD206+	2.15	7
> > > > >	macrophages	53.9	14592
> > > > > >	Q1: Comp-BV421-A- , Comp-PE-Cy7-A+	67.4	9840
> > > > > >	Q2: Comp-BV421-A+ , Comp-PE-Cy7-A+	14.6	2126
> > > > > >	Q3: Comp-BV421-A+ , Comp-PE-Cy7-A-	1.14	166
> > > > > >	Q4: Comp-BV421-A- , Comp-PE-Cy7-A-	16.9	2460
> > > >	macrophages	9.4	13786
	C CD86+CD206_F+C(4)_078.fcs		200000
>	macrophages	7.69	15388
>	tumor	91.9	183744
> >	single cell	96.5	177399
> > >	Live	71.5	126849
> > > >	CD45.2+	24.2	30702
> > > >	CD45.2+&CD3-	21.7	27538
> > > > >	CD11b+	93.2	25676
> > > > > >	Q1: Comp-APC-A- , Comp-PE-A+	49.1	12602
> > > > > > >	CD86+	90.2	11372
> > > > > > >	CD206+	20.5	2585
> > > > > >	Q2: Comp-APC-A+ , Comp-PE-A+	47.3	12154
> > > > > > >	CD86+	67.6	8217
> > > > > > >	CD206+	2.53	308
> > > > > >	Q3: Comp-APC-A+ , Comp-PE-A-	2.06	529
> > > > > > >	CD86+	20.8	110
> > > > > > >	CD206+	0.19	1
> > > > > >	Q4: Comp-APC-A- , Comp-PE-A-	1.52	391
> > > > > > >	CD86+	54.5	213
> > > > > > >	CD206+	2.56	10
> > > > >	macrophages	56.5	15571
> > > > > >	Q1: Comp-BV421-A- , Comp-PE-Cy7-A+	60.4	9404
> > > > > >	Q2: Comp-BV421-A+ , Comp-PE-Cy7-A+	15.4	2400
> > > > > >	Q3: Comp-BV421-A+ , Comp-PE-Cy7-A-	3.5	545
> > > > > >	Q4: Comp-BV421-A- , Comp-PE-Cy7-A-	20.7	3222
> > > >	macrophages	11.6	14659
	C CD86+CD206_PBS(1)_059.fcs		200000
>	macrophages	1.06	2127
>	tumor	84	168083
> >	single cell	98.7	165919
> > >	Live	31	51366
> > > >	CD45.2+	9.81	5039
> > > >	CD45.2+&CD3-	9.4	4827
> > > > >	CD11b+	95.5	4608
> > > > > >	Q1: Comp-APC-A- , Comp-PE-A+	63.7	2934
> > > > > > >	CD86+	91	2671
> > > > > > >	CD206+	75.6	2219
> > > > > >	Q2: Comp-APC-A+ , Comp-PE-A+	21.4	985
> > > > > > >	CD86+	68.9	679
> > > > > > >	CD206+	15.5	153
> > > > > >	Q3: Comp-APC-A+ , Comp-PE-A-	8.05	371
> > > > > > >	CD86+	14.6	54
> > > > > > >	CD206+	4.85	18
> > > > > >	Q4: Comp-APC-A- , Comp-PE-A-	6.9	318
> > > > > > >	CD86+	50	159
> > > > > > >	CD206+	11.3	36
> > > > >	macrophages	49.4	2386
> > > > > >	Q1: Comp-BV421-A- , Comp-PE-Cy7-A+	10.2	244
> > > > > >	Q2: Comp-BV421-A+ , Comp-PE-Cy7-A+	73.6	1755
> > > > > >	Q3: Comp-BV421-A+ , Comp-PE-Cy7-A-	12.7	302
> > > > > >	Q4: Comp-BV421-A- , Comp-PE-Cy7-A-	3.56	85
> > > >	macrophages	4.26	2190
	C CD86+CD206_PBS(2)_060.fcs		200000
>	macrophages	1.87	3740
>	tumor	86.3	172661
> >	single cell	98.8	170618
> > >	Live	46.3	78967
> > > >	CD45.2+	9.23	7287
> > > >	CD45.2+&CD3-	8.95	7070
> > > > >	CD11b+	96.4	6816
> > > > > >	Q1: Comp-APC-A- , Comp-PE-A+	68.5	4672
> > > > > > >	CD86+	88.8	4149
> > > > > > >	CD206+	76.9	3595
> > > > > >	Q2: Comp-APC-A+ , Comp-PE-A+	16.5	1124
> > > > > > >	CD86+	61.7	693
> > > > > > >	CD206+	17.3	194
> > > > > >	Q3: Comp-APC-A+ , Comp-PE-A-	9.65	658
> > > > > > >	CD86+	5.47	36
> > > > > > >	CD206+	2.74	18
> > > > > >	Q4: Comp-APC-A- , Comp-PE-A-	5.31	362
> > > > > > >	CD86+	44.5	161
> > > > > > >	CD206+	14.6	53
> > > > >	macrophages	57.2	4044
> > > > > >	Q1: Comp-BV421-A- , Comp-PE-Cy7-A+	10.1	407
> > > > > >	Q2: Comp-BV421-A+ , Comp-PE-Cy7-A+	65.1	2631
> > > > > >	Q3: Comp-BV421-A+ , Comp-PE-Cy7-A-	19.7	795
> > > > > >	Q4: Comp-BV421-A- , Comp-PE-Cy7-A-	5.22	211
> > > >	macrophages	4.78	3773
	C CD86+CD206_PBS(3)_061.fcs		200000
>	macrophages	1.48	2970
>	tumor	85.8	171644
> >	single cell	98.5	169068
> > >	Live	36.4	61517
> > > >	CD45.2+	9.94	6115
> > > >	CD45.2+&CD3-	9.44	5810
> > > > >	CD11b+	96.5	5604
> > > > > >	Q1: Comp-APC-A- , Comp-PE-A+	62.4	3495
> > > > > > >	CD86+	93.5	3268
> > > > > > >	CD206+	76	2656
> > > > > >	Q2: Comp-APC-A+ , Comp-PE-A+	21	1177
> > > > > > >	CD86+	70.6	831
> > > > > > >	CD206+	19.3	227
> > > > > >	Q3: Comp-APC-A+ , Comp-PE-A-	10.9	612
> > > > > > >	CD86+	14.9	91
> > > > > > >	CD206+	3.27	20
> > > > > >	Q4: Comp-APC-A- , Comp-PE-A-	5.71	320
> > > > > > >	CD86+	53.1	170
> > > > > > >	CD206+	13.8	44
> > > > >	macrophages	53.3	3094
> > > > > >	Q1: Comp-BV421-A- , Comp-PE-Cy7-A+	11.2	348
> > > > > >	Q2: Comp-BV421-A+ , Comp-PE-Cy7-A+	72.8	2253
> > > > > >	Q3: Comp-BV421-A+ , Comp-PE-Cy7-A-	11.2	345
> > > > > >	Q4: Comp-BV421-A- , Comp-PE-Cy7-A-	4.78	148
> > > >	macrophages	4.64	2857
	C CD86+CD206_PBS(4)_062.fcs		200000
>	macrophages	1.54	3080
>	tumor	85.6	171162
> >	single cell	98.7	168920
> > >	Live	31.7	53548
> > > >	CD45.2+	11.5	6162
> > > >	CD45.2+&CD3-	10.8	5791
> > > > >	CD11b+	96.6	5592
> > > > > >	Q1: Comp-APC-A- , Comp-PE-A+	59.5	3325
> > > > > > >	CD86+	94.6	3147
> > > > > > >	CD206+	72.7	2418
> > > > > >	Q2: Comp-APC-A+ , Comp-PE-A+	28.7	1607
> > > > > > >	CD86+	75.1	1207
> > > > > > >	CD206+	13.4	216
> > > > > >	Q3: Comp-APC-A+ , Comp-PE-A-	6.67	373
> > > > > > >	CD86+	15.5	58
> > > > > > >	CD206+	2.41	9
> > > > > >	Q4: Comp-APC-A- , Comp-PE-A-	5.13	287
> > > > > > >	CD86+	67.2	193
> > > > > > >	CD206+	12.9	37
> > > > >	macrophages	54.8	3172
> > > > > >	Q1: Comp-BV421-A- , Comp-PE-Cy7-A+	16.7	530
> > > > > >	Q2: Comp-BV421-A+ , Comp-PE-Cy7-A+	66.8	2119
> > > > > >	Q3: Comp-BV421-A+ , Comp-PE-Cy7-A-	10.6	337
> > > > > >	Q4: Comp-BV421-A- , Comp-PE-Cy7-A-	5.86	186
> > > >	macrophages	5.54	2964
	C CD86+CD206_PBS+C(1)_063.fcs		200000
>	macrophages	1.99	3990
>	tumor	90.2	180301
> >	single cell	98.2	176990
> > >	Live	59.1	104677
> > > >	CD45.2+	6.11	6397
> > > >	CD45.2+&CD3-	5.7	5963
> > > > >	CD11b+	96.6	5758
> > > > > >	Q1: Comp-APC-A- , Comp-PE-A+	68.9	3966
> > > > > > >	CD86+	97.1	3851
> > > > > > >	CD206+	73.9	2930
> > > > > >	Q2: Comp-APC-A+ , Comp-PE-A+	22.5	1298
> > > > > > >	CD86+	63.7	827
> > > > > > >	CD206+	12.7	165
> > > > > >	Q3: Comp-APC-A+ , Comp-PE-A-	5.96	343
> > > > > > >	CD86+	7.58	26
> > > > > > >	CD206+	0.87	3
> > > > > >	Q4: Comp-APC-A- , Comp-PE-A-	2.62	151
> > > > > > >	CD86+	60.9	92
> > > > > > >	CD206+	1.99	3
> > > > >	macrophages	66.7	3976
> > > > > >	Q1: Comp-BV421-A- , Comp-PE-Cy7-A+	20.2	803
> > > > > >	Q2: Comp-BV421-A+ , Comp-PE-Cy7-A+	73	2903
> > > > > >	Q3: Comp-BV421-A+ , Comp-PE-Cy7-A-	3.57	142
> > > > > >	Q4: Comp-BV421-A- , Comp-PE-Cy7-A-	3.22	128
> > > >	macrophages	3.69	3866
	C CD86+CD206_PBS+C(2)_064.fcs		200000
>	macrophages	1.95	3898
>	tumor	87.4	174714
> >	single cell	98.1	171360
> > >	Live	44.4	76012
> > > >	CD45.2+	9.4	7142
> > > >	CD45.2+&CD3-	8.86	6736
> > > > >	CD11b+	96.3	6485
> > > > > >	Q1: Comp-APC-A- , Comp-PE-A+	56.9	3693
> > > > > > >	CD86+	96.1	3549
> > > > > > >	CD206+	74.4	2746
> > > > > >	Q2: Comp-APC-A+ , Comp-PE-A+	34.3	2227
> > > > > > >	CD86+	67.2	1497
> > > > > > >	CD206+	18.1	403
> > > > > >	Q3: Comp-APC-A+ , Comp-PE-A-	6.26	406
> > > > > > >	CD86+	15.8	64
> > > > > > >	CD206+	2.71	11
> > > > > >	Q4: Comp-APC-A- , Comp-PE-A-	2.45	159
> > > > > > >	CD86+	62.9	100
> > > > > > >	CD206+	10.1	16
> > > > >	macrophages	56.6	3811
> > > > > >	Q1: Comp-BV421-A- , Comp-PE-Cy7-A+	18.6	710
> > > > > >	Q2: Comp-BV421-A+ , Comp-PE-Cy7-A+	72.4	2761
> > > > > >	Q3: Comp-BV421-A+ , Comp-PE-Cy7-A-	6.06	231
> > > > > >	Q4: Comp-BV421-A- , Comp-PE-Cy7-A-	2.86	109
> > > >	macrophages	4.83	3674
	C CD86+CD206_PBS+C(3)_065.fcs		200000
>	macrophages	1.06	2128
>	tumor	91.2	182384
> >	single cell	98.2	179134
> > >	Live	41.9	75082
> > > >	CD45.2+	5.45	4092
> > > >	CD45.2+&CD3-	5.2	3904
> > > > >	CD11b+	96	3748
> > > > > >	Q1: Comp-APC-A- , Comp-PE-A+	54.8	2055
> > > > > > >	CD86+	92.8	1908
> > > > > > >	CD206+	64.3	1322
> > > > > >	Q2: Comp-APC-A+ , Comp-PE-A+	33.4	1253
> > > > > > >	CD86+	60.7	760
> > > > > > >	CD206+	18	225
> > > > > >	Q3: Comp-APC-A+ , Comp-PE-A-	8.27	310
> > > > > > >	CD86+	8.06	25
> > > > > > >	CD206+	0.65	2
> > > > > >	Q4: Comp-APC-A- , Comp-PE-A-	3.47	130
> > > > > > >	CD86+	47.7	62
> > > > > > >	CD206+	9.23	12
> > > > >	macrophages	55.3	2158
> > > > > >	Q1: Comp-BV421-A- , Comp-PE-Cy7-A+	23.9	515
> > > > > >	Q2: Comp-BV421-A+ , Comp-PE-Cy7-A+	60	1295
> > > > > >	Q3: Comp-BV421-A+ , Comp-PE-Cy7-A-	6.81	147
> > > > > >	Q4: Comp-BV421-A- , Comp-PE-Cy7-A-	9.31	201
> > > >	macrophages	2.71	2034
	C CD86+CD206_PBS+C(4)_066.fcs		200000
>	macrophages	1.68	3351
>	tumor	86.9	173844
> >	single cell	97.6	169708
> > >	Live	43.3	73553
> > > >	CD45.2+	8.38	6166
> > > >	CD45.2+&CD3-	7.81	5746
> > > > >	CD11b+	89.8	5161
> > > > > >	Q1: Comp-APC-A- , Comp-PE-A+	61.1	3154
> > > > > > >	CD86+	95	2996
> > > > > > >	CD206+	63.5	2004
> > > > > >	Q2: Comp-APC-A+ , Comp-PE-A+	29.4	1517
> > > > > > >	CD86+	65.3	990
> > > > > > >	CD206+	14.8	225
> > > > > >	Q3: Comp-APC-A+ , Comp-PE-A-	6.43	332
> > > > > > >	CD86+	12.3	41
> > > > > > >	CD206+	1.51	5
> > > > > >	Q4: Comp-APC-A- , Comp-PE-A-	3.06	158
> > > > > > >	CD86+	53.8	85
> > > > > > >	CD206+	10.1	16
> > > > >	macrophages	53.9	3096
> > > > > >	Q1: Comp-BV421-A- , Comp-PE-Cy7-A+	25.8	798
> > > > > >	Q2: Comp-BV421-A+ , Comp-PE-Cy7-A+	62.1	1924
> > > > > >	Q3: Comp-BV421-A+ , Comp-PE-Cy7-A-	6.27	194
> > > > > >	Q4: Comp-BV421-A- , Comp-PE-Cy7-A-	5.81	180
> > > >	macrophages	4.01	2951
	C CD86+CD206_PE-CY7 control_079.fcs		200000
	C CD86+CD206_P3(1)_067.fcs		200000
>	macrophages	5.7	11410
>	tumor	92.7	185422
> >	single cell	98.1	181834
> > >	Live	69.5	126430
> > > >	CD45.2+	23	29078
> > > >	CD45.2+&CD3-	21.1	26614
> > > > >	CD11b+	88	23430
> > > > > >	Q1: Comp-APC-A- , Comp-PE-A+	46.2	10825
> > > > > > >	CD86+	87.4	9463
> > > > > > >	CD206+	30.1	3254
> > > > > >	Q2: Comp-APC-A+ , Comp-PE-A+	47	11011
> > > > > > >	CD86+	55.7	6138
> > > > > > >	CD206+	1.86	205
> > > > > >	Q3: Comp-APC-A+ , Comp-PE-A-	5.1	1195
> > > > > > >	CD86+	20.8	248
> > > > > > >	CD206+	0.25	3
> > > > > >	Q4: Comp-APC-A- , Comp-PE-A-	1.7	399
> > > > > > >	CD86+	53.6	214
> > > > > > >	CD206+	3.76	15
> > > > >	macrophages	44.3	11799
> > > > > >	Q1: Comp-BV421-A- , Comp-PE-Cy7-A+	49.7	5859
> > > > > >	Q2: Comp-BV421-A+ , Comp-PE-Cy7-A+	24.5	2889
> > > > > >	Q3: Comp-BV421-A+ , Comp-PE-Cy7-A-	4.59	542
> > > > > >	Q4: Comp-BV421-A- , Comp-PE-Cy7-A-	21.3	2509
> > > >	macrophages	8.75	11067
	C CD86+CD206_P3(2)_068.fcs		200000
>	macrophages	1.64	3271
>	tumor	92.4	184763
> >	single cell	98	181017
> > >	Live	74.7	135211
> > > >	CD45.2+	6.39	8638
> > > >	CD45.2+&CD3-	6.01	8130
> > > > >	CD11b+	93.3	7583
> > > > > >	Q1: Comp-APC-A- , Comp-PE-A+	55	4172
> > > > > > >	CD86+	85.4	3561
> > > > > > >	CD206+	51.5	2147
> > > > > >	Q2: Comp-APC-A+ , Comp-PE-A+	27.9	2113
> > > > > > >	CD86+	56.7	1199
> > > > > > >	CD206+	3.83	81
> > > > > >	Q3: Comp-APC-A+ , Comp-PE-A-	8.51	645
> > > > > > >	CD86+	11.8	76
> > > > > > >	CD206+	0.62	4
> > > > > >	Q4: Comp-APC-A- , Comp-PE-A-	8.61	653
> > > > > > >	CD86+	22.1	144
> > > > > > >	CD206+	5.97	39
> > > > >	macrophages	44.1	3587
> > > > > >	Q1: Comp-BV421-A- , Comp-PE-Cy7-A+	27.5	988
> > > > > >	Q2: Comp-BV421-A+ , Comp-PE-Cy7-A+	42.7	1530
> > > > > >	Q3: Comp-BV421-A+ , Comp-PE-Cy7-A-	13.7	493
> > > > > >	Q4: Comp-BV421-A- , Comp-PE-Cy7-A-	16.1	576
> > > >	macrophages	2.44	3299
	C CD86+CD206_P3(3)_069.fcs		200000
>	macrophages	3.61	7212
>	tumor	95.4	190839
> >	single cell	97.5	186076
> > >	Live	82.3	153205
> > > >	CD45.2+	9.69	14851
> > > >	CD45.2+&CD3-	8.8	13481
> > > > >	CD11b+	90.3	12172
> > > > > >	Q1: Comp-APC-A- , Comp-PE-A+	59.1	7197
> > > > > > >	CD86+	93.2	6706
> > > > > > >	CD206+	59.2	4264
> > > > > >	Q2: Comp-APC-A+ , Comp-PE-A+	33.5	4077
> > > > > > >	CD86+	61.3	2498
> > > > > > >	CD206+	8.07	329
> > > > > >	Q3: Comp-APC-A+ , Comp-PE-A-	4.17	508
> > > > > > >	CD86+	13.8	70
> > > > > > >	CD206+	0.59	3
> > > > > >	Q4: Comp-APC-A- , Comp-PE-A-	3.2	390
> > > > > > >	CD86+	35.9	140
> > > > > > >	CD206+	4.1	16
> > > > >	macrophages	54.2	7312
> > > > > >	Q1: Comp-BV421-A- , Comp-PE-Cy7-A+	29.9	2189
> > > > > >	Q2: Comp-BV421-A+ , Comp-PE-Cy7-A+	55.1	4030
> > > > > >	Q3: Comp-BV421-A+ , Comp-PE-Cy7-A-	6.24	456
> > > > > >	Q4: Comp-BV421-A- , Comp-PE-Cy7-A-	8.71	637
> > > >	macrophages	4.54	6952
	C CD86+CD206_P3(4)_070.fcs		200000
>	macrophages	2.28	4567
>	tumor	92	184043
> >	single cell	97.8	179908
> > >	Live	64.1	115338
> > > >	CD45.2+	11.1	12848
> > > >	CD45.2+&CD3-	10.4	12000
> > > > >	CD11b+	90.6	10874
> > > > > >	Q1: Comp-APC-A- , Comp-PE-A+	46.6	5064
> > > > > > >	CD86+	83.7	4238
> > > > > > >	CD206+	36.8	1866
> > > > > >	Q2: Comp-APC-A+ , Comp-PE-A+	40.6	4418
> > > > > > >	CD86+	51.4	2270
> > > > > > >	CD206+	3.42	151
> > > > > >	Q3: Comp-APC-A+ , Comp-PE-A-	9.59	1043
> > > > > > >	CD86+	15.5	162
> > > > > > >	CD206+	0.58	6
> > > > > >	Q4: Comp-APC-A- , Comp-PE-A-	3.21	349
> > > > > > >	CD86+	39.5	138
> > > > > > >	CD206+	3.44	12
> > > > >	macrophages	39.9	4790
> > > > > >	Q1: Comp-BV421-A- , Comp-PE-Cy7-A+	38.8	1857
> > > > > >	Q2: Comp-BV421-A+ , Comp-PE-Cy7-A+	31	1486
> > > > > >	Q3: Comp-BV421-A+ , Comp-PE-Cy7-A-	7.97	382
> > > > > >	Q4: Comp-BV421-A- , Comp-PE-Cy7-A-	22.2	1065
> > > >	macrophages	3.8	4380

## Sheet: Figure 5_Data1
	Name	Statistic	#Cells
	8se_Day7(1)_010.fcs		200000
>	tumor	94.7	189419					Day7(1)	Day7(2)	Day7(3)	Day14(1)	Day14(2)	Day14(3)
> >	Single cell	91.2	172663			tumor	tumor	94.7	94.7	94.7	88.7	88.8	88.9
> > >	Live	78	134647			Single cell	Single cell	91.2	91.4	91.3	94.3	94.3	94.3
> > > >	CD45.2+	26.8	36071			Live	Live	78	78	78.8	24.8	24.2	23.9
> > > > >	CD11b+	95.1	34291			CD45.2	CD45.2	26.8	27.2	27.2	21.2	21	21
> > > > > >	Q1: Comp-APC-A- , Comp-PE-A+	44.3	15189			CD11b+	CD11b+	95.1	94.9	95.1	91.4	91.3	89.8
> > > > > >	Q2: Comp-APC-A+ , Comp-PE-A+	40.7	13947			Q1: Comp-APC-A- , Comp-PE-A+	F4/80+	44.3	43.7	43.6	53.1	53.7	54.8
> > > > > >	Q3: Comp-APC-A+ , Comp-PE-A-	8.88	3044			Q2: Comp-APC-A+ , Comp-PE-A+	F4/80+ and Ly6C+	40.7	40.8	40.7	41.4	41.3	40.2
> > > > > >	Q4: Comp-APC-A- , Comp-PE-A-	6.16	2111			Q3: Comp-APC-A+ , Comp-PE-A-	Ly6C+	8.88	9.1	9.27	2.7	2.34	2.32
	8se_Day7(2)_011.fcs		200000			Q4: Comp-APC-A- , Comp-PE-A-	F4/80- and Ly6C-	6.16	6.38	6.43	2.85	2.63	2.71
>	tumor	94.7	189466
> >	Single cell	91.4	173116
> > >	Live	78	134996
> > > >	CD45.2+	27.2	36657				macrophages	12.9	12.8	12.8	8.35	8.58	8.61
> > > > >	CD11b+	94.9	34782
> > > > > >	Q1: Comp-APC-A- , Comp-PE-A+	43.7	15193
> > > > > >	Q2: Comp-APC-A+ , Comp-PE-A+	40.8	14206
> > > > > >	Q3: Comp-APC-A+ , Comp-PE-A-	9.1	3165
> > > > > >	Q4: Comp-APC-A- , Comp-PE-A-	6.38	2218
	8se_Day7(3)_012.fcs		200000
>	tumor	94.7	189369
> >	Single cell	91.3	172811
> > >	Live	78.8	136109
> > > >	CD45.2+	27.2	36991
> > > > >	CD11b+	95.1	35161
> > > > > >	Q1: Comp-APC-A- , Comp-PE-A+	43.6	15328
> > > > > >	Q2: Comp-APC-A+ , Comp-PE-A+	40.7	14313
> > > > > >	Q3: Comp-APC-A+ , Comp-PE-A-	9.27	3260
> > > > > >	Q4: Comp-APC-A- , Comp-PE-A-	6.43	2260
	8se_Day14(1)_013.fcs		200000
>	tumor	88.7	177457
> >	Single cell	94.3	167271
> > >	Live	24.8	41405
> > > >	CD45.2+	21.2	8785
> > > > >	CD11b+	91.4	8027
> > > > > >	Q1: Comp-APC-A- , Comp-PE-A+	53.1	4261
> > > > > >	Q2: Comp-APC-A+ , Comp-PE-A+	41.4	3320
> > > > > >	Q3: Comp-APC-A+ , Comp-PE-A-	2.7	217
> > > > > >	Q4: Comp-APC-A- , Comp-PE-A-	2.85	229
	8se_Day14(2)_014.fcs		200000
>	tumor	88.8	177564
> >	Single cell	94.3	167403
> > >	Live	24.2	40560
> > > >	CD45.2+	21	8499
> > > > >	CD11b+	91.3	7763
> > > > > >	Q1: Comp-APC-A- , Comp-PE-A+	53.7	4170
> > > > > >	Q2: Comp-APC-A+ , Comp-PE-A+	41.3	3207
> > > > > >	Q3: Comp-APC-A+ , Comp-PE-A-	2.34	182
> > > > > >	Q4: Comp-APC-A- , Comp-PE-A-	2.63	204
	8se_Day14(3)_015.fcs		200000
>	tumor	88.9	177751
> >	Single cell	94.3	167616
> > >	Live	23.9	40123
> > > >	CD45.2+	21	8411
> > > > >	CD11b+	89.8	7555
> > > > > >	Q1: Comp-APC-A- , Comp-PE-A+	54.8	4137
> > > > > >	Q2: Comp-APC-A+ , Comp-PE-A+	40.2	3038
> > > > > >	Q3: Comp-APC-A+ , Comp-PE-A-	2.32	175
> > > > > >	Q4: Comp-APC-A- , Comp-PE-A-	2.71	205

## Sheet: Figure 5_Data2
	Name	Statistic	#Cells
	8se_BV421 control_023.fcs		200017
	8se_Day7(1)_011.fcs		200000
>	tumor	96.7	193307
> >	Single cell	95.8	185140					Day7(1)	Day7(2)	Day7(3)	Day7(4)	Day14(1)	Day14(2)	Day14(3)	Day14(4)
> > >	Live	88.1	163093				tumor	96.7	96.8	96.5	97.6	81	81.3	78.4	81.4
> > > >	CD45.2+	17	27696				Single cell	95.8	95.3	94.9	96.1	96.3	96.1	96.1	96.2
> > > > >	CD11b+	96.9	26827				Live	88.1	91.4	90.7	91.6	39.7	49.5	30.6	48.8
> > > > > >	Q1: Comp-APC-A- , Comp-PE-A+	51.8	13909				CD45.2+	17	18.5	18.1	14.7	10.6	11	9.91	10.2
> > > > > > >	CD11c+	95.7	13309				CD11b+	96.9	96.1	95.7	96.6	96.8	96.2	96	95.6
> > > > > > >	MHCⅡ+	66.4	9230			Q1: Comp-APC-A- , Comp-PE-A+	F4/80+	51.8	45.6	46.9	56.8	66.9	63	61.8	58.8
> > > > > >	Q2: Comp-APC-A+ , Comp-PE-A+	38.4	10299			CD11c+		95.7	92.1	91.5	95.5	98	97	97.7	97.8
> > > > > > >	CD11c+	77.8	8009			MHCⅡ+		66.4	68.3	69.9	67.4	77.5	78.8	80.2	78.9
> > > > > > >	MHCⅡ+	56.9	5858			Q2: Comp-APC-A+ , Comp-PE-A+	F4/80+ and Ly6C+	38.4	42.8	41.1	30.7	25.3	28.1	29.6	32.3
> > > > > >	Q3: Comp-APC-A+ , Comp-PE-A-	4.07	1093			CD11c+		77.8	72.2	73.4	71.3	85.2	85.5	80.1	87.5
> > > > > > >	CD11c+	32.8	358			MHCⅡ+		56.9	58.5	64.2	55.2	61.8	64.1	59	67.9
> > > > > > >	MHCⅡ+	30.7	336			Q3: Comp-APC-A+ , Comp-PE-A-	Ly6C+	4.07	4.91	4.9	5.49	3.33	3.91	4.44	4.08
> > > > > >	Q4: Comp-APC-A- , Comp-PE-A-	5.69	1526			CD11c+		32.8	34.9	33.5	23.4	32.5	32.8	37.4	42.2
> > > > > > >	CD11c+	69.7	1064			MHCⅡ+		30.7	37.3	35.6	23.8	24.5	27.2	23.1	34
> > > > > > >	MHCⅡ+	76.1	1162			Q4: Comp-APC-A- , Comp-PE-A-	F4/80- and Ly6C-	5.69	6.68	7.08	7.01	4.4	4.98	4.19	4.9
> > > > >	macrophages	69.9	19365			CD11c+		69.7	78.2	73.8	59.4	87.9	84.3	78.3	72
	8se_Day7(2)_012.fcs		200000			MHCⅡ+		76.1	84.4	79.5	67.3	77.5	73.7	70.7	66.5
>	tumor	96.8	193526			macrophages		69.9	64.8	64.6	67.5	77.4	74.9	72.1	72.9
> >	Single cell	95.3	184510
> > >	Live	91.4	168559
> > > >	CD45.2+	18.5	31187					Day7(1)	Day7(2)	Day7(3)	Day7(4)	Day14(1)	Day14(2)	Day14(3)	Day14(4)
> > > > >	CD11b+	96.1	29965				F4/80+	51.8	45.6	46.9	56.8	66.9	63	61.8	58.8
> > > > > >	Q1: Comp-APC-A- , Comp-PE-A+	45.6	13674				F4/80+ and Ly6C+	38.4	42.8	41.1	30.7	25.3	28.1	29.6	32.3
> > > > > > >	CD11c+	92.1	12590				Ly6C+	4.07	4.91	4.9	5.49	3.33	3.91	4.44	4.08
> > > > > > >	MHCⅡ+	68.3	9335				F4/80- and Ly6C-	5.69	6.68	7.08	7.01	4.4	4.98	4.19	4.9
> > > > > >	Q2: Comp-APC-A+ , Comp-PE-A+	42.8	12818
> > > > > > >	CD11c+	72.2	9249
> > > > > > >	MHCⅡ+	58.5	7493
> > > > > >	Q3: Comp-APC-A+ , Comp-PE-A-	4.91	1471			CD11c+		Day7(1)	Day7(2)	Day7(3)	Day7(4)	Day14(1)	Day14(2)	Day14(3)	Day14(4)
> > > > > > >	CD11c+	34.9	514				F4/80+	95.7	92.1	91.5	95.5	98	97	97.7	97.8
> > > > > > >	MHCⅡ+	37.3	548				F4/80+ and Ly6C+	77.8	72.2	73.4	71.3	85.2	85.5	80.1	87.5
> > > > > >	Q4: Comp-APC-A- , Comp-PE-A-	6.68	2002				Ly6C+	32.8	34.9	33.5	23.4	32.5	32.8	37.4	42.2
> > > > > > >	CD11c+	78.2	1566				F4/80- and Ly6C-	69.7	78.2	73.8	59.4	87.9	84.3	78.3	72
> > > > > > >	MHCⅡ+	84.4	1689
> > > > >	macrophages	64.8	20200
	8se_Day7(3)_013.fcs		200000
>	tumor	96.5	192938
> >	Single cell	94.9	183131			MHCⅡ+		Day7(1)	Day7(2)	Day7(3)	Day7(4)	Day14(1)	Day14(2)	Day14(3)	Day14(4)
> > >	Live	90.7	166191				F4/80+	66.4	68.3	69.9	67.4	77.5	78.8	80.2	78.9
> > > >	CD45.2+	18.1	30151				F4/80+ and Ly6C+	56.9	58.5	64.2	55.2	61.8	64.1	59	67.9
> > > > >	CD11b+	95.7	28857				Ly6C+	30.7	37.3	35.6	23.8	24.5	27.2	23.1	34
> > > > > >	Q1: Comp-APC-A- , Comp-PE-A+	46.9	13536				F4/80- and Ly6C-	76.1	84.4	79.5	67.3	77.5	73.7	70.7	66.5
> > > > > > >	CD11c+	91.5	12381
> > > > > > >	MHCⅡ+	69.9	9466
> > > > > >	Q2: Comp-APC-A+ , Comp-PE-A+	41.1	11864				Data2	Day7(1)	Day7(2)	Day7(3)	Day7(4)	Day14(1)	Day14(2)	Day14(3)	Day14(4)
> > > > > > >	CD11c+	73.4	8707				macrophages	10.3	9.95	9.71	9.71	7.26	7.21	6.3	6.53
> > > > > > >	MHCⅡ+	64.2	7618
> > > > > >	Q3: Comp-APC-A+ , Comp-PE-A-	4.9	1414
> > > > > > >	CD11c+	33.5	474
> > > > > > >	MHCⅡ+	35.6	503				Data1+Data2	7							14
> > > > > >	Q4: Comp-APC-A- , Comp-PE-A-	7.08	2043				macrophages	12.9	12.8	12.8	10.3	9.95	9.71	9.71	8.35	8.58	8.61	7.26	7.21	6.3	6.53	7.1	7.03	6.77	3.62	4.44	4.37	4.05
> > > > > > >	CD11c+	73.8	1508
> > > > > > >	MHCⅡ+	79.5	1625
> > > > >	macrophages	64.6	19473
	8se_Day7(4)_014.fcs		200000
>	tumor	97.6	195237
> >	Single cell	96.1	187587
> > >	Live	91.6	171803
> > > >	CD45.2+	14.7	25221
> > > > >	CD11b+	96.6	24370
> > > > > >	Q1: Comp-APC-A- , Comp-PE-A+	56.8	13838
> > > > > > >	CD11c+	95.5	13220
> > > > > > >	MHCⅡ+	67.4	9331
> > > > > >	Q2: Comp-APC-A+ , Comp-PE-A+	30.7	7485				整合	7							14
> > > > > > >	CD11c+	71.3	5340				CD45.2+	26.8	27.2	27.2	17	18.5	18.1	14.7	21.2	21	21	10.6	11	9.91	10.2
> > > > > > >	MHCⅡ+	55.2	4130					26.8							21.2
> > > > > >	Q3: Comp-APC-A+ , Comp-PE-A-	5.49	1338					27.2							21
> > > > > > >	CD11c+	23.4	313					27.2							21
> > > > > > >	MHCⅡ+	23.8	318					17							10.6
> > > > > >	Q4: Comp-APC-A- , Comp-PE-A-	7.01	1709					18.5							11
> > > > > > >	CD11c+	59.4	1016					18.1							9.91
> > > > > > >	MHCⅡ+	67.3	1150					14.7							10.2
> > > > >	macrophages	67.5	17028
	8se_Day14(1)_015.fcs		200000				12.9	12.8	12.8	8.35	8.58	8.61	7.1	7.03	6.77
>	tumor	81	162062
> >	Single cell	96.3	156134
> > >	Live	39.7	61987
> > > >	CD45.2+	10.6	6570
> > > > >	CD11b+	96.8	6363
> > > > > >	Q1: Comp-APC-A- , Comp-PE-A+	66.9	4260
> > > > > > >	CD11c+	98	4176
> > > > > > >	MHCⅡ+	77.5	3300
> > > > > >	Q2: Comp-APC-A+ , Comp-PE-A+	25.3	1611
> > > > > > >	CD11c+	85.2	1373
> > > > > > >	MHCⅡ+	61.8	996
> > > > > >	Q3: Comp-APC-A+ , Comp-PE-A-	3.33	212
> > > > > > >	CD11c+	32.5	69
> > > > > > >	MHCⅡ+	24.5	52
> > > > > >	Q4: Comp-APC-A- , Comp-PE-A-	4.4	280
> > > > > > >	CD11c+	87.9	246
> > > > > > >	MHCⅡ+	77.5	217
> > > > >	macrophages	77.4	5088
	8se_Day14(2)_016.fcs		200060
>	tumor	81.3	162625
> >	Single cell	96.1	156343
> > >	Live	49.5	77386
> > > >	CD45.2+	11	8506
> > > > >	CD11b+	96.2	8179
> > > > > >	Q1: Comp-APC-A- , Comp-PE-A+	63	5153
> > > > > > >	CD11c+	97	4997
> > > > > > >	MHCⅡ+	78.8	4058
> > > > > >	Q2: Comp-APC-A+ , Comp-PE-A+	28.1	2299
> > > > > > >	CD11c+	85.5	1965
> > > > > > >	MHCⅡ+	64.1	1474
> > > > > >	Q3: Comp-APC-A+ , Comp-PE-A-	3.91	320
> > > > > > >	CD11c+	32.8	105
> > > > > > >	MHCⅡ+	27.2	87
> > > > > >	Q4: Comp-APC-A- , Comp-PE-A-	4.98	407
> > > > > > >	CD11c+	84.3	343
> > > > > > >	MHCⅡ+	73.7	300
> > > > >	macrophages	74.9	6368
	8se_Day14(3)_017.fcs		200000
>	tumor	78.4	156806
> >	Single cell	96.1	150714
> > >	Live	30.6	46161
> > > >	CD45.2+	9.91	4573
> > > > >	CD11b+	96	4389
> > > > > >	Q1: Comp-APC-A- , Comp-PE-A+	61.8	2711
> > > > > > >	CD11c+	97.7	2650
> > > > > > >	MHCⅡ+	80.2	2173
> > > > > >	Q2: Comp-APC-A+ , Comp-PE-A+	29.6	1299
> > > > > > >	CD11c+	80.1	1041
> > > > > > >	MHCⅡ+	59	767
> > > > > >	Q3: Comp-APC-A+ , Comp-PE-A-	4.44	195
> > > > > > >	CD11c+	37.4	73
> > > > > > >	MHCⅡ+	23.1	45
> > > > > >	Q4: Comp-APC-A- , Comp-PE-A-	4.19	184
> > > > > > >	CD11c+	78.3	144
> > > > > > >	MHCⅡ+	70.7	130
> > > > >	macrophages	72.1	3298
	8se_Day14(4)_018.fcs		200000
>	tumor	81.4	162770
> >	Single cell	96.2	156564
> > >	Live	48.8	76452
> > > >	CD45.2+	10.2	7768
> > > > >	CD11b+	95.6	7429
> > > > > >	Q1: Comp-APC-A- , Comp-PE-A+	58.8	4366
> > > > > > >	CD11c+	97.8	4272
> > > > > > >	MHCⅡ+	78.9	3444
> > > > > >	Q2: Comp-APC-A+ , Comp-PE-A+	32.3	2396
> > > > > > >	CD11c+	87.5	2096
> > > > > > >	MHCⅡ+	67.9	1628
> > > > > >	Q3: Comp-APC-A+ , Comp-PE-A-	4.08	303
> > > > > > >	CD11c+	42.2	128
> > > > > > >	MHCⅡ+	34	103
> > > > > >	Q4: Comp-APC-A- , Comp-PE-A-	4.9	364
> > > > > > >	CD11c+	72	262
> > > > > > >	MHCⅡ+	66.5	242
> > > > >	macrophages	72.9	5666

## Sheet: Figure S1_1
	Name	Statistic	#Cells
	8se_BV421 control_032.fcs		200000
	8se_F(1)_023.fcs		200000				PBS(1)	PBS(2)	PBS(3)	PBS(4)	PBS+C(1)	PBS+C(2)	PBS+C(3)	PBS+C(4)	P3(1)	P3(2)	P3(3)	P3(4)	F(1)	F(2)	F(3)	F(4)	F+C(1)	F+C(2)	F+C(3)	F+C(4)
>	tumor	91.8	183588			tumor	86.5	88	87.4	87.7	91.2	89	91.7	87.8	88.7	84.7	86.7	96.1	91.8	96.3	97.2	96.6	95.8	97.8	97.7	97.5
> >	单细胞	94.1	172802			单细胞	93.2	92	93.3	93.2	93.3	94.1	95.1	94.6	94.7	93.7	94.3	95.1	94.1	92.9	92.4	92.5	86.2	93.4	94.5	94.1
> > >	Live	73.6	127162			Live	25.6	38.2	24.7	24.9	53.2	48.1	57	33.2	57.2	59.7	33.8	80.5	73.6	84.4	88.2	84.6	80.5	91.4	80	89.2
> > > >	CD45.2+	48.1	61124			CD45.2+	11.5	5.25	13	13.7	7.8	7.23	9.28	8.3	22.2	18.2	17.1	14.3	48.1	38.2	39.3	29.3	27.2	25.6	13.9	21.2
> > > >	CD45.2+&CD3-	44.5	56593			CD45.2+&CD3-	10.9	4.95	12.3	13	7.33	6.86	8.7	7.66	20.1	16.7	15.9	13.7	44.5	35.3	36.4	25.7	23.1	23.6	12.9	19.7
> > > > >	CD11b+	79.7	45081			CD11b+	96.5	96.3	96.2	95.4	95.9	95.9	95.9	96.7	88.7	96.7	93.2	92.2	79.7	81.4	85.7	81.3	69.7	86	82.5	89.8
> > > > > >	Q1: Comp-APC-A- , Comp-PE-A+	53.8	24261		Q1: Comp-APC-A- , Comp-PE-A+	F4/80+	59.8	59.9	59.4	64.5	42.3	64.8	53.6	53	38.3	30	52.4	63.1	53.8	41.5	49.8	38.5	49.6	53.2	58	51.1
> > > > > > >	CD86+	55.4	13438		CD86+		94.1	96.7	91.2	95	93.3	98	96.6	97.4	85	73.7	88.2	95.6	55.4	71.7	70.8	95.6	89.8	87.9	91.1	80.8
> > > > > > >	MHCⅡ+	91.7	22239		MHCⅡ+		36.6	44.6	51.4	58	50.7	68.9	60.1	67.3	79	66.1	63.5	87.7	91.7	92.9	85.7	78.7	95	95.4	92.7	91.7
> > > > > >	Q2: Comp-APC-A+ , Comp-PE-A+	40.2	18124		Q2: Comp-APC-A+ , Comp-PE-A+	F4/80+ and Ly6C+	26.7	19.3	24.7	23.9	40.5	24.5	35.4	31.4	51.5	32.4	34.6	28.7	40.2	47.3	42.6	53.2	40.2	41.6	35.3	43.6
> > > > > > >	CD86+	67.5	12234		CD86+		64.6	69	57.9	72.5	58.5	66.1	62.5	66.1	61.1	51.5	57.9	67.4	67.5	65.8	70.1	52	74	70.5	70.3	72.6
> > > > > > >	MHCⅡ+	64.9	11756		MHCⅡ+		20.6	19.7	28.1	36.9	20.6	29.1	26.9	28.3	42.7	34.7	36	44.7	64.9	68.7	61.7	55.1	71	67.6	51.7	67.6
> > > > > >	Q3: Comp-APC-A+ , Comp-PE-A-	3.85	1736		Q3: Comp-APC-A+ , Comp-PE-A-	Ly6C+	8.69	14.4	9.1	6.17	14	6.94	8.07	9.73	7.57	21.3	8.42	5.98	3.85	6.58	4.48	4.07	7.23	3.68	4.81	3.84
> > > > > > >	CD86+	24.3	422		CD86+		14	13.2	13.9	24.1	10.8	14.7	14.6	17.6	27.6	33.6	22.6	18	24.3	34.9	45.3	15	20.7	32.2	26.1	27.6
> > > > > > >	MHCⅡ+	27.5	478		MHCⅡ+		9.76	8.24	13.6	20.9	5.7	8.97	8.37	10.1	21.5	21.7	19	11.1	27.5	40.1	44.4	16	25.3	34.2	24.9	34.7
> > > > > >	Q4: Comp-APC-A- , Comp-PE-A-	2.13	960		Q4: Comp-APC-A- , Comp-PE-A-	F4/80- and Ly6C-	4.84	6.38	6.85	5.48	3.11	3.74	2.93	5.83	2.55	16.2	4.67	2.3	2.13	4.54	3.09	4.28	2.96	1.53	1.84	1.42
> > > > > > >	CD86+	20.1	193		CD86+		55	53.7	55.2	61.2	53	63.6	52.3	61.3	51.5	65.1	48.3	58.5	20.1	21.3	34.6	27.4	41.5	43.9	59.9	43.3
> > > > > > >	MHCⅡ+	28.6	275		MHCⅡ+		58.8	59	76.4	69.9	52.5	70.2	56.8	51.7	51	42.1	59.8	63.6	28.6	28.4	43.6	10.2	65.8	54.7	73.4	62.5
> > > > >	macrophages	52.3	29581		macrophages	macrophages	60.7	55.9	55.1	61.1	47.9	64	58.4	50.9	42.4	17	49	64	52.3	39.6	49	47.5	43.5	55.8	55	57.2
> > > >	CD45.2+&F4\80+	22.4	28512		CD45.2+&F4\80+	CD45.2+&F4\80+	6.31	2.65	6.32	7.48	3.36	4.24	4.87	3.71	8	2.23	7.25	8.45	22.4	13.2	16.9	11.9	9.63	12.7	6.76	10.7
	8se_F(2)_024.fcs		200000
>	tumor	96.3	192681				PBS(1)	PBS(2)	PBS(3)	PBS(4)	PBS+C(1)	PBS+C(2)	PBS+C(3)	PBS+C(4)	P3(1)	P3(2)	P3(3)	P3(4)	F(1)	F(2)	F(3)	F(4)	F+C(1)	F+C(2)	F+C(3)	F+C(4)
> >	单细胞	92.9	179052			F4/80+	59.8	59.9	59.4	64.5	42.3	64.8	53.6	53	38.3	30	52.4	63.1	53.8	41.5	49.8	38.5	49.6	53.2	58	51.1
> > >	Live	84.4	151051			F4/80+ and Ly6C+	26.7	19.3	24.7	23.9	40.5	24.5	35.4	31.4	51.5	32.4	34.6	28.7	40.2	47.3	42.6	53.2	40.2	41.6	35.3	43.6
> > > >	CD45.2+	38.2	57630			Ly6C+	8.69	14.4	9.1	6.17	14	6.94	8.07	9.73	7.57	21.3	8.42	5.98	3.85	6.58	4.48	4.07	7.23	3.68	4.81	3.84
> > > >	CD45.2+&CD3-	35.3	53309			F4/80- and Ly6C-	4.84	6.38	6.85	5.48	3.11	3.74	2.93	5.83	2.55	16.2	4.67	2.3	2.13	4.54	3.09	4.28	2.96	1.53	1.84	1.42
> > > > >	CD11b+	81.4	43416
> > > > > >	Q1: Comp-APC-A- , Comp-PE-A+	41.5	18036
> > > > > > >	CD86+	71.7	12935
> > > > > > >	MHCⅡ+	92.9	16750		CD86+		PBS(1)	PBS(2)	PBS(3)	PBS(4)	PBS+C(1)	PBS+C(2)	PBS+C(3)	PBS+C(4)	P3(1)	P3(2)	P3(3)	P3(4)	F(1)	F(2)	F(3)	F(4)	F+C(1)	F+C(2)	F+C(3)	F+C(4)
> > > > > >	Q2: Comp-APC-A+ , Comp-PE-A+	47.3	20552			F4/80+	94.1	96.7	91.2	95	93.3	98	96.6	97.4	85	73.7	88.2	95.6	55.4	71.7	70.8	95.6	89.8	87.9	91.1	80.8
> > > > > > >	CD86+	65.8	13522			F4/80+ and Ly6C+	64.6	69	57.9	72.5	58.5	66.1	62.5	66.1	61.1	51.5	57.9	67.4	67.5	65.8	70.1	52	74	70.5	70.3	72.6
> > > > > > >	MHCⅡ+	68.7	14122			Ly6C+	14	13.2	13.9	24.1	10.8	14.7	14.6	17.6	27.6	33.6	22.6	18	24.3	34.9	45.3	15	20.7	32.2	26.1	27.6
> > > > > >	Q3: Comp-APC-A+ , Comp-PE-A-	6.58	2857			F4/80- and Ly6C-	55	53.7	55.2	61.2	53	63.6	52.3	61.3	51.5	65.1	48.3	58.5	20.1	21.3	34.6	27.4	41.5	43.9	59.9	43.3
> > > > > > >	CD86+	34.9	997
> > > > > > >	MHCⅡ+	40.1	1145
> > > > > >	Q4: Comp-APC-A- , Comp-PE-A-	4.54	1971
> > > > > > >	CD86+	21.3	420		MHCⅡ+		PBS(1)	PBS(2)	PBS(3)	PBS(4)	PBS+C(1)	PBS+C(2)	PBS+C(3)	PBS+C(4)	P3(1)	P3(2)	P3(3)	P3(4)	F(1)	F(2)	F(3)	F(4)	F+C(1)	F+C(2)	F+C(3)	F+C(4)
> > > > > > >	MHCⅡ+	28.4	559			F4/80+	36.6	44.6	51.4	58	50.7	68.9	60.1	67.3	79	66.1	63.5	87.7	91.7	92.9	85.7	78.7	95	95.4	92.7	91.7
> > > > >	macrophages	39.6	21115			F4/80+ and Ly6C+	20.6	19.7	28.1	36.9	20.6	29.1	26.9	28.3	42.7	34.7	36	44.7	64.9	68.7	61.7	55.1	71	67.6	51.7	67.6
> > > >	CD45.2+&F4\80+	13.2	19980			Ly6C+	9.76	8.24	13.6	20.9	5.7	8.97	8.37	10.1	21.5	21.7	19	11.1	27.5	40.1	44.4	16	25.3	34.2	24.9	34.7
	8se_F(3)_025.fcs		200000			F4/80- and Ly6C-	58.8	59	76.4	69.9	52.5	70.2	56.8	51.7	51	42.1	59.8	63.6	28.6	28.4	43.6	10.2	65.8	54.7	73.4	62.5
>	tumor	97.2	194473
> >	单细胞	92.4	179766				PBS(1)	PBS(2)	PBS(3)	PBS(4)	PBS+C(1)	PBS+C(2)	PBS+C(3)	PBS+C(4)	P3(1)	P3(2)	P3(3)	P3(4)	F(1)	F(2)	F(3)	F(4)	F+C(1)	F+C(2)	F+C(3)	F+C(4)
> > >	Live	88.2	158629			CD45.2	11.5	5.25	13	13.7	7.8	7.23	9.28	8.3	22.2	18.2	17.1	14.3	48.1	38.2	39.3	29.3	27.2	25.6	13.9	21.2
> > > >	CD45.2+	39.3	62296		live以下	macrophages	6.45	2.71	6.51	7.67	3.42	4.31	4.95	3.8	8.24	2.44	7.47	8.57	22.8	13.5	17.3	12.3	9.75	12.9	6.83	10.9	手动输入
> > > >	CD45.2+&CD3-	36.4	57701			CD45.2+&F4\80+	6.31	2.65	6.32	7.48	3.36	4.24	4.87	3.71	8	2.23	7.25	8.45	22.4	13.2	16.9	3.19	9.63	12.7	6.76	10.7
> > > > >	CD11b+	85.7	49423
> > > > > >	Q1: Comp-APC-A- , Comp-PE-A+	49.8	24622
> > > > > > >	CD86+	70.8	17440
> > > > > > >	MHCⅡ+	85.7	21103
> > > > > >	Q2: Comp-APC-A+ , Comp-PE-A+	42.6	21061
> > > > > > >	CD86+	70.1	14770
> > > > > > >	MHCⅡ+	61.7	13005
> > > > > >	Q3: Comp-APC-A+ , Comp-PE-A-	4.48	2212
> > > > > > >	CD86+	45.3	1003
> > > > > > >	MHCⅡ+	44.4	982
> > > > > >	Q4: Comp-APC-A- , Comp-PE-A-	3.09	1528
> > > > > > >	CD86+	34.6	528
> > > > > > >	MHCⅡ+	43.6	666
> > > > >	macrophages	49	28248
> > > >	CD45.2+&F4\80+	16.9	26765
	8se_F(4)_026.fcs		200000
>	tumor	96.6	193179
> >	单细胞	92.5	178625
> > >	Live	84.6	151034
> > > >	CD45.2+	29.3	44272
> > > >	CD45.2+&CD3-	25.7	38771
> > > > >	CD11b+	81.3	31509
> > > > > >	Q1: Comp-APC-A- , Comp-PE-A+	38.5	12129
> > > > > > >	CD86+	95.6	11590
> > > > > > >	MHCⅡ+	78.7	9541
> > > > > >	Q2: Comp-APC-A+ , Comp-PE-A+	53.2	16748
> > > > > > >	CD86+	52	8717
> > > > > > >	MHCⅡ+	55.1	9229
> > > > > >	Q3: Comp-APC-A+ , Comp-PE-A-	4.07	1283
> > > > > > >	CD86+	15	193
> > > > > > >	MHCⅡ+	16	205
> > > > > >	Q4: Comp-APC-A- , Comp-PE-A-	4.28	1349
> > > > > > >	CD86+	27.4	370
> > > > > > >	MHCⅡ+	10.2	137
> > > > >	macrophages	47.5	18424
> > > >	CD45.2+&F4\80+	11.9	18033
	8se_F+C(1)_027.fcs		200000
>	tumor	95.8	191633
> >	单细胞	86.2	165173
> > >	Live	80.5	132934
> > > >	CD45.2+	27.2	36196
> > > >	CD45.2+&CD3-	23.1	30730
> > > > >	CD11b+	69.7	21410
> > > > > >	Q1: Comp-APC-A- , Comp-PE-A+	49.6	10615
> > > > > > >	CD86+	89.8	9532
> > > > > > >	MHCⅡ+	95	10080
> > > > > >	Q2: Comp-APC-A+ , Comp-PE-A+	40.2	8614
> > > > > > >	CD86+	74	6378
> > > > > > >	MHCⅡ+	71	6120
> > > > > >	Q3: Comp-APC-A+ , Comp-PE-A-	7.23	1547
> > > > > > >	CD86+	20.7	321
> > > > > > >	MHCⅡ+	25.3	392
> > > > > >	Q4: Comp-APC-A- , Comp-PE-A-	2.96	634
> > > > > > >	CD86+	41.5	263
> > > > > > >	MHCⅡ+	65.8	417
> > > > >	macrophages	43.5	13377
> > > >	CD45.2+&F4\80+	9.63	12807
	8se_F+C(2)_028.fcs		200000
>	tumor	97.8	195689
> >	单细胞	93.4	182836
> > >	Live	91.4	167049
> > > >	CD45.2+	25.6	42741
> > > >	CD45.2+&CD3-	23.6	39411
> > > > >	CD11b+	86	33911
> > > > > >	Q1: Comp-APC-A- , Comp-PE-A+	53.2	18033
> > > > > > >	CD86+	87.9	15856
> > > > > > >	MHCⅡ+	95.4	17205
> > > > > >	Q2: Comp-APC-A+ , Comp-PE-A+	41.6	14112
> > > > > > >	CD86+	70.5	9947
> > > > > > >	MHCⅡ+	67.6	9535
> > > > > >	Q3: Comp-APC-A+ , Comp-PE-A-	3.68	1247
> > > > > > >	CD86+	32.2	402
> > > > > > >	MHCⅡ+	34.2	426
> > > > > >	Q4: Comp-APC-A- , Comp-PE-A-	1.53	519
> > > > > > >	CD86+	43.9	228
> > > > > > >	MHCⅡ+	54.7	284
> > > > >	macrophages	55.8	21999
> > > >	CD45.2+&F4\80+	12.7	21284
	8se_F+C(3)_029.fcs		200000
>	tumor	97.7	195401
> >	单细胞	94.5	184739
> > >	Live	80	147719
> > > >	CD45.2+	13.9	20464
> > > >	CD45.2+&CD3-	12.9	19011
> > > > >	CD11b+	82.5	15691
> > > > > >	Q1: Comp-APC-A- , Comp-PE-A+	58	9107
> > > > > > >	CD86+	91.1	8301
> > > > > > >	MHCⅡ+	92.7	8439
> > > > > >	Q2: Comp-APC-A+ , Comp-PE-A+	35.3	5540
> > > > > > >	CD86+	70.3	3892
> > > > > > >	MHCⅡ+	51.7	2865
> > > > > >	Q3: Comp-APC-A+ , Comp-PE-A-	4.81	755
> > > > > > >	CD86+	26.1	197
> > > > > > >	MHCⅡ+	24.9	188
> > > > > >	Q4: Comp-APC-A- , Comp-PE-A-	1.84	289
> > > > > > >	CD86+	59.9	173
> > > > > > >	MHCⅡ+	73.4	212
> > > > >	macrophages	55	10451
> > > >	CD45.2+&F4\80+	6.76	9989
	8se_F+C(4)_030.fcs		200000
>	tumor	97.5	195049
> >	单细胞	94.1	183636
> > >	Live	89.2	163745
> > > >	CD45.2+	21.2	34725
> > > >	CD45.2+&CD3-	19.7	32326
> > > > >	CD11b+	89.8	29039
> > > > > >	Q1: Comp-APC-A- , Comp-PE-A+	51.1	14841
> > > > > > >	CD86+	80.8	11991
> > > > > > >	MHCⅡ+	91.7	13603
> > > > > >	Q2: Comp-APC-A+ , Comp-PE-A+	43.6	12670
> > > > > > >	CD86+	72.6	9197
> > > > > > >	MHCⅡ+	67.6	8564
> > > > > >	Q3: Comp-APC-A+ , Comp-PE-A-	3.84	1115
> > > > > > >	CD86+	27.6	308
> > > > > > >	MHCⅡ+	34.7	387
> > > > > >	Q4: Comp-APC-A- , Comp-PE-A-	1.42	413
> > > > > > >	CD86+	43.3	179
> > > > > > >	MHCⅡ+	62.5	258
> > > > >	macrophages	57.2	18475
> > > >	CD45.2+&F4\80+	10.7	17579
	8se_PBS(1)_011.fcs		200000
>	tumor	86.5	173080
> >	单细胞	93.2	161246
> > >	Live	25.6	41321
> > > >	CD45.2+	11.5	4737
> > > >	CD45.2+&CD3-	10.9	4522
> > > > >	CD11b+	96.5	4363
> > > > > >	Q1: Comp-APC-A- , Comp-PE-A+	59.8	2607
> > > > > > >	CD86+	94.1	2454
> > > > > > >	MHCⅡ+	36.6	955
> > > > > >	Q2: Comp-APC-A+ , Comp-PE-A+	26.7	1166
> > > > > > >	CD86+	64.6	753
> > > > > > >	MHCⅡ+	20.6	240
> > > > > >	Q3: Comp-APC-A+ , Comp-PE-A-	8.69	379
> > > > > > >	CD86+	14	53
> > > > > > >	MHCⅡ+	9.76	37
> > > > > >	Q4: Comp-APC-A- , Comp-PE-A-	4.84	211
> > > > > > >	CD86+	55	116
> > > > > > >	MHCⅡ+	58.8	124
> > > > >	macrophages	60.7	2743
> > > >	CD45.2+&F4\80+	6.31	2608
	8se_PBS(2)_012.fcs		200000
>	tumor	88	175950
> >	单细胞	92	161838
> > >	Live	38.2	61841
> > > >	CD45.2+	5.25	3249
> > > >	CD45.2+&CD3-	4.95	3060
> > > > >	CD11b+	96.3	2947
> > > > > >	Q1: Comp-APC-A- , Comp-PE-A+	59.9	1766
> > > > > > >	CD86+	96.7	1707
> > > > > > >	MHCⅡ+	44.6	788
> > > > > >	Q2: Comp-APC-A+ , Comp-PE-A+	19.3	568
> > > > > > >	CD86+	69	392
> > > > > > >	MHCⅡ+	19.7	112
> > > > > >	Q3: Comp-APC-A+ , Comp-PE-A-	14.4	425
> > > > > > >	CD86+	13.2	56
> > > > > > >	MHCⅡ+	8.24	35
> > > > > >	Q4: Comp-APC-A- , Comp-PE-A-	6.38	188
> > > > > > >	CD86+	53.7	101
> > > > > > >	MHCⅡ+	59	111
> > > > >	macrophages	55.9	1711
> > > >	CD45.2+&F4\80+	2.65	1636
	8se_PBS(3)_013.fcs		200000
>	tumor	87.4	174711
> >	单细胞	93.3	163024
> > >	Live	24.7	40256
> > > >	CD45.2+	13	5243
> > > >	CD45.2+&CD3-	12.3	4943
> > > > >	CD11b+	96.2	4756
> > > > > >	Q1: Comp-APC-A- , Comp-PE-A+	59.4	2823
> > > > > > >	CD86+	91.2	2575
> > > > > > >	MHCⅡ+	51.4	1451
> > > > > >	Q2: Comp-APC-A+ , Comp-PE-A+	24.7	1174
> > > > > > >	CD86+	57.9	680
> > > > > > >	MHCⅡ+	28.1	330
> > > > > >	Q3: Comp-APC-A+ , Comp-PE-A-	9.1	433
> > > > > > >	CD86+	13.9	60
> > > > > > >	MHCⅡ+	13.6	59
> > > > > >	Q4: Comp-APC-A- , Comp-PE-A-	6.85	326
> > > > > > >	CD86+	55.2	180
> > > > > > >	MHCⅡ+	76.4	249
> > > > >	macrophages	55.1	2725
> > > >	CD45.2+&F4\80+	6.32	2545
	8se_PBS(4)_014.fcs		200000
>	tumor	87.7	175451
> >	单细胞	93.2	163582
> > >	Live	24.9	40663
> > > >	CD45.2+	13.7	5567
> > > >	CD45.2+&CD3-	13	5284
> > > > >	CD11b+	95.4	5040
> > > > > >	Q1: Comp-APC-A- , Comp-PE-A+	64.5	3249
> > > > > > >	CD86+	95	3086
> > > > > > >	MHCⅡ+	58	1885
> > > > > >	Q2: Comp-APC-A+ , Comp-PE-A+	23.9	1204
> > > > > > >	CD86+	72.5	873
> > > > > > >	MHCⅡ+	36.9	444
> > > > > >	Q3: Comp-APC-A+ , Comp-PE-A-	6.17	311
> > > > > > >	CD86+	24.1	75
> > > > > > >	MHCⅡ+	20.9	65
> > > > > >	Q4: Comp-APC-A- , Comp-PE-A-	5.48	276
> > > > > > >	CD86+	61.2	169
> > > > > > >	MHCⅡ+	69.9	193
> > > > >	macrophages	61.1	3229
> > > >	CD45.2+&F4\80+	7.48	3041
	8se_PBS+C(1)_015.fcs		200000
>	tumor	91.2	182376
> >	单细胞	93.3	170222
> > >	Live	53.2	90634
> > > >	CD45.2+	7.8	7065
> > > >	CD45.2+&CD3-	7.33	6643
> > > > >	CD11b+	95.9	6371
> > > > > >	Q1: Comp-APC-A- , Comp-PE-A+	42.3	2696
> > > > > > >	CD86+	93.3	2515
> > > > > > >	MHCⅡ+	50.7	1366
> > > > > >	Q2: Comp-APC-A+ , Comp-PE-A+	40.5	2582
> > > > > > >	CD86+	58.5	1511
> > > > > > >	MHCⅡ+	20.6	532
> > > > > >	Q3: Comp-APC-A+ , Comp-PE-A-	14	895
> > > > > > >	CD86+	10.8	97
> > > > > > >	MHCⅡ+	5.7	51
> > > > > >	Q4: Comp-APC-A- , Comp-PE-A-	3.11	198
> > > > > > >	CD86+	53	105
> > > > > > >	MHCⅡ+	52.5	104
> > > > >	macrophages	47.9	3181
> > > >	CD45.2+&F4\80+	3.36	3043
	8se_PBS+C(2)_016.fcs		200000
>	tumor	89	177939
> >	单细胞	94.1	167468
> > >	Live	48.1	80548
> > > >	CD45.2+	7.23	5822
> > > >	CD45.2+&CD3-	6.86	5527
> > > > >	CD11b+	95.9	5299
> > > > > >	Q1: Comp-APC-A- , Comp-PE-A+	64.8	3433
> > > > > > >	CD86+	98	3363
> > > > > > >	MHCⅡ+	68.9	2365
> > > > > >	Q2: Comp-APC-A+ , Comp-PE-A+	24.5	1300
> > > > > > >	CD86+	66.1	859
> > > > > > >	MHCⅡ+	29.1	378
> > > > > >	Q3: Comp-APC-A+ , Comp-PE-A-	6.94	368
> > > > > > >	CD86+	14.7	54
> > > > > > >	MHCⅡ+	8.97	33
> > > > > >	Q4: Comp-APC-A- , Comp-PE-A-	3.74	198
> > > > > > >	CD86+	63.6	126
> > > > > > >	MHCⅡ+	70.2	139
> > > > >	macrophages	64	3540
> > > >	CD45.2+&F4\80+	4.24	3415
	8se_PBS+C(3)_017.fcs		200000
>	tumor	91.7	183306
> >	单细胞	95.1	174235
> > >	Live	57	99283
> > > >	CD45.2+	9.28	9212
> > > >	CD45.2+&CD3-	8.7	8639
> > > > >	CD11b+	95.9	8287
> > > > > >	Q1: Comp-APC-A- , Comp-PE-A+	53.6	4439
> > > > > > >	CD86+	96.6	4290
> > > > > > >	MHCⅡ+	60.1	2670
> > > > > >	Q2: Comp-APC-A+ , Comp-PE-A+	35.4	2936
> > > > > > >	CD86+	62.5	1834
> > > > > > >	MHCⅡ+	26.9	789
> > > > > >	Q3: Comp-APC-A+ , Comp-PE-A-	8.07	669
> > > > > > >	CD86+	14.6	98
> > > > > > >	MHCⅡ+	8.37	56
> > > > > >	Q4: Comp-APC-A- , Comp-PE-A-	2.93	243
> > > > > > >	CD86+	52.3	127
> > > > > > >	MHCⅡ+	56.8	138
> > > > >	macrophages	58.4	5048
> > > >	CD45.2+&F4\80+	4.87	4837
	8se_PBS+C(4)_018.fcs		200000
>	tumor	87.8	175618
> >	单细胞	94.6	166157
> > >	Live	33.2	55095
> > > >	CD45.2+	8.3	4574
> > > >	CD45.2+&CD3-	7.66	4219
> > > > >	CD11b+	96.7	4081
> > > > > >	Q1: Comp-APC-A- , Comp-PE-A+	53	2163
> > > > > > >	CD86+	97.4	2107
> > > > > > >	MHCⅡ+	67.3	1455
> > > > > >	Q2: Comp-APC-A+ , Comp-PE-A+	31.4	1283
> > > > > > >	CD86+	66.1	848
> > > > > > >	MHCⅡ+	28.3	363
> > > > > >	Q3: Comp-APC-A+ , Comp-PE-A-	9.73	397
> > > > > > >	CD86+	17.6	70
> > > > > > >	MHCⅡ+	10.1	40
> > > > > >	Q4: Comp-APC-A- , Comp-PE-A-	5.83	238
> > > > > > >	CD86+	61.3	146
> > > > > > >	MHCⅡ+	51.7	123
> > > > >	macrophages	50.9	2149
> > > >	CD45.2+&F4\80+	3.71	2046
	8se_PE-Cy7 control_031.fcs		200000
	8se_P3(1)_019.fcs		200000
>	tumor	88.7	177351
> >	单细胞	94.7	167891
> > >	Live	57.2	96043
> > > >	CD45.2+	22.2	21357
> > > >	CD45.2+&CD3-	20.1	19303
> > > > >	CD11b+	88.7	17115
> > > > > >	Q1: Comp-APC-A- , Comp-PE-A+	38.3	6560
> > > > > > >	CD86+	85	5573
> > > > > > >	MHCⅡ+	79	5184
> > > > > >	Q2: Comp-APC-A+ , Comp-PE-A+	51.5	8822
> > > > > > >	CD86+	61.1	5394
> > > > > > >	MHCⅡ+	42.7	3769
> > > > > >	Q3: Comp-APC-A+ , Comp-PE-A-	7.57	1296
> > > > > > >	CD86+	27.6	358
> > > > > > >	MHCⅡ+	21.5	278
> > > > > >	Q4: Comp-APC-A- , Comp-PE-A-	2.55	437
> > > > > > >	CD86+	51.5	225
> > > > > > >	MHCⅡ+	51	223
> > > > >	macrophages	42.4	8192
> > > >	CD45.2+&F4\80+	8	7686
	8se_P3(2)_020.fcs		200000
>	tumor	84.7	169410
> >	单细胞	93.7	158759
> > >	Live	59.7	94775
> > > >	CD45.2+	18.2	17218
> > > >	CD45.2+&CD3-	16.7	15813
> > > > >	CD11b+	96.7	15298
> > > > > >	Q1: Comp-APC-A- , Comp-PE-A+	30	4596
> > > > > > >	CD86+	73.7	3387
> > > > > > >	MHCⅡ+	66.1	3040
> > > > > >	Q2: Comp-APC-A+ , Comp-PE-A+	32.4	4956
> > > > > > >	CD86+	51.5	2553
> > > > > > >	MHCⅡ+	34.7	1720
> > > > > >	Q3: Comp-APC-A+ , Comp-PE-A-	21.3	3261
> > > > > > >	CD86+	33.6	1096
> > > > > > >	MHCⅡ+	21.7	708
> > > > > >	Q4: Comp-APC-A- , Comp-PE-A-	16.2	2485
> > > > > > >	CD86+	65.1	1618
> > > > > > >	MHCⅡ+	42.1	1046
> > > > >	macrophages	17	2690
> > > >	CD45.2+&F4\80+	2.23	2111
	8se_P3(3)_021.fcs		200000
>	tumor	86.7	173390
> >	单细胞	94.3	163529
> > >	Live	33.8	55270
> > > >	CD45.2+	17.1	9467
> > > >	CD45.2+&CD3-	15.9	8802
> > > > >	CD11b+	93.2	8206
> > > > > >	Q1: Comp-APC-A- , Comp-PE-A+	52.4	4296
> > > > > > >	CD86+	88.2	3790
> > > > > > >	MHCⅡ+	63.5	2730
> > > > > >	Q2: Comp-APC-A+ , Comp-PE-A+	34.6	2836
> > > > > > >	CD86+	57.9	1643
> > > > > > >	MHCⅡ+	36	1020
> > > > > >	Q3: Comp-APC-A+ , Comp-PE-A-	8.42	691
> > > > > > >	CD86+	22.6	156
> > > > > > >	MHCⅡ+	19	131
> > > > > >	Q4: Comp-APC-A- , Comp-PE-A-	4.67	383
> > > > > > >	CD86+	48.3	185
> > > > > > >	MHCⅡ+	59.8	229
> > > > >	macrophages	49	4311
> > > >	CD45.2+&F4\80+	7.25	4008
	8se_P3(4)_022.fcs		200000
>	tumor	96.1	192156
> >	单细胞	95.1	182697
> > >	Live	80.5	147153
> > > >	CD45.2+	14.3	21027
> > > >	CD45.2+&CD3-	13.7	20092
> > > > >	CD11b+	92.2	18524
> > > > > >	Q1: Comp-APC-A- , Comp-PE-A+	63.1	11680
> > > > > > >	CD86+	95.6	11163
> > > > > > >	MHCⅡ+	87.7	10244
> > > > > >	Q2: Comp-APC-A+ , Comp-PE-A+	28.7	5311
> > > > > > >	CD86+	67.4	3580
> > > > > > >	MHCⅡ+	44.7	2374
> > > > > >	Q3: Comp-APC-A+ , Comp-PE-A-	5.98	1107
> > > > > > >	CD86+	18	199
> > > > > > >	MHCⅡ+	11.1	123
> > > > > >	Q4: Comp-APC-A- , Comp-PE-A-	2.3	426
> > > > > > >	CD86+	58.5	249
> > > > > > >	MHCⅡ+	63.6	271
> > > > >	macrophages	64	12860
> > > >	CD45.2+&F4\80+	8.45	12432
	8se_3x10e6_010.fcs		500000
>	tumor	96.2	480754
> >	单细胞	86.2	414243
> > >	Live	83.2	344485
> > > >	CD45.2+	29.7	102461
> > > >	CD45.2+&CD3-	22.6	77885
> > > > >	CD11b+	72.9	56745
> > > > > >	Q1: Comp-APC-A- , Comp-PE-A+	51.4	29152
> > > > > > >	CD86+	92.8	27064
> > > > > > >	MHCⅡ+	94.9	27676
> > > > > >	Q2: Comp-APC-A+ , Comp-PE-A+	44.5	25249
> > > > > > >	CD86+	75.2	18978
> > > > > > >	MHCⅡ+	68	17165
> > > > > >	Q3: Comp-APC-A+ , Comp-PE-A-	2.57	1456
> > > > > > >	CD86+	17.1	249
> > > > > > >	MHCⅡ+	24.5	357
> > > > > >	Q4: Comp-APC-A- , Comp-PE-A-	1.56	888
> > > > > > >	CD86+	39.4	350
> > > > > > >	MHCⅡ+	72.6	645
> > > > >	macrophages	54.6	42500
> > > >	CD45.2+&F4\80+	12.6	43514

## Sheet: Figure S1_T cell
	Name	Statistic	#Cells				F=Caerin	C=Clodronate		P3=Control
	T cell_BV421 control_055.fcs		200000
	T cell_F(1)_046.fcs		200050					PBS(1)	PBS(2)	PBS(3)	PBS(4)	PBS+C(1)	PBS+C(2)	PBS+C(3)	PBS+C(4)	P3(1)	P3(2)	P3(3)	P3(4)	F(1)	F(2)	F(3)	F+C(1)	F+C(2)	F+C(3)	F+C(4)
>	tumor	92.4	184854				tumor	87.4	89.1	87	87.6	92.1	89.8	92.1	88.3	88.5	85.2	87.9	96.5	92.4	96.6	97.6	96.7	97.7	97.2	97.3
> >	Single cell	93	171996				Single cell	92.8	92.1	93.4	93.6	93.2	93.7	95	94.6	94.5	93.6	93.6	93.1	93	93	93.5	86.8	92.8	94.3	93.8
> > >	Live	73.7	126782				Live	30.6	43.5	25.1	27.1	55.4	49.4	57.8	29.4	53.7	49.1	41	83.4	73.7	85.3	88.4	84.8	91	85.8	86.7
> > > >	CD45.2+	51.8	65695				CD45.2+	11	5.34	13.8	14.7	7.99	7.93	10.3	9.5	25.9	21.8	17.5	15.4	51.8	43.5	44.3	28.1	28.7	14	23.9
> > > > >	B220+	45.4	29857				B220+	66.9	66.3	63.1	74.3	55.6	73	65.4	65.9	46.1	38.8	58.7	76.8	45.4	35.7	42	57.7	53.6	65.3	61.6
> > > > >	CD3+	28.5	18744				CD3+	42.6	50	45.2	56.7	35.8	57.3	49.3	51.2	27.1	22.6	38.8	60.6	28.5	27.9	24.4	39.6	33.6	44.5	37.6
> > > >	CD45.2+&CD3+	19.6	24792				CD45.2+&CD3+	5.64	3.08	7.48	9.44	3.58	5.11	5.84	5.49	9.24	6.87	8.55	10.4	19.6	15.5	14.7	12.9	12	7.59	11.5
> > > > >	Q1: CD4+&CD8a-	10.9	2694				Q1: CD4+&CD8a-	9.04	10.1	9.83	10.4	8.72	8.06	7.17	7.97	12.2	15.3	13.2	6.41	10.9	11.3	9.71	19.6	8.03	9	5.22
> > > > >	Q2: CD4+&CD8a+	2.07	512				Q2: CD4+&CD8a+	0.89	0.32	0.29	0.26	0.32	0.14	0.3	0.37	0.58	0.45	0.26	0.33	2.07	1.9	1.19	2.72	1.31	0.59	0.5
> > > > >	Q3: CD4-&CD8a+	16.6	4113				Q3: CD4-&CD8a+	1.29	0.87	0.75	1.29	2.03	1.3	1.32	1.3	5.82	5.2	3.21	3.66	16.6	15.2	13.1	28	16.3	13.3	9.85
> > > > >	Q4: CD4-&CD8a-	70.5	17473				Q4: CD4-&CD8a-	88.8	88.7	89.1	88	88.9	90.5	91.2	90.4	81.4	79	83.3	89.6	70.5	71.6	76	49.7	74.3	77.1	84.4
	T cell_F(2)_047.fcs		200000
>	tumor	96.6	193248
> >	Single cell	93	179699
> > >	Live	85.3	153307					PBS(1)	PBS(2)	PBS(3)	PBS(4)	PBS+C(1)	PBS+C(2)	PBS+C(3)	PBS+C(4)	P3(1)	P3(2)	P3(3)	P3(4)	F(1)	F(2)	F(3)	F+C(1)	F+C(2)	F+C(3)	F+C(4)
> > > >	CD45.2+	43.5	66656				CD45.2+	11	5.34	13.8	14.7	7.99	7.93	10.3	9.5	25.9	21.8	17.5	15.4	51.8	43.5	44.3	28.1	28.7	14	23.9
> > > > >	B220+	35.7	23803				CD45.2+&CD3+	5.64	3.08	7.48	9.44	3.58	5.11	5.84	5.49	9.24	6.87	8.55	10.4	19.6	15.5	14.7	12.9	12	7.59	11.5
> > > > >	CD3+	27.9	18582				CD4+&CD8a-	9.04	10.1	9.83	10.4	8.72	8.06	7.17	7.97	12.2	15.3	13.2	6.41	10.9	11.3	9.71	19.6	8.03	9	5.22
> > > >	CD45.2+&CD3+	15.5	23738				CD4+&CD8a+	0.89	0.32	0.29	0.26	0.32	0.14	0.3	0.37	0.58	0.45	0.26	0.33	2.07	1.9	1.19	2.72	1.31	0.59	0.5
> > > > >	Q1: CD4+&CD8a-	11.3	2677				CD4-&CD8a+	1.29	0.87	0.75	1.29	2.03	1.3	1.32	1.3	5.82	5.2	3.21	3.66	16.6	15.2	13.1	28	16.3	13.3	9.85
> > > > >	Q2: CD4+&CD8a+	1.9	452				CD4-&CD8a-	88.8	88.7	89.1	88	88.9	90.5	91.2	90.4	81.4	79	83.3	89.6	70.5	71.6	76	49.7	74.3	77.1	84.4
> > > > >	Q3: CD4-&CD8a+	15.2	3618
> > > > >	Q4: CD4-&CD8a-	71.6	16991
	T cell_F(3)_048.fcs		200000
>	tumor	97.6	195116
> >	Single cell	93.5	182402
> > >	Live	88.4	161203
> > > >	CD45.2+	44.3	71377
> > > > >	B220+	42	29987
> > > > >	CD3+	24.4	17412
> > > >	CD45.2+&CD3+	14.7	23752
> > > > >	Q1: CD4+&CD8a-	9.71	2307
> > > > >	Q2: CD4+&CD8a+	1.19	282
> > > > >	Q3: CD4-&CD8a+	13.1	3101
> > > > >	Q4: CD4-&CD8a-	76	18062
	T cell_F+C(1)_050.fcs		200000
>	tumor	96.7	193431
> >	Single cell	86.8	167959
> > >	Live	84.8	142471
> > > >	CD45.2+	28.1	40052
> > > > >	B220+	57.7	23117
> > > > >	CD3+	39.6	15870
> > > >	CD45.2+&CD3+	12.9	18396
> > > > >	Q1: CD4+&CD8a-	19.6	3603
> > > > >	Q2: CD4+&CD8a+	2.72	501
> > > > >	Q3: CD4-&CD8a+	28	5158
> > > > >	Q4: CD4-&CD8a-	49.7	9134
	T cell_F+C(2)_051.fcs		200000
>	tumor	97.7	195424
> >	Single cell	92.8	181367
> > >	Live	91	164996
> > > >	CD45.2+	28.7	47283
> > > > >	B220+	53.6	25354
> > > > >	CD3+	33.6	15877
> > > >	CD45.2+&CD3+	12	19822
> > > > >	Q1: CD4+&CD8a-	8.03	1591
> > > > >	Q2: CD4+&CD8a+	1.31	259
> > > > >	Q3: CD4-&CD8a+	16.3	3239
> > > > >	Q4: CD4-&CD8a-	74.3	14733
	T cell_F+C(3)_052.fcs		200000
>	tumor	97.2	194492
> >	Single cell	94.3	183345
> > >	Live	85.8	157355
> > > >	CD45.2+	14	22079
> > > > >	B220+	65.3	14420
> > > > >	CD3+	44.5	9817
> > > >	CD45.2+&CD3+	7.59	11944
> > > > >	Q1: CD4+&CD8a-	9	1075
> > > > >	Q2: CD4+&CD8a+	0.59	70
> > > > >	Q3: CD4-&CD8a+	13.3	1585
> > > > >	Q4: CD4-&CD8a-	77.1	9214
	T cell_F+C(4)_053.fcs		200000
>	tumor	97.3	194698
> >	Single cell	93.8	182558
> > >	Live	86.7	158213
> > > >	CD45.2+	23.9	37797
> > > > >	B220+	61.6	23266
> > > > >	CD3+	37.6	14209
> > > >	CD45.2+&CD3+	11.5	18123
> > > > >	Q1: CD4+&CD8a-	5.22	946
> > > > >	Q2: CD4+&CD8a+	0.5	91
> > > > >	Q3: CD4-&CD8a+	9.85	1785
> > > > >	Q4: CD4-&CD8a-	84.4	15301
	T cell_PBS(1)_034.fcs		200000
>	tumor	87.4	174729
> >	Single cell	92.8	162189
> > >	Live	30.6	49589
> > > >	CD45.2+	11	5451
> > > > >	B220+	66.9	3647
> > > > >	CD3+	42.6	2322
> > > >	CD45.2+&CD3+	5.64	2798
> > > > >	Q1: CD4+&CD8a-	9.04	253
> > > > >	Q2: CD4+&CD8a+	0.89	25
> > > > >	Q3: CD4-&CD8a+	1.29	36
> > > > >	Q4: CD4-&CD8a-	88.8	2484
	T cell_PBS(2)_035.fcs		200000
>	tumor	89.1	178275
> >	Single cell	92.1	164261
> > >	Live	43.5	71373
> > > >	CD45.2+	5.34	3809
> > > > >	B220+	66.3	2527
> > > > >	CD3+	50	1903
> > > >	CD45.2+&CD3+	3.08	2195
> > > > >	Q1: CD4+&CD8a-	10.1	222
> > > > >	Q2: CD4+&CD8a+	0.32	7
> > > > >	Q3: CD4-&CD8a+	0.87	19
> > > > >	Q4: CD4-&CD8a-	88.7	1947
	T cell_PBS(3)_036.fcs		200000
>	tumor	87	173910
> >	Single cell	93.4	162444
> > >	Live	25.1	40841
> > > >	CD45.2+	13.8	5619
> > > > >	B220+	63.1	3545
> > > > >	CD3+	45.2	2542
> > > >	CD45.2+&CD3+	7.48	3053
> > > > >	Q1: CD4+&CD8a-	9.83	300
> > > > >	Q2: CD4+&CD8a+	0.29	9
> > > > >	Q3: CD4-&CD8a+	0.75	23
> > > > >	Q4: CD4-&CD8a-	89.1	2721
	T cell_PBS(4)_037.fcs		200000
>	tumor	87.6	175126
> >	Single cell	93.6	163864
> > >	Live	27.1	44360
> > > >	CD45.2+	14.7	6517
> > > > >	B220+	74.3	4844
> > > > >	CD3+	56.7	3696
> > > >	CD45.2+&CD3+	9.44	4186
> > > > >	Q1: CD4+&CD8a-	10.4	436
> > > > >	Q2: CD4+&CD8a+	0.26	11
> > > > >	Q3: CD4-&CD8a+	1.29	54
> > > > >	Q4: CD4-&CD8a-	88	3685
	T cell_PBS+C(1)_038.fcs		200000
>	tumor	92.1	184246
> >	Single cell	93.2	171778
> > >	Live	55.4	95191
> > > >	CD45.2+	7.99	7603
> > > > >	B220+	55.6	4225
> > > > >	CD3+	35.8	2724
> > > >	CD45.2+&CD3+	3.58	3406
> > > > >	Q1: CD4+&CD8a-	8.72	297
> > > > >	Q2: CD4+&CD8a+	0.32	11
> > > > >	Q3: CD4-&CD8a+	2.03	69
> > > > >	Q4: CD4-&CD8a-	88.9	3029
	T cell_PBS+C(2)_039.fcs		200000
>	tumor	89.8	179541
> >	Single cell	93.7	168160
> > >	Live	49.4	83089
> > > >	CD45.2+	7.93	6592
> > > > >	B220+	73	4813
> > > > >	CD3+	57.3	3774
> > > >	CD45.2+&CD3+	5.11	4242
> > > > >	Q1: CD4+&CD8a-	8.06	342
> > > > >	Q2: CD4+&CD8a+	0.14	6
> > > > >	Q3: CD4-&CD8a+	1.3	55
> > > > >	Q4: CD4-&CD8a-	90.5	3839
	T cell_PBS+C(3)_040.fcs		200000
>	tumor	92.1	184241
> >	Single cell	95	175036
> > >	Live	57.8	101088
> > > >	CD45.2+	10.3	10413
> > > > >	B220+	65.4	6805
> > > > >	CD3+	49.3	5132
> > > >	CD45.2+&CD3+	5.84	5903
> > > > >	Q1: CD4+&CD8a-	7.17	423
> > > > >	Q2: CD4+&CD8a+	0.3	18
> > > > >	Q3: CD4-&CD8a+	1.32	78
> > > > >	Q4: CD4-&CD8a-	91.2	5384
	T cell_PBS+C(4)_041.fcs		200000
>	tumor	88.3	176662
> >	Single cell	94.6	167098
> > >	Live	29.4	49113
> > > >	CD45.2+	9.5	4668
> > > > >	B220+	65.9	3076
> > > > >	CD3+	51.2	2389
> > > >	CD45.2+&CD3+	5.49	2697
> > > > >	Q1: CD4+&CD8a-	7.97	215
> > > > >	Q2: CD4+&CD8a+	0.37	10
> > > > >	Q3: CD4-&CD8a+	1.3	35
> > > > >	Q4: CD4-&CD8a-	90.4	2437
	T cell_PE-Cy7 control_054.fcs		200000
	T cell_P3(1)_042.fcs		200000
>	tumor	88.5	177089
> >	Single cell	94.5	167312
> > >	Live	53.7	89813
> > > >	CD45.2+	25.9	23272
> > > > >	B220+	46.1	10736
> > > > >	CD3+	27.1	6309
> > > >	CD45.2+&CD3+	9.24	8298
> > > > >	Q1: CD4+&CD8a-	12.2	1012
> > > > >	Q2: CD4+&CD8a+	0.58	48
> > > > >	Q3: CD4-&CD8a+	5.82	483
> > > > >	Q4: CD4-&CD8a-	81.4	6755
	T cell_P3(2)_043.fcs		200000
>	tumor	85.2	170343
> >	Single cell	93.6	159366
> > >	Live	49.1	78320
> > > >	CD45.2+	21.8	17083
> > > > >	B220+	38.8	6620
> > > > >	CD3+	22.6	3853
> > > >	CD45.2+&CD3+	6.87	5384
> > > > >	Q1: CD4+&CD8a-	15.3	824
> > > > >	Q2: CD4+&CD8a+	0.45	24
> > > > >	Q3: CD4-&CD8a+	5.2	280
> > > > >	Q4: CD4-&CD8a-	79	4256
	T cell_P3(3)_044.fcs		200000
>	tumor	87.9	175755
> >	Single cell	93.6	164511
> > >	Live	41	67529
> > > >	CD45.2+	17.5	11821
> > > > >	B220+	58.7	6941
> > > > >	CD3+	38.8	4589
> > > >	CD45.2+&CD3+	8.55	5771
> > > > >	Q1: CD4+&CD8a-	13.2	762
> > > > >	Q2: CD4+&CD8a+	0.26	15
> > > > >	Q3: CD4-&CD8a+	3.21	185
> > > > >	Q4: CD4-&CD8a-	83.3	4809
	T cell_P3(4)_045.fcs		200000
>	tumor	96.5	192963
> >	Single cell	93.1	179579
> > >	Live	83.4	149816
> > > >	CD45.2+	15.4	22999
> > > > >	B220+	76.8	17657
> > > > >	CD3+	60.6	13928
> > > >	CD45.2+&CD3+	10.4	15558
> > > > >	Q1: CD4+&CD8a-	6.41	998
> > > > >	Q2: CD4+&CD8a+	0.33	52
> > > > >	Q3: CD4-&CD8a+	3.66	569
> > > > >	Q4: CD4-&CD8a-	89.6	13939
	T cell_3x10e6_033.fcs		500000
