# Supplementary material for: Caerin 1.1/1.9 Enhances Antitumour Immunity by Activating the IFN-α Response Signalling Pathway of Tumour Macrophages
Source: Cancers (Basel). 2022 Nov 24;14(23):5785. doi: 10.3390/cancers14235785 (PMC9738106; doi:10.3390/cancers14235785)
Supplement: Supplementary file 1 [file cancers-14-05785-s001.zip › Table S2 ELISA.xlsx]

## Sheet: Figure 1D_IL6
	wavelength:450 nm													wavelength:570 nm
	1	2	3	4	5	6	7	8	9	10	11	12		1	2	3	4	5	6	7	8	9	10	11	12
A	0.488	2.032	1.357	0.853	0.503	0.308	0.214	0.165	0.143	0.126	0.11	0.09		0.043	0.054	0.05	0.047	0.047	0.044	0.045	0.043	0.044	0.045	0.045	0.042
B	0.467	2.09	1.374	0.859	0.495	0.32	0.217	0.167	0.146	0.134	0.108	0.05		0.044	0.051	0.048	0.046	0.044	0.043	0.043	0.042	0.047	0.049	0.043	0.048
C	0.748	0.762	0.724	0.532	0.49	0.48	0.476	0.497	0.501	0.352	0.355	0.338		0.046	0.045	0.044	0.047	0.043	0.045	0.043	0.046	0.043	0.043	0.044	0.043
D	0.418	0.417	0.404	0.275	0.272	0.284	1.865	0.244	0.933	1.776	1.348	0.398		0.044	0.043	0.043	0.042	0.042	0.042	0.049	0.046	0.049	0.049	0.048	0.045
E	1.288	1.2	1.346	1.362	0.882	0.841	0.904	0.758	0.075	0.086	0.08	0.05		0.049	0.047	0.047	0.046	0.044	0.045	0.045	0.045	0.042	0.043	0.042	0.048
F	1.142	0.958	1.382	1.332	0.289	2.694	2.487	2.591	0.077	0.079	0.083	0.051		0.045	0.046	0.048	0.048	0.046	0.052	0.052	0.056	0.042	0.042	0.042	0.047
G	0.258	0.267	0.177	0.185	0.171	0.167	0.132	0.126	1.746	0.886	0.417	0.232		0.043	0.05	0.042	0.045	0.042	0.042	0.049	0.042	0.05	0.045	0.044	0.042
H	0.17	0.174	0.222	0.214	0.101	0.162	0.121	0.101	0.089	0.086	0.087	0.083		0.043	0.045	0.043	0.043	0.041	0.042	0.042	0.04	0.041	0.042	0.043	0.041
Sample	1	2	3	4	5	6	7	8	9	10	11	12		Sample	1	2	3	4	5	6	7	8	9	10	11	12
A	0.445	1.978	1.307	0.806	0.456	0.264	0.169	0.122	0.099	0.081	0.065	0.048		A		500	250	125	62.5	31.25	15.625	7.8125	3.90625	1.95312	0		IL-6
B	0.423	2.039	1.326	0.813	0.451	0.277	0.174	0.125	0.099	0.085	0.065	0.002		B		500	250	125	62.5	31.25	15.625	7.8125	3.90625	1.95312	0
C	0.702	0.717	0.68	0.485	0.447	0.435	0.433	0.451	0.458	0.309	0.311	0.295		C	PBSQ1(1)	PBSQ1(2)	PBSQ1(3)	PBSQ2(1)	PBSQ2(2)	PBSQ2(3)	P3Q1(1)	P3Q1(2)	P3Q1(3)	P3Q2(1)	P3Q2(2)	P3Q2(3)
D	0.374	0.374	0.361	0.233	0.23	0.242	1.816	0.198	0.884	1.727	1.3	0.353		D	FQ1(1)	FQ1(2)	FQ1(3)	FQ2(1)	FQ2(2)	FQ2(3)				FQ1extra	FQ2extra	P3Q1 without MPLA
E	1.239	1.153	1.299	1.316	0.838	0.796	0.859	0.713	0.033	0.043	0.038	0.002		E	PBSQ1(1)	PBSQ1(2)	PBSQ2(1)	PBSQ2(2)	P3Q1(1)	P3Q1(2)	P3Q2(1)	P3Q2(2)
F	1.097	0.912	1.334	1.284	0.243	2.642	2.435	2.535	0.035	0.037	0.041	0.004		F	FQ1(1)	FQ1(2)	FQ2(1)	FQ2(2)	FQ2 without MPLA
G	0.215	0.217	0.135	0.14	0.129	0.125	0.083	0.084	1.696	0.841	0.373	0.19		G	PBSQ1(1)	PBSQ1(2)	PBSQ2(1)	PBSQ2(2)	P3Q1(1)	P3Q1(2)	P3Q2(1)	P3Q2(2)	2000	1000	500	250	IL-10
H	0.127	0.129	0.179	0.171	0.06	0.12	0.079	0.061	0.048	0.044	0.044	0.042		H	FQ1(1)	FQ1(2)	FQ2(1)	FQ2(2)	FQ2 without MPLA	125	62.5	31.25	15.625	7.8125	3.90625	0
IL-6		500	250	125	62.5	31.25	15.625	7.8125	3.90625	1.95312	0				PBSQ1(1)	PBSQ1(2)	PBSQ1(3)	PBSQ2(1)	PBSQ2(2)	PBSQ2(3)	P3Q1(1)	P3Q1(2)	P3Q1(3)	P3Q2(1)	P3Q2(2)	P3Q2(3)
		1.978	1.307	0.806	0.456	0.264	0.169	0.122	0.099	0.081	0.065			OD	0.702	0.717	0.68	0.485	0.447	0.435	0.433	0.451	0.458	0.309	0.311	0.295	0.445
		2.039	1.326	0.813	0.451	0.277	0.174	0.125	0.099	0.085	0.065			Concentration(pg/ml)	105.486	108.195	101.53	67.3511	60.8758	58.8435	58.5054	61.5545	62.744	37.8682	38.1959	35.5786	60.5366
	OD	2.0085	1.3165	0.8095	0.4535	0.2705	0.1715	0.1235	0.099	0.083	0.065				FQ1(1)	FQ1(2)	FQ1(3)	FQ2(1)	FQ2(2)	FQ2(3)				FQ1extra	FQ2extra	P3Q1 without MPLA
	Standard (pg/ml)	500	250	125	62.5	31.25	15.625	7.8125	3.90625	1.95312	0			OD	0.374	0.374	0.361	0.233	0.23	0.242				1.727	1.3	0.353	0.423
														Concentration(pg/ml)	48.6058	48.6058	46.4442	25.5375	25.0557	26.9851				312.241	220.769	45.1174	56.8172
															105.486	108.195	101.53	67.3511	60.8758	58.8435				37.8682	38.1959	35.5786
															48.6058	48.6058	46.4442	25.5375	25.0557	26.9851
															PBSQ1	PBSQ2	P3Q1	P3Q2	FQ1	FQ2
															105.486	67.3511	58.5054	37.8682	48.6058	25.5375
															108.195	60.8758	61.5545	38.1959	48.6058	25.0557
															101.53	58.8435	62.744	35.5786	46.4442	26.9851

## Sheet: Figure 1D_IL10&IL12
	1	2	3	4	5	6	7	8	9	10	11	12			1	2	3	4	5	6	7	8	9	10	11	12
A	2.921	3.202	2.844	2.179	1.541	0.971	0.58	0.352	0.23	0.164	0.103	0.09		A
B	2.881	3.17	2.623	2.178	1.453	0.953	0.577	0.344	0.225	0.162	0.091	0.082		B
C	0.15	0.154	0.153	0.212	0.212	0.218	0.214	0.189	0.209	0.309	0.311	0.295		C		PBSQ1(2)	PBSQ1(3)	PBSQ2(1)	PBSQ2(2)	PBSQ2(3)	P3Q1(1)	P3Q1(2)	P3Q1(3)	P3Q2(1)	P3Q2(2)	P3Q2(3)
D	0.387	0.341	0.388	0.709	0.755	0.785	0.319	0.246	0.323	1.051	1.704	0.194		D	FQ1(1)	FQ1(2)	FQ1(3)	FQ2(1)	FQ2(2)	FQ2(3)				FQ1extra	FQ2extra	P3Q1 without MPLA
E	0.226	2.167	1.224	0.781	0.322	0.206	0.147	0.123	0.106	0.104	0.096	0.087		E				PBSQ2(1)
F	0.19	2.224	1.275	0.651	0.346	0.21	0.147	0.118	0.11	0.102	0.093	0.089		F
G	1.442	1.44	1.43	0.669	0.738	0.733	0.513	0.526	0.532	0.261	0.262	0.233		G	PBSQ1(1)	PBSQ1(2)	PBSQ1(3)		PBSQ2(2)	PBSQ2(3)	P3Q1(1)	P3Q1(2)	P3Q1(3)	P3Q2(1)	P3Q2(2)	P3Q2(3)
H	0.461	0.466	0.451	0.311	0.307	0.341	3.059	0.269	1.172	1.565	1.341	0.479		H	FQ1(1)	FQ1(2)	FQ1(3)	FQ2(1)	FQ2(2)	FQ2(3)				FQ1extra	FQ2extra	P3Q1 without MPLA
IL12		500	250	125	62.5	31.25	15.625	7.8125	3.90625	1.95312	0				PBSQ1(1)	PBSQ1(2)	PBSQ1(3)	PBSQ2(1)	PBSQ2(2)	PBSQ2(3)	P3Q1(1)	P3Q1(2)	P3Q1(3)	P3Q2(1)	P3Q2(2)	P3Q2(3)
		3.202	2.844	2.179	1.541	0.971	0.58	0.352	0.23	0.164	0.103			OD	0.15	0.154	0.153	0.212	0.212	0.218	0.214	0.189	0.209	0.309	0.311	0.295
		3.17	2.623	2.178	1.453	0.953	0.577	0.344	0.225	0.162	0.091			Concentration (pg/ml)	1.71621	1.81808	1.79257	3.34741	3.34741	3.5112	3.40189	2.72926	3.26591	6.12351	6.18363	5.70596
	OD	3.186	2.7335	2.1785	1.497	0.962	0.5785	0.348	0.2275	0.163	0.097				FQ1(1)	FQ1(2)	FQ1(3)	FQ2(1)	FQ2(2)	FQ2(3)				FQ1extra	FQ2extra	P3Q1 without MPLA
	Standards (pg/ml)	500	250	125	62.5	31.25	15.625	7.8125	3.90625	1.95312	0			OD	0.387	0.341	0.388	0.709	0.755	0.785				1.051	1.704	0.194
														Concentration (pg/ml)	8.55413	7.09931	8.58644	20.4593	22.406	23.7086				36.4028	76.2834	2.86233
															1.71621	1.81808	1.79257	3.34741	3.34741	3.5112				6.12351	6.18363	5.70596
															8.55413	7.09931	8.58644	20.4593	22.406	23.7086
																PBSQ1	PBSQ2	P3Q1	P3Q2	FQ1	FQ2
																1.71621	3.34741	3.40189	6.12351	8.55413	20.4593
																1.81808	3.34741	2.72926	6.18363	7.09931	22.406
																1.79257	3.5112	3.26591	5.70596	8.58644	23.7086
IL10		500	250	125	62.5	31.25	15.625	7.8125	3.90625	1.95312	0				PBSQ1(1)	PBSQ1(2)	PBSQ1(3)	PBSQ2(1)	PBSQ2(2)	PBSQ2(3)	P3Q1(1)	P3Q1(2)	P3Q1(3)	P3Q2(1)	P3Q2(2)	P3Q2(3)
		2.167	1.224	0.651	0.322	0.206	0.147	0.123	0.106	0.104	0.096			OD值	1.442	1.44	1.43	0.781	0.738	0.733	0.513	0.526	0.532	0.261	0.262	0.233
		2.224	1.275	0.669	0.346	0.21	0.147	0.118	0.11	0.102	0.093			标准品(pg/ml)	303.557	303.066	300.615	148.877	139.336	138.23	90.4514	93.2283	94.5119	37.772	37.9767	32.0538
	OD值	2.1955	1.2495	0.66	0.334	0.208	0.147	0.1205	0.108	0.103	0.0945				FQ1(1)	FQ1(2)	FQ1(3)	FQ2(1)	FQ2(2)	FQ2(3)				FQ1extra	FQ2extra	P3Q1 without MPLA
	标准品(pg/ml)	500	250	125	62.5	31.25	15.625	7.8125	3.90625	1.95312	0			OD值	0.461	0.466	0.451	0.311	0.307	0.341				1.565	1.341	0.479
														标准品(pg/ml)	79.4018	80.4602	77.2876	48.0502	47.2248	54.2585				334.002	278.948	83.2161
															303.557	303.066	300.615	148.877	139.336	138.23				37.772	37.9767	32.0538
															79.4018	80.4602	77.2876	48.0502	47.2248	54.2585				334.002	278.948	83.2161
																PBSQ1	PBSQ2	P3Q1	P3Q2	FQ1	FQ2
																303.557	148.877	90.4514	48.0502	79.4018	37.772
																303.066	139.336	93.2283	47.2248	80.4602	37.9767
																300.615	138.23	94.5119	54.2585	77.2876	32.0538

## Sheet: Figure 1D_TNFa
	450nm														570nm
	1	2	3	4	5	6	7	8	9	10	11	12			1	2	3	4	5	6	7	8	9	10	11	12
A	3.212	2.95	2.512	1.59	1.025	0.608	0.337	0.24	0.173	0.15	0.096	2.135			0.057	0.056	0.06	0.051	0.046	0.046	0.047	0.044	0.048	0.057	0.043	0.05
B	3.218	3.034	2.464	1.671	1.024	0.615	0.365	0.239	0.171	0.139	1.513	2.04			0.057	0.054	0.055	0.055	0.049	0.044	0.044	0.045	0.043	0.043	0.049	0.051
C	1.787	1.826	1.796	1.637	1.619	1.695	1.864	1.887	1.807	1.553	1.509	1.512			0.05	0.05	0.051	0.051	0.051	0.049	0.049	0.052	0.05	0.054	0.048	0.048
D	1.473	1.495	1.524	1.544	1.51	1.35	2.474	2.459	2.476	1.755	1.74	1.72			0.049	0.048	0.048	0.049	0.047	0.048	0.052	0.052	0.053	0.05	0.049	0.052
E	1.98	2.055	0.245	1.219	1.199	1.054	1.834	1.923	1.907	1.293	1.286	1.37			0.051	0.052	0.043	0.047	0.046	0.046	0.05	0.05	0.05	0.05	0.048	0.051
F	1.837	0.979	0.515	0.288	0.182	0.132	0.109	0.104	0.095	0.099	0.096	0.096			0.049	0.048	0.043	0.041	0.043	0.042	0.042	0.042	0.042	0.044	0.043	0.043
G	0.316	0.315	0.317	0.294	0.293	0.303	0.109	0.098	0.096	0.092	0.097	0.204			0.046	0.042	0.043	0.042	0.043	0.043	0.042	0.044	0.044	0.042	0.044	0.042
H	0.32	0.31	0.303	0.311	0.278	0.269	0.227	0.226	0.217	0.269	0.257	0.244			0.045	0.044	0.041	0.05	0.041	0.041	0.043	0.041	0.042	0.044	0.043	0.041
Sample	1	2	3	4	5	6	7	8	9	10	11	12		Sample	1	2	3	4	5	6	7	8	9	10	11	12
A	3.155	2.894	2.452	1.539	0.979	0.562	0.29	0.196	0.125	0.093	0.053	2.085		A	500	250	125	62.5	31.25	15.625	7.8125	3.90625	1.95312	0.976562	0	P3Q1(3)	TNF-α
B	3.161	2.98	2.409	1.616	0.975	0.571	0.321	0.194	0.128	0.096	1.464	1.989		B	500	250	125	62.5	31.25	15.625	7.8125	3.90625	1.95312	0.976562	PBS无MPLA	F无MPLA
C	1.737	1.776	1.745	1.586	1.568	1.646	1.815	1.835	1.757	1.499	1.461	1.464		C	21Q1(1)	21Q1(2)	21Q1(3)	21Q2(1)	21Q2(2)	21Q2(3)	14Q1(1)	14Q1(2)	14Q1(3)	14Q2(1)	14Q2(2)	14Q2(3)
D	1.424	1.447	1.476	1.495	1.463	1.302	2.422	2.407	2.423	1.705	1.691	1.668		D	7Q1(1)	7Q1(2)	7Q1(3)	7Q2(1)	7Q2(2)	7Q2(3)	PBSQ1(1)	PBSQ1(2)	PBSQ1(3)	PBSQ2(1)	PBSQ2(2)	PBSQ2(3)
E	1.929	2.003	0.202	1.172	1.153	1.008	1.784	1.873	1.857	1.243	1.238	1.319		E	P3Q1(1)	P3Q1(2)		P3Q2(1)	P3Q2(2)	P3Q2(3)	FQ1(1)	FQ1(2)	FQ1(3)	FQ2(1)	FQ2(2)	FQ2(3)
F	1.788	0.931	0.472	0.247	0.139	0.09	0.067	0.062	0.053	0.055	0.053	0.053		F	2000	1000	500	250	125	62.5	31.25	15.625	7.8125	3.90625	1.95312	0	IL-10
G	0.27	0.273	0.274	0.252	0.25	0.26	0.067	0.054	0.052	0.05	0.053	0.162		G	21Q1(1)	21Q1(2)	21Q1(3)	21Q2(1)	21Q2(2)	21Q2(3)	31.25	15.625	7.8125	3.90625	1.95312	无MPLA
H	0.275	0.266	0.262	0.261	0.237	0.228	0.184	0.185	0.175	0.225	0.214	0.203		H	14Q1(1)	14Q1(2)	14Q1(3)	14Q2(1)	14Q2(2)	14Q2(3)	7Q1(1)	7Q1(2)	7Q1(3)	7Q2(1)	7Q2(2)	7Q2(3)
IL-10	2000	1000	500	250	125	62.5	31.25	15.625	7.8125	3.90625	1.95312	0
	1.788	0.931	0.472	0.247	0.139	0.09	0.067	0.058	0.0525	0.0525	0.053	0.053			21Q1(1)	21Q1(2)	21Q1(3)	21Q2(1)	21Q2(2)	21Q2(3)	14Q1(1)	14Q1(2)	14Q1(3)	14Q2(1)	14Q2(2)	14Q2(3)	7Q1(1)	7Q1(2)	7Q1(3)	7Q2(1)	7Q2(2)	7Q2(3)
	2000	1000	500	250	125	62.5	31.25	15.625	7.8125	3.90625	1.95312	0			0.27	0.273	0.274	0.252	0.25	0.26	0.275	0.266	0.262	0.261	0.237	0.228	0.184	0.185	0.175	0.225	0.214	0.203
															260.363	263.792	264.935	239.788	237.502	248.933	266.078	255.791	251.219	250.076	222.643	212.356	162.064	163.207	151.778	208.927	196.354	183.781
															21Q1	21Q2	14Q1	14Q2	7Q1	7Q2
															260.363	239.788	266.078	250.076	162.064	208.927
															263.792	237.502	255.791	222.643	163.207	196.354
															264.935	248.933	251.219	212.356	151.778	183.781
TNF-α	500	250	125	62.5	31.25	15.625	7.8125	3.90625	1.95312	0.9765	0
	3.158	2.937	2.4305	1.5775	0.977	0.5665	0.3055	0.195	0.1265	0.0945	0.053
	500	250	125	62.5	31.25	15.625	7.8125	3.90625	1.95312	0.9765	0
															PBSQ1(1)	PBSQ1(2)	PBSQ1(3)	PBSQ2(1)	PBSQ2(2)	PBSQ2(3)	P3Q1(1)	P3Q1(2)	P3Q1(3)	P3Q2(1)	P3Q2(2)	P3Q2(3)	FQ1(1)	FQ1(2)	FQ1(3)	FQ2(1)	FQ2(2)	FQ2(3)
															2.422	2.407	2.423	1.705	1.691	1.668	1.929	2.003	2.085	1.172	1.153	1.008	1.784	1.873	1.857	1.243	1.238	1.319
															124	122.76	124.083	71.2617	70.3647	68.9022	86.3048	91.5605	97.5505	40.7027	39.7494	32.7832	76.4184	82.4219	81.3275	44.3477	44.0868	48.3945
															PBSQ1	PBSQ2	P3Q1	P3Q2	FQ1	FQ2
															124	71.2617	86.3048	44.3477	76.4184	40.7027
															122.76	70.3647	91.5605	44.0868	82.4219	39.7494
															124.083	68.9022	97.5505	48.3945	81.3275	32.7832

## Sheet: Figure 5D_IL6&TNFa
	450nm
	1	2	3	4	5	6	7	8	9	10	11	12			1	2	3	4	5	6	7	8	9	10	11	12
A	2.466	1.634	0.959	0.565	0.347	1.074	0.184	0.15	0.131	0.115	0.501	0.565		A	2.412	1.582	0.911	0.516	0.3	1.015	0.136	0.104	0.087	0.071	0.453	0.513
B	0.54	0.543	0.527	0.504	0.506	0.474	0.566	0.577	0.564	0.553	0.566	0.533		B	0.496	0.497	0.483	0.457	0.463	0.428	0.521	0.532	0.518	0.507	0.518	0.488
C	0.519	0.536	0.554	0.641	0.613	0.639	0.762	0.862	0.822	0.611	0.624	0.586		C	0.473	0.492	0.51	0.596	0.569	0.595	0.718	0.816	0.774	0.563	0.578	0.541
D	0.887	1.04	0.962	0.665	0.627	0.626	0.994	1.007	1.037	0.733	0.713	0.656		D	0.84	0.994	0.915	0.621	0.581	0.581	0.947	0.961	0.989	0.687	0.667	0.609
E	2.197	1.472	0.875	0.536	0.339	0.226	0.171	0.146	0.113	0.721	0.785	0.544		E	2.145	1.424	0.828	0.492	0.296	0.183	0.129	0.104	0.071	0.673	0.738	0.499
F	3.288	3.097	2.768	2.14	1.431	0.891	0.56	0.367	0.134	0.054	0.053	0.053		F	3.225	3.041	2.714	2.089	1.383	0.845	0.515	0.324	0.091	0	0	0.001
G	1.962	1.992	1.972	1.585	1.595	1.558	1.931	1.971	1.944	1.581	1.607	1.601		G	1.913	1.942	1.922	1.536	1.545	1.509	1.88	1.918	1.893	1.532	1.559	1.551
H	2.042	2.049	1.942	1.775	1.752	1.764	3.306	3.24	3.308	0.131	0.132	0.13		H	1.992	2.001	1.894	1.723	1.703	1.716	3.252	3.186	3.247	0.089	0.091	0.089
	570nm
	1	2	3	4	5	6	7	8	9	10	11	12			1	2	3	4	5	6	7	8	9	10	11	12
A	0.054	0.052	0.048	0.049	0.047	0.059	0.048	0.046	0.044	0.044	0.048	0.052		A	2000	1000	500	250	125	62.5	31.25	15.625	0
B	0.044	0.046	0.044	0.047	0.043	0.046	0.045	0.045	0.046	0.046	0.048	0.045		B
C	0.046	0.044	0.044	0.045	0.044	0.044	0.044	0.046	0.048	0.048	0.046	0.045		C							7Q1(1)	7Q1(2)	7Q1(3)	7Q2(1)	7Q2(2)	7Q2(3)
D	0.047	0.046	0.047	0.044	0.046	0.045	0.047	0.046	0.048	0.046	0.046	0.047		D	21Q1(1)	21Q1(2)	21Q1(3)	21Q2(1)	21Q2(2)	21Q2(3)	14Q1(1)	14Q1(2)	14Q1(3)	14Q2(1)	14Q2(2)	14Q2(3)
E	0.052	0.048	0.047	0.044	0.043	0.043	0.042	0.042	0.042	0.048	0.047	0.045		E	500	250	125	62.5	31.25	15.625	7.8125	3.90625	0
F	0.063	0.056	0.054	0.051	0.048	0.046	0.045	0.043	0.043	0.054	0.053	0.052		F	500	250	125	62.5	31.25	15.625	7.8125	3.90625	0
G	0.049	0.05	0.05	0.049	0.05	0.049	0.051	0.053	0.051	0.049	0.048	0.05		G	21Q1(1)	21Q1(2)	21Q1(3)	21Q2(1)	21Q2(2)	21Q2(3)	14Q1(1)	14Q1(2)	14Q1(3)	14Q2(1)	14Q2(2)	14Q2(3)
H	0.05	0.048	0.048	0.052	0.049	0.048	0.054	0.054	0.061	0.042	0.041	0.041		H	7Q1(1)	7Q1(2)	7Q1(3)	7Q2(1)	7Q2(2)	7Q2(3)
IL6
	2.145	1.424	0.828	0.492	0.296	0.183	0.129	0.104	0.071
	500	250	125	62.5	31.25	15.625	7.8125	3.90625	0
															21Q1(1)	21Q1(2)	21Q1(3)	21Q2(1)	21Q2(2)	21Q2(3)	14Q1(1)	14Q1(2)	14Q1(3)	14Q2(1)	14Q2(2)	14Q2(3)	7Q1(1)	7Q1(2)	7Q1(3)	7Q2(1)	7Q2(2)	7Q2(3)
															0.84	0.994	0.915	0.621	0.581	0.581	0.947	0.961	0.989	0.687	0.667	0.609	0.718	0.816	0.774	0.563	0.578	0.541
															120.419	153.225	136.01	79.0941	72.2218	72.2218	142.885	145.935	152.112	90.8896	87.2552	77.0105	96.6261	115.585	107.306	69.1974	71.7148	65.5583
															120.419	153.225	136.01	79.0941	72.2218	72.2218	142.885	145.935	152.112	90.8896	87.2552	77.0105	96.6261	115.585	107.306	69.1974	71.7148	65.5583
															21Q1	21Q2	14Q1	14Q2	7Q1	7Q2
															120.419	79.0941	142.885	90.8896	96.6261	69.1974
															153.225	72.2218	145.935	87.2552	115.585	71.7148
															136.01	72.2218	152.112	77.0105	107.306	65.5583
															21Q1(1)	21Q1(2)	21Q1(3)	21Q2(1)	21Q2(2)	21Q2(3)	14Q1(1)	14Q1(2)	14Q1(3)	14Q2(1)	14Q2(2)	14Q2(3)	7Q1(1)	7Q1(2)	7Q1(3)	7Q2(1)	7Q2(2)	7Q2(3)
TNF-α	3.225	3.041	2.714	2.089	1.383	0.845	0.515	0.324	0.091						1.913	1.942	1.922	1.536	1.545	1.509	1.88	1.918	1.893	1.532	1.559	1.551	1.992	2.001	1.894	1.723	1.703	1.716
	500	250	125	62.5	31.25	15.625	7.8125	3.90625	0						53.8686	55.2104	54.2834	37.8234	38.1761	36.7739	52.3604	54.0988	52.9521	37.667	38.7278	38.4121	57.56	57.9878	52.9978	45.4575	44.6105	45.1602
															53.8686	55.2104	54.2834	37.8234	38.1761	36.7739	52.3604	54.0988	52.9521	37.667	38.7278	38.4121	57.56	57.9878	52.9978	45.4575	44.6105	45.1602
															21Q1	21Q2	14Q1	14Q2	7Q1	7Q2
															53.8686	37.8234	52.3604	37.667	57.56	45.4575
															55.2104	38.1761	54.0988	38.7278	57.9878	44.6105
															54.2834	36.7739	52.9521	38.4121	52.9978	45.1602

## Sheet: Figure 5D_IL12
检测结果
新程序 (2370)
2022/1/11 22:07:01
吸光度 1
波长:450 nm
板 1
															450nm-570nm
吸光值	1	2	3	4	5	6	7	8	9	10	11	12			1	2	3	4	5	6	7	8	9	10	11	12
A	3.232	2.781	2.428	1.744	1.154	0.687	0.423	0.275	0.099	0.52	0.677	0.355		A	3.163	2.704	2.37	1.688	1.1	0.637	0.376	0.229	0.053	0.473	0.629	0.31
B	0.623	0.541	0.586	0.817	0.755	0.793	0.401	0.398	0.369	0.4	0.409	0.393		B	0.578	0.495	0.54	0.769	0.708	0.743	0.356	0.354	0.32	0.354	0.365	0.346
C	2.338	1.637	0.972	0.593	0.342	0.239	0.168	0.138	0.102	0.475	0.659	0.735		C	2.283	1.585	0.924	0.548	0.298	0.196	0.125	0.095	0.058	0.43	0.613	0.69
D	0.455	0.486	0.366	0.765	0.767	0.788	0.754	0.784	0.778	0.715	0.666	0.694		D	0.408	0.439	0.32	0.718	0.72	0.742	0.708	0.738	0.731	0.669	0.619	0.646
E	1.815	1.288	0.853	0.504	0.316	0.207	0.154	0.124	0.091	0.894	0.563	0.803		E	1.761	1.239	0.805	0.459	0.272	0.164	0.112	0.081	0.047	0.848	0.517	0.755
F	1.008	1.011	1.135	0.85	0.816	0.862	1.081	1.079	0.977	0.607	0.555	0.506		F	0.956	0.962	1.086	0.805	0.763	0.815	1.034	1.032	0.929	0.561	0.508	0.46
G	3.007	2.74	2.237	1.641	1.06	0.641	0.396	0.258	0.104	1.695	1.958	2.014		G	2.945	2.685	2.183	1.591	1.014	0.596	0.351	0.214	0.06	1.644	1.907	1.964
H	2.059	1.654	1.696	1.744	1.775	1.827	2.081	2.098	2.027	1.71	1.735	1.71		H	2.007	1.602	1.644	1.692	1.72	1.774	2.027	2.046	1.974	1.658	1.684	1.657
波长:570 nm
板 1
吸光值	1	2	3	4	5	6	7	8	9	10	11	12			1	2	3	4	5	6	7	8	9	10	11	12
A	0.069	0.077	0.058	0.056	0.054	0.05	0.047	0.046	0.046	0.047	0.048	0.045		A
B	0.045	0.046	0.046	0.048	0.047	0.05	0.045	0.044	0.049	0.046	0.044	0.047		B	7Q1(1)	7Q1(2)	7Q1(3)	7Q2(1)	7Q2(2)	7Q2(3)	14Q1(1)	14Q1(2)	14Q1(3)	14Q2(1)	14Q2(2)	14Q2(3)
C	0.055	0.052	0.048	0.045	0.044	0.043	0.043	0.043	0.044	0.045	0.046	0.045		C
D	0.047	0.047	0.046	0.047	0.047	0.046	0.046	0.046	0.047	0.046	0.047	0.048		D
E	0.054	0.049	0.048	0.045	0.044	0.043	0.042	0.043	0.044	0.046	0.046	0.048		E
F	0.052	0.049	0.049	0.045	0.053	0.047	0.047	0.047	0.048	0.046	0.047	0.046		F
G	0.062	0.055	0.054	0.05	0.046	0.045	0.045	0.044	0.044	0.051	0.051	0.05		G
H	0.052	0.052	0.052	0.052	0.055	0.053	0.054	0.052	0.053	0.052	0.051	0.053		H
IL12															14Q1(1)	14Q1(2)	14Q1(3)	14Q2(1)	14Q2(2)	14Q2(3)	7Q1(1)	7Q1(2)	7Q1(3)	7Q2(1)	7Q2(2)	7Q2(3)
	3.163	2.704	2.37	1.688	1.1	0.637	0.376	0.229	0.053						0.356	0.354	0.32	0.354	0.365	0.346	0.578	0.495	0.54	0.769	0.708	0.743
	500	250	125	62.5	31.25	15.625	7.8125	3.90625	0						6.8712	6.82138	5.98983	6.82138	7.09658	6.62313	13.0197	10.5772	11.8801	19.2922	17.1901	18.3849
															6.8712	6.82138	5.98983	6.82138	7.09658	6.62313	13.0197	10.5772	11.8801	19.2922	17.1901	18.3849
															14Q1	14Q2	7Q1	7Q2
															6.8712	6.82138	13.0197	19.2922
															6.82138	7.09658	10.5772	17.1901
															5.98983	6.62313	11.8801	18.3849
