# Supplementary material for: Caerin 1.1/1.9 Enhances Antitumour Immunity by Activating the IFN-α Response Signalling Pathway of Tumour Macrophages
Source: Cancers (Basel). 2022 Nov 24;14(23):5785. doi: 10.3390/cancers14235785 (PMC9738106; doi:10.3390/cancers14235785)
Supplement: Supplementary file 1 [file cancers-14-05785-s001.zip › Table S3 qPCR&survival.xlsx]

## Sheet: qPCR
Raw data
	β-actin					Stat1					CCL4					Cav1					Coro7					Gnt2
Sample Name	Cт	Cт Mean	Cт SD		Sample Name	Cт	Cт Mean	Cт SD		Sample Name	Cт	Cт Mean	Cт SD		Sample Name	Cт	Cт Mean	Cт SD		Sample Name	Cт	Cт Mean	Cт SD		Sample Name	Cт	Cт Mean	Cт SD
Cream①	19.7978	19.8707	0.0857494		Cream①	24.4753	24.4449	0.027216		Cream①	27.8613	27.8397	0.106503		Cream①	20.0241	19.9454	0.0747321		Cream①	26.9371	26.9305	0.0109754		Cream①	22.937	22.7646	0.149325
Cream①	19.9652	19.8707	0.0857494		Cream①	24.4229	24.4449	0.027216		Cream①	27.9337	27.8397	0.106503		Cream①	19.8754	19.9454	0.0747321		Cream①	26.9178	26.9305	0.0109754		Cream①	22.6754	22.7646	0.149325
Cream①	19.849	19.8707	0.0857494		Cream①	24.4364	24.4449	0.027216		Cream①	27.724	27.8397	0.106503		Cream①	19.9367	19.9454	0.0747321		Cream①	26.9365	26.9305	0.0109754		Cream①	22.6815	22.7646	0.149325
Cream②	20.2172	20.0346	0.158203		Cream②	24.9426	24.8676	0.0696572		Cream②	28.2676	28.3271	0.0854478		Cream②	20.7382	20.7029	0.074599		Cream②	27.1563	26.961	0.184034		Cream②	23.2418	23.1665	0.114588
Cream②	19.9461	20.0346	0.158203		Cream②	24.8551	24.8676	0.0696572		Cream②	28.2886	28.3271	0.0854478		Cream②	20.6172	20.7029	0.074599		Cream②	26.7908	26.961	0.184034		Cream②	23.223	23.1665	0.114588
Cream②	19.9404	20.0346	0.158203		Cream②	24.805	24.8676	0.0696572		Cream②	28.425	28.3271	0.0854478		Cream②	20.7534	20.7029	0.074599		Cream②	26.9358	26.961	0.184034		Cream②	23.0346	23.1665	0.114588
Cream③	19.7447	19.759	0.183998		Cream③	24.7649	24.6908	0.104799		Cream③	28.7116	28.6558	0.0506732		Cream③	19.9728	19.8899	0.113426		Cream③	26.937	26.8279	0.154274		Cream③	22.759	22.7403	0.056405
Cream③	19.9498	19.759	0.183998		Cream③	24.6167	24.6908	0.104799		Cream③	28.6429	28.6558	0.0506732		Cream③	19.9362	19.8899	0.113426		Cream③	26.7188	26.8279	0.154274		Cream③	22.785	22.7403	0.056405
Cream③	19.5827	19.759	0.183998		Untreated①	25.6091	25.6894	0.113618		Cream③	28.6128	28.6558	0.0506732		Cream③	19.7606	19.8899	0.113426		Untreated①	27.506	27.4226	0.0850615		Cream③	22.6769	22.7403	0.056405
Untreated①	19.9425	19.787	0.185832		Untreated①	25.7698	25.6894	0.113618		Untreated①	28.6709	28.6601	0.0152363		Untreated①	20.6948	20.8004	0.0974633		Untreated①	27.4259	27.4226	0.0850615		Untreated①	23.4414	23.3213	0.130882
Untreated①	19.5812	19.787	0.185832		Untreated②	25.3199	25.4192	0.140389		Untreated①	28.6494	28.6601	0.0152363		Untreated①	20.8197	20.8004	0.0974633		Untreated①	27.336	27.4226	0.0850615		Untreated①	23.3407	23.3213	0.130882
Untreated①	19.8374	19.787	0.185832		Untreated②	25.5184	25.4192	0.140389		Untreated②	28.7118	28.7382	0.03727		Untreated①	20.8868	20.8004	0.0974633		Untreated②	27.4275	27.5906	0.195678		Untreated①	23.1818	23.3213	0.130882
Untreated②	20.2087	20.1847	0.0614656		Untreated③	24.9226	24.9886	0.0778374		Untreated②	28.7646	28.7382	0.03727		Untreated②	20.8544	20.7605	0.132905		Untreated②	27.5368	27.5906	0.195678		Untreated②	23.7268	23.6842	0.0711049
Untreated②	20.1148	20.1847	0.0614656		Untreated③	24.9687	24.9886	0.0778374		Untreated③	28.6101	28.6884	0.110686		Untreated②	20.6665	20.7605	0.132905		Untreated②	27.8076	27.5906	0.195678		Untreated②	23.6021	23.6842	0.0711049
Untreated②	20.2306	20.1847	0.0614656		Untreated③	25.0744	24.9886	0.0778374		Untreated③	28.7667	28.6884	0.110686		Untreated③	20.5264	20.4385	0.11923		Untreated③	27.0794	27.0931	0.139366		Untreated②	23.7237	23.6842	0.0711049
Untreated③	19.7318	19.8172	0.130643												Untreated③	20.4863	20.4385	0.11923		Untreated③	27.2388	27.0931	0.139366		Untreated③	23.5476	23.642	0.0854567
Untreated③	19.7523	19.8172	0.130643												Untreated③	20.3028	20.4385	0.11923		Untreated③	26.9611	27.0931	0.139366		Untreated③	23.6643	23.642	0.0854567
Untreated③	19.9676	19.8172	0.130643																						Untreated③	23.7141	23.642	0.0854567
calculations
β-actin				Stat1						CCL4						Cav1						Coro7						Gnt2
Sample Name	Cт Mean	Mean		Cт Mean	ΔCт Mean	ΔCт Mean Mean	ΔΔCт	RQ		Cт Mean	ΔCт Mean	ΔCт Mean Mean	ΔΔCт	RQ		Cт Mean	ΔCт Mean	ΔCт Mean Mean	ΔΔCт	RQ		Cт Mean	ΔCт Mean	ΔCт Mean Mean	ΔΔCт	RQ		Cт Mean	ΔCт Mean	ΔCт Mean Mean	ΔΔCт	RQ
Cream	19.8707	19.8881		24.4449	4.5568	4.77967	-0.222868	1.16705		27.8397	7.95159	8.38609	-0.434501	1.35144		19.9454	0.057284	0.291291	-0.234007	1.1761		26.9305	7.04237	7.01834	0.0240313	0.983481		22.7646	2.87652	3.00237	-0.125851	1.09115
	20.0346			24.8676	4.97949		0.199823	0.870657		28.3271	8.439		0.0529105	0.96399		20.7029	0.814822		0.523531	0.695667		26.961	7.07286		0.0545184	0.962916		23.1665	3.27837		0.276004	0.825875
	19.759			24.6908	4.80271		0.0230446	0.984154		28.6558	8.76768		0.381591	0.767591		19.8899	0.00176684		-0.289524	1.22224		26.8279	6.93979		-0.0785497	1.05596		22.7403	2.85221		-0.150153	1.10969
Untreated	19.787	19.9297		25.6894	5.75976		0.980097	0.506945		28.6601	8.73047		0.344385	0.787644		20.8004	0.870786		0.579495	0.669198		27.4226	7.49299		0.474655	0.719639		23.3213	3.39165		0.38928	0.76351
	20.1847			25.4192	5.4895		0.709838	0.611389		28.7382	8.80855		0.42246	0.746151		20.7605	0.8308		0.539509	0.688005		27.5906	7.66099		0.642654	0.640534		23.6842	3.75455		0.752186	0.593703
	19.8172			24.9886	5.05892		0.279259	0.824014		28.6884	8.75874		0.372648	0.772364		20.4385	0.508861		0.21757	0.860013		27.0931	7.16348		0.145145	0.904289		23.642	3.71232		0.709951	0.611341
																								23.3213	22.7646	0.0107004
																								23.6842	23.1665
																								23.642	22.7403

## Sheet: Figure 2 CDE_1
		PBS+PBS+PBS						PBS+PBS+PBS+Clodronate						Control+EX/MPLA/α-IL10R+α-PD-1						Caerin+EX/MPLA/α-IL10R+α-PD-1						Caerin+EX/MPLA/α-IL10R+α-PD-1+Clodronate
Date	No.	9	11	21	41	44	45	8	12	24	47	48	50	14	15	16	20	26	36	12	17	31	43	47	49	61	64	65	66	68	70
2021-09-14	Length	3.14	3.23	3.52	3.28	3.33	3.42	3.52	3.13	3.58	3.21	3.22	3.22	3.15	3.25	3.45	3.52	3.52	3.35	3.23	3.37	3.42	3.43	3.37	3.42	3.25	3.13	3.18	3.28	3.13	3.32
3	Width	3.05	3.13	3.13	3.17	3.12	3.02	3.32	3.12	3.25	3.03	3.18	3.17	3.12	3.22	3.23	3.17	3.17	3.23	3.18	3.12	3.25	3.27	3.28	3.23	3.15	3.02	3.12	3.13	3.05	3.23
	Volume	14.6049	15.822	17.2425	16.4802	16.2078	15.5959	19.3994	15.2343	18.9069	14.7353	16.281	16.1787	15.3317	16.8486	17.9968	17.6861	17.6861	17.4751	16.3315	16.4025	18.0619	18.3383	18.1279	17.8403	16.1241	14.2734	15.4777	16.0669	14.5584	17.3186
2021-09-16	Length	5.11	4.24	4.29	5.78	5.31	4.18	5.09	4.25	5.27	4.22	3.62	4.37	4.85	4.95	4.91	4.89	4.83	3.89	3.52	3.75	4.53	3.95	3.96	4.13	4.23	3.35	3.25	3.95	3.52	4.23
5	Width	3.87	3.28	4.11	4.67	4.23	3.87	4.3	3.98	4.16	3.83	3.58	3.82	4.26	3.65	3.28	3.99	3.62	3.5	3.13	3.72	4	3.83	3.39	4.12	4.15	3.24	3.2	3.32	3.42	4.05
	Volume	38.266	22.8078	36.2336	63.0277	47.5056	31.3017	47.057	33.6608	45.6003	30.9514	23.1977	31.8844	44.0079	32.9732	26.4119	38.9246	31.6471	23.8263	17.2425	25.947	36.24	28.9711	22.7544	35.0521	36.4256	17.5835	16.64	21.7692	20.5857	34.6913
2021-09-18	Length	6.07	5.03	5.64	6.07	6.34	4.34	7.23	6.03	6.24	5.66	4.47	6.11	5.66	5.25	6.24	5.28	6.28	5.47	5.15	5.18	6.21	5.21	4.68	5.94	5.88	4.14	3.32	4.98	4.38	5.22
7	Width	4.08	3.78	5.06	4.42	4.34	4.23	5.9	4.58	5.17	4.65	3.85	3.82	4.81	4.72	4.56	4.1	3.58	4.85	4.93	5.03	4.23	4.86	4.59	4.91	5.8	4.04	3.21	4.21	4.27	4.2
	Volume	50.5218	35.9353	72.2022	59.293	59.7089	38.8276	125.838	63.2438	83.3942	61.1917	33.1283	44.5798	65.4752	58.4808	64.876	44.3784	40.2435	64.334	62.5851	65.5293	55.5575	61.5291	49.2994	71.6011	98.9016	33.7857	17.1048	44.133	39.9301	46.0404
2021-09-20	Length	8.17	7.23	7.83	8.53	9.27	8.78	9.78	8.02	8.78	7.26	6.17	8.83	7.13	7.02	7.82	6.17	7.92	7.95	5.13	5.17	5.13	5.61	4.69	5.13	7.34	4.52	3.44	5.66	4.74	5.43
9	Width	6.34	5.38	6.87	6.23	6.78	6.23	7.37	5.78	5.93	5.28	5.26	5.78	6.28	5.87	5.14	5.02	4.87	6.23	4.29	4.92	4.12	5.13	4.37	4.82	5.7	4.25	3.31	5.2	4.35	4.53
	Volume	164.199	104.634	184.776	165.537	213.064	170.389	265.61	133.968	154.374	101.199	85.3545	147.498	140.598	120.944	103.301	77.7432	93.9189	154.281	47.2065	62.5735	43.5393	73.8189	44.7822	59.5911	119.238	40.8212	18.8445	76.5232	44.8463	55.7142
2021-09-22	Length	12.59	8.87	9.34	10.29	12.7	10.2	12.22	9.02	10.31	9.12	8.19	11.76	8.96	8.42	8.74	7.64	9.86	9.15	4.81	5.16	4.89	6.23	4.74	4.9	7.92	5.32	4.62	6.21	5.23	6.23
10	Width	8.28	6.78	8.71	7.49	8.45	8.53	11.47	6.38	6.97	7.92	6.13	7.68	8.25	7.66	5.74	5.56	6.68	8.4	4.49	4.82	4.45	5.58	4.28	4.79	6.59	4.63	3.82	5.61	4.56	5.21
	Volume	431.575	203.87	354.285	288.635	453.406	371.081	803.837	183.577	250.435	286.032	153.877	346.817	304.92	247.024	143.981	118.09	219.988	322.812	48.485	59.9396	48.4171	96.9899	43.4146	56.213	171.975	57.0222	33.7084	97.7209	54.3753	84.5539
2021-09-24	Length	13.87	10.17	10.82	13.87	13.96	11.98	14.76	12.06	13.16	11.04	9.98	14.07	9.53	9.23	8.92	7.93	10.43	10.98	5.87	4.6	3.5	6.53	3.5	4.85	8.3	4.36	5.53	6.59	4.74	5.47
13	Width	9.78	7.83	9.87	8.52	9.78	9.12	13.78	8.65	9.35	9.36	7.56	10.28	8.78	8.13	5.93	5.92	6.93	9.23	5.3	4.5	3.5	5.62	3.5	4.13	6.61	4.13	4.46	5.32	4.18	4.91
	Volume	663.322	311.756	527.025	503.414	667.626	498.215	1401.38	451.18	575.24	483.605	285.196	743.448	367.326	305.037	156.835	138.959	250.45	467.709	82.4441	46.575	21.4375	103.123	21.4375	41.363	181.322	37.184	55.0003	93.2564	41.4096	65.9357
2021-09-26	Length	16.05	12.1	11.92	15.48	15.86	13.72	15.78	13.78	13.96	12.56	11.5	15.78	10.9	10.13	9.3	8.99	11.43	12.22	6.64	3.5	3.5	6.99	3.5	4.79	8.54	5.17	5.62	7.96	5.32	5.83
15	Width	10.6	8.99	11.26	9.61	10.26	10.92	14.23	9.67	9.78	9.83	8.78	10.92	10.67	8.42	6.4	6.62	7.56	10.93	5.4	3.5	3.5	5.74	3.5	3.92	7.16	4.96	4.63	5.62	4.74	5.02
	Volume	901.689	488.962	755.654	714.805	834.772	818.03	1597.67	644.276	667.626	606.829	443.258	940.854	620.477	359.09	190.464	196.991	326.633	729.931	96.8112	21.4375	21.4375	115.152	21.4375	36.8025	218.904	63.5951	60.2377	125.706	59.7638	73.4592
2021-09-28	Length		15.31	14.39			16.89		15.1	14.47	13.54	12.6		13.44	12	10.78	11.52	12.15	13.91	8.78	3.5	3.2	9.17	3.5	4	10.39	5.2	5.72	11.11	5.63	5.88
17	Width		9.89	12.92			13.04		10.74	10.17	10.96	10.13		12.1	10.21	8.09	8.22	8.78	11.46	6.69	3.5	3.2	6.82	3.5	4	10.25	5.03	4.62	6.99	5.2	5.03
	Volume		748.752	1201.04			1436		870.874	748.308	813.223	646.486		983.875	625.465	352.765	389.194	468.312	913.411	196.479	21.4375	16.384	213.259	21.4375	32	545.8	65.7823	61.045	271.418	76.1176	74.3846
2021-09-30	Length			15.37						15.78	14.53	13.89		13.48	12.62	11.45	12.13	12.17	14.13	9.2	0	3.5	10.22	0	4.48	11.52	5.5	5.77	11.3	5.83	5.88
19	Width			13.91						12.25	11.83	11.23		12.97	10.72	8.62	9.23	9.49	11.58	7.47	0	3.5	7.17	0	4.28	10.26	5.32	4.92	7.28	5.05	5.06
	Volume			1486.96						1183.99	1016.73	875.854		1133.81	725.135	425.393	516.695	548.016	947.391	256.684	0	21.4375	262.699	0	41.0332	606.341	77.8316	69.8355	299.441	74.3398	75.2746
2021-10-02	Length										16.39	15.49		15.28	14.79	12.91	13.53	13.37	15.34	12.9	0	5.72	12.06	0	5.31	13.18	5.94	5.82	11.98	6.57	5.92
21	Width										12.98	12.13		14.79	12.24	9.78	9.85	10.27	12.06	8.97	0	5.32	9.85	0	4.87	10.28	5.82	5.27	8.05	5.08	5.05
	Volume										1380.7	1139.58		1671.2	1107.9	617.41	656.357	705.086	1115.55	518.973	0	80.9449	585.046	0	62.9684	696.421	100.601	80.8191	388.167	84.774	75.4874
2021-10-04	Length														16.28	14.56	15.37	15.19		13.15	0	6.75	12.93	0	6.78	15.18	7.09	6.32	13.61	7.09	6.74
23	Width														13.74	10.98	10.92	12.52		9.78	0	5.72	10.23	0	5.35	12.12	6.63	6.09	8.74	6.11	5.26
	Volume														1536.73	877.68	916.409	1190.52		628.888	0	110.425	676.581	0	97.0303	1114.93	155.827	117.198	519.818	132.342	93.2398
2021-10-06	Length															15.25				14.13	0	7.38	13.15	0	6.83			8.23	15.18	7.18	8.08
25	Width															12.72				10.23	0	6.34	10.31	0	5.45			7.58	9.52	6.12	5.92
	Volume															1233.71				739.373	0	148.322	698.897	0	101.434			236.433	687.885	134.461	141.587
2021-10-08	Length																			15.23	0	8.43	13.9	0	7.05			10.25		7.42	8.68
27	Width																			11.28	0	6.44	10.32	0	5.63			8.02		6.23	6.65
	Volume																			968.92	0	174.811	740.192	0	111.732			329.642		143.996	191.926
2021-10-09	Length																				0	8.93	15.23	0	7.23			10.53		7.93	9.58
29	Width																				0	7.05	12.58	0	6.92			8.25		6.52	6.95
	Volume																				0	221.922	1205.12	0	173.109			358.349		168.554	231.369
2021-10-12	Length																				0	9.4		0	7.6			11.12		8.85	10.14
31	Width																				0	9.23		0	7.38			8.52		7.03	7.83
	Volume																				0	400.407		0	206.965			403.603		218.687	310.836
2021-10-14	Length																				0	10.11		0	8.08			11.52		9.88	11.55
33	Width																				0	9.86		0	7.41			8.59		8.95	8.72
	Volume																				0	491.445		0	221.829			425.019		395.706	439.122
2021-10-16	Length																				0	11.38		0	8.35			12.23		11.01	12.53
35	Width																				0	10.02		0	8.23			8.67		10.51	9.88
	Volume																				0	571.278		0	282.785			459.658		608.083	611.554
2021-10-18	Length																				0	12.85		0	9.6			12.53		12.53	13.55
37	Width																				0	10.56		0	9.21			8.93		10.48	11.22
	Volume																				0	716.475		0	407.156			499.602		688.087	852.894
2021-10-20	Length																				0	13.7		0	9.87			12.95		13.25	14.52
39	Width																				0	10.95		0	9.71			9.25		11.63	11.93
	Volume																				0	821.332		0	465.292			554.017		896.077	1033.28
2021-10-22	Length																				0	15.34		0	10.02			13.81		14.69	15.71
41	Width																				0	11.55		0	9.83			9.36		12.58	12.44
	Volume																				0	1023.2		0	484.111			604.944		1162.39	1215.59
2021-10-24	Length																				0			0	10.52			14.52		15.63
43	Width																				0			0	10.23			9.98		13.28
	Volume																				0			0	550.474			723.099		1378.24
2021-10-26	Length																				0			0	11.08			14.83
45	Width																				0			0	11.02			10.32
	Volume																				0			0	672.78			789.715
2021-10-28	Length																				0			0	11.92			15.97
47	Width																				0			0	11.09			12.2
	Volume																				0			0	733.009			1188.49
2021-10-30	Length																				0			0	12.81
49	Width																				0			0	11.36
	Volume																				0			0	826.563
2021-11-01	Length																				0			0	13.56
51	Width																				0			0	11.86
	Volume																				0			0	953.672
2021-11-03	Length																				0			0	14.02
53	Width																				0			0	12.38
	Volume																				0			0	1074.38
2021-11-05	Length																				0			0	15.25
55	Width																				0			0	13.68
	Volume																								1426.96

## Sheet: Figure 2 CDE_2
		PBS+PBS+PBS+PBS						PBS+PBS+PBS+Clodronate						Control+EX/MPLA/α-IL10R+α-PD-1						Caerin+EX/MPLA/α-IL10R+α-PD-1						Caerin+EX/MPLA/α-IL10R+α-PD-1+Clodronate
2021-10-12	No.	57	79	90	91	95	98	62	63	67	69	72	78	58	60	87	92	94	97	80	81	82	83	84	85	71	73	74	75	76	77
2021-10-15	Length	3.23	3.32	3.47	3.23	3.08	3.53	3.18	3.23	3.37	3.39	3.23	3.05	3.72	3.52	3.31	3.25	3.27	3.15	3.2	3.23	3.52	3.45	3.46	3.23	3.32	3.18	3.25	3.32	3.42	3.32
3	Width	3.15	3.13	3.15	3.15	3.13	3.17	3.15	3.18	3.18	3.25	3.17	3.02	3.23	3.24	3.3	3.03	3.21	3.03	3.1	3.1	3.23	3.28	3.27	3.15	3.15	3.14	3.15	3.02	3.33	3.2
	Volume	16.0248	16.2629	17.2155	16.0248	15.0872	17.7363	15.7768	16.3315	17.0394	17.9034	16.229	13.9086	19.4052	18.4758	18.0229	14.919	16.8472	14.4599	15.376	15.5202	18.3619	18.5582	18.4987	16.0248	16.4713	15.6768	16.1241	15.1399	18.962	16.9984
2021-10-17	Length	3.52	3.67	3.75	3.72	4.23	4.1	4.52	4.78	3.95	3.53	4.23	3.95	4.12	4.13	4.35	4.53	3.78	3.92	3.23	3.55	3.62	3.52	3.49	3.35	3.95	4.12	3.78	3.52	3.62	3.78
5	Width	3.17	3.52	3.25	3.13	4.13	4.03	4.13	4.23	3.39	3.5	4.11	3.23	4.1	3.32	3.62	3.52	3.42	3.52	3.2	3.52	3.28	3.23	3.3	3.24	3.53	4.03	3.23	3.23	3.5	3.59
	Volume	17.6861	22.7364	19.8047	18.2222	36.0753	33.2938	38.5486	42.764	22.6969	21.6212	35.7268	20.605	34.6286	22.7613	28.5021	28.0643	22.1062	24.2852	16.5376	21.993	19.4727	18.3619	19.003	17.5835	24.6103	33.4563	19.7182	18.3619	22.1725	24.3585
2021-10-19	Length	5.73	6.98	5.28	4.33	5.41	5.14	6.34	7.3	5.32	4.32	6.06	5.64	5.24	5.42	4.54	5.13	5.1	4.57	4.39	5.68	5.21	4.21	4.67	4.66	5.49	5.98	4.71	4.38	4.52	6.18
7	Width	5.01	4.62	4.35	4.21	4.55	4.7	4.4	4.51	4.3	4.06	4.61	4.5	4.2	3.85	3.92	4.07	3.85	4.02	4.21	4.64	3.72	3.17	3.34	4.59	4.49	4.98	4.21	4.19	4.41	4.96
	Volume	71.9118	74.492	49.9554	38.3727	56.0003	56.7713	61.3712	74.2414	49.1834	35.6046	64.3939	57.105	46.2168	40.169	34.8817	42.489	37.7974	36.9265	38.9044	61.1441	36.049	21.1529	26.0483	49.0887	55.3395	74.1532	41.7403	38.4479	43.9527	76.0189
2021-10-21	Length	7.48	8.74	6.58	5.06	6.94	6.63	8.51	8.79	6.75	5.55	7.91	7.59	5.92	7.36	5.26	6.27	6.9	5.4	4.45	5.83	5.85	4.62	4.72	4.73	5.65	6.02	4.52	4.52	6.36	6.21
9	Width	5.26	6.19	5.19	4.94	5.92	6.19	5.79	5.27	5.81	5.26	5.86	5.81	5.66	5.26	4.72	5.12	4.58	5.35	4.32	4.56	4.23	3.87	3.46	4.62	4.83	5.21	4.72	4.21	5.19	4.98
	Volume	103.477	167.441	88.6198	61.7411	121.611	127.018	142.645	122.062	113.927	76.7776	135.813	128.104	94.8254	101.817	58.5922	82.1821	72.3686	77.2807	41.5238	60.6133	52.3367	34.5966	28.253	50.4795	65.9041	81.7037	50.3492	40.0565	85.6568	77.0052
2021-10-23	Length	9.48	10.02	7.72	6.48	7.92	7.91	9.71	11.27	7.88	6.44	9.79	8.84	6.43	7.56	6.44	7.29	7.23	6.41	4.5	6.22	5.23	4.93	4.83	4.82	5.83	7.24	5.92	5.71	6.56	6.6
11	Width	7.09	8.62	6.42	5.54	7.25	6.98	6.93	7.33	6.9	6.21	7.96	8.45	5.98	5.78	5.59	5.63	4.03	5.98	4.4	4.93	4.29	4.37	3.53	4.72	5.03	5.86	5.02	5.03	5.77	4.99
	Volume	238.271	372.265	159.095	99.4408	208.148	192.689	233.161	302.762	187.583	124.176	310.155	315.599	114.97	126.284	100.619	115.535	58.7109	114.612	43.56	75.5882	48.1267	47.0739	30.0931	53.6909	73.7521	124.309	74.5932	72.2341	109.201	82.1703
2021-10-25	Length	12.42	13.41	9.71	8.24	11.29	10.2	11.92	13.49	10.77	9.08	12.29	11.41	7.65	7.86	7.01	7.56	6.93	7.57	3.5	4.36	4.32	3.71	3.5	0	5.37	7.67	4.34	5.82	4.64	5.74
13	Width	9.53	10.37	9.46	7.74	8.81	9.68	8.29	9.52	8.82	7.08	8.53	9.12	6.48	5.97	5.96	5.72	4.51	6.99	3.5	3.41	3.88	3.13	3.5	0	4.28	6.2	4.2	5.23	4.32	4.59
	Volume	563.998	721.035	434.482	246.819	438.143	477.882	409.596	611.302	418.912	227.574	447.116	474.51	160.613	140.069	124.503	123.676	70.4784	184.935	21.4375	25.3493	32.5175	18.1732	21.4375	0	49.1849	147.417	38.2788	79.5969	43.2968	60.4654
2021-10-27	Length	13.81	15.45	11.52	10.23	13.14	11.59	13.82	15.83	11.83	9.65	13.69	13.89	8.23	8.82	8.59	9.83	7.92	8.83	0	4.66	4.67	3.5	3.5	0	5.73	7.93	4.5	6.73	5.22	6.14
15	Width	10.92	11.62	11.43	8.96	9.76	10.81	9.93	11.03	10.03	8.23	9.83	11.34	6.73	6.52	6.72	6.75	4.89	7.82	0	3.52	4.08	3.5	3.5	0	4.44	6.93	4.2	6.52	5.14	5.34
	Volume	823.396	1043.06	752.515	410.64	625.842	677.181	681.36	962.946	595.054	326.811	661.425	893.096	186.38	187.471	193.955	223.94	94.6919	269.988	0	28.8696	38.8693	21.4375	21.4375	0	56.4795	190.419	39.69	143.047	68.9552	87.5429
2021-10-29	Length	16.11	16.29	13.66	11.73	16.14	12.68	16.77	15.94	12.99	11.4	15.44	15.18	8.45	9.73	9.64	9.82	8.97	10.94	0	3.5	3.5	3.5	3.5	0	7.52	9.92	4.5	8.93	5.2	7.52
17	Width	11.57	13.21	11.77	10.74	11.42	11.04	10.66	11.07	10.38	10.23	11.18	13.22	8.22	6.9	6.95	6.37	5.32	9.59	0	3.5	3.5	3.5	3.5	0	5.56	8.46	4.2	8.25	5.2	6.95
	Volume	1078.28	1421.34	946.18	676.514	1052.46	772.729	952.835	976.683	699.8	596.522	964.941	1326.49	285.476	231.623	232.818	199.233	126.936	503.066	0	21.4375	21.4375	21.4375	21.4375	0	116.235	354.995	39.69	303.899	70.304	181.617
2021-10-31	Length			14.22	13.85		15.39			15.23	12.79			10.78	11.94	10.61	11.34	9.51	12.02	0	3.5	3.5	0	3.5	0	7.92	10.23	4.5	9.56	5	8.23
19	Width			12.96	12.21		13.24			13.05	12.03			9.4	8.45	8.13	7.93	6.43	11.74	0	3.5	3.5	0	3.5	0	5.98	7.95	4.5	8.69	5	7.01
	Volume			1194.21	1032.41		1348.92			1296.85	925.49			476.26	426.273	350.644	356.557	196.595	828.344	0	21.4375	21.4375	0	21.4375	0	141.611	323.281	45.5625	360.967	62.5	202.212
2021-11-02	Length			16.23	15.39						15.21			12.19	13.2	10.78	13.62	11.94	14.45	0	3.5	3.5	0	3.5	0	8.16	10.41	4.5	10.36	5	7.81
21	Width			14.69	15.21						12.83			10.41	9.4	8.93	8.65	7.89	14.21	0	3.5	3.5	0	3.5	0	6.27	7.87	4.5	9.23	5	7.03
	Volume			1751.19	1780.19						1251.85			660.504	583.176	429.825	509.541	371.645	1458.9	0	21.4375	21.4375	0	21.4375	0	160.397	322.382	45.5625	441.299	62.5	192.989
2021-11-04	Length													14.05	15.15	12.58	14.25	13.28	16.58	0	3.5	3.5	0	3.5	0	11.45	13.12	4.5	11.38	5	11.46
23	Width													11.55	11.48	9.34	10.13	9.25	15.34	0	3.5	3.5	0	3.5	0	7.32	9.13	4.5	10.96	5	8.88
	Volume													937.153	998.312	548.712	731.145	568.135	1950.77	0	21.4375	21.4375	0	21.4375	0	306.759	546.821	45.5625	683.492	62.5	451.836
2021-11-06	Length													15.67		14.34	15.78	15.13		0	3.77	4.2	0	0	0	13.28	15.23	5.23	12.33	5.5	12.19
25	Width													13.23		10.98	12.35	10.77		0	3.5	3.5	0	0	0	8.73	10.78	4.82	11.56	5.5	9.82
	Volume													1371.38		864.418	1203.4	877.486		0	23.0913	25.725	0	0	0	506.054	884.927	60.7527	823.851	83.1875	587.755
2021-11-08	Length															15.92				0	3.87	4.3	0	0	0	15.17		6.27	13.56	5.68	13.63
27	Width															12.45				0	3.5	3.6	0	0	0	9.33		5.52	12.11	5.67	10.48
	Volume															1233.82				0	23.7037	27.864	0	0	0	660.266		95.5247	994.301	91.3029	836.358
2021-11-10	Length																			0	4.25	4.82	0	0	0			6.98	15.17	5.93	15.23
29	Width																			0	4.23	4.75	0	0	0			5.92	13.86	5.8	11.25
	Volume																			0	38.0224	54.3756	0	0	0			122.312	1457.08	99.7426	963.773
2021-11-12	Length																			0	5.11	5.97	0	0	0			7.63		6.13
31	Width																			0	5.08	5.34	0	0	0			6.24		5.97
	Volume																			0	65.9354	85.1191	0	0	0			148.547		109.239
2021-11-14	Length																			0	5.72	7.53	0	0	0			9.87		7.23
33	Width																			0	5.7	6.98	0	0	0			7.28		6.84
	Volume																			0	92.9214	183.432	0	0	0			261.547		169.13
2021-11-16	Length																			0	6.51	9.1	0	0	0			12.12		8.91
35	Width																			0	6.31	8.78	0	0	0			8.31		7.99
	Volume																			0	129.601	350.752	0	0	0			418.48		284.408
2021-11-18	Length																			0	7.51	12.15	0	0	0			13.15		9.85
37	Width																			0	7.4	10.16	0	0	0			9.06		8.16
	Volume																			0	205.624	627.096	0	0	0			539.7		327.934
2021-11-20	Length																				9.28	14.28						15.72		10.26
39	Width																				8.27	12.58						11.23		8.52
	Volume																				317.343	1129.95						991.247		372.389
2021-11-22	Length																				11.8	15.55								11.39
41	Width																				9.39	13.65								8.99
	Volume																				520.215	1448.66								460.27
2021-11-24	Length																				12.95									11.58
43	Width																				10.52									9.23
	Volume																				716.591									493.267
2021-11-26	Length																				13.27									12.23
45	Width																				12.87									9.56
	Volume																				1099									558.872
2021-11-28	Length																				14.58									12.55
47	Width																				14.23									10.03
	Volume																				1476.17									631.271
2021-11-30	Length																				15.81									13.47
49	Width																				15.23									10.63
	Volume																				1833.59									761.034
2021-12-02	Length																													15.23
51	Width																													11.58
	Volume																													1021.14

## Sheet: Figure 2 CDE_3
		PBS+PBS+PBS+PBS												PBS+PBS+PBS+Clodronate												Control+EX/MPLA/α-IL10R+α-PD-1												Caerin+EX/MPLA/α-IL10R+α-PD-1
2021-12-20	No.	27	28	29	31	33	36	37	51	52	53	54	25	9	13	14	15	19	21	63	64	65	66	67	68	1	30	34	38	39	43	57	58	59	60	61	62	2	3	4	5	26	32	35	40	41	42	44	45
2021-12-23	Length	3.52	3.25	3.58	3.58	3.42	3.43	3.47	3.35	3.52	3.43	3.49	3.78	3.26	3.42	3.53	3.43	3.67	3.15	3.34	3.43	3.21	3.45	3.62	3.23	3.17	3.35	3.58	3.22	3.35	3.28	3.36	3.25	3.57	3.23	3.55	3.42	3.18	3.32	3.58	3.23	3.63	3.32	3.22	3.324	3.26	3.22	3.21	3.38
3	Width	3.22	3.21	3.2	3.18	3.16	3.32	3.03	3.21	3.18	3.25	3.26	3.13	3.17	3.25	3.17	3.26	3.42	3.03	3.21	3.52	3.03	3.23	3.13	3.15	3.05	3.18	3.21	3.13	3.15	3.03	3.05	3.14	3.25	3.03	3.24	3.33	3.03	3.03	3.09	3.18	3.25	3.25	3.17	3.19	3.05	3.09	3.19	3.29
	Volume
2021-12-25	Length	5.13	4.03	5.21	4.67	3.99	5.22	3.79	5.26	5.37	4.28	4.26	5.22	4.28	4.28	5.26	5.29	3.72	4.53	4.53	5.13	4.28	5.26	5.82	4.37	4.81	3.62	5.31	4.22	3.75	4.14	4.82	4.53	5.62	4.82	3.75	3.95	4.28	3.82	4.08	3.52	3.68	3.83	4.25	4.22	3.85	3.86	3.98	3.92
5	Width	4.37	3.82	3.79	3.82	3.85	4.86	3.63	4.89	4.26	4.25	3.78	3.72	3.82	3.72	4.34	4.52	3.56	3.98	3.36	4.28	3.52	4.33	4.53	3.82	3.58	3.58	3.95	3.56	3.61	4.09	3.36	3.72	3.73	3.25	3.33	3.75	3.56	3.13	3.53	3.24	3.29	3.73	3.46	3.78	3.12	3.37	3.23	3.43
	Volume
2021-12-27	Length	6.27	5.83	6.48	6.64	6.45	6.35	5.53	6.78	6.26	5.23	5.78	6.62	6.23	6.52	7.83	7.26	6.73	6.25	6.23	7.13	6.11	7.23	7.52	6.52	5.91	4.78	7.34	5.49	4.99	5.89	5.39	5.67	7.29	5.47	5.13	4.95	5.62	4.21	4.83	4.28	3.78	4.83	5.81	5.23	4.26	4.75	5.23	5.32
7	Width	4.57	3.21	4.47	4.49	4.71	5.25	4.67	5.26	5.09	4.78	4.53	4.92	4.92	4.83	5.73	5.33	4.93	4.89	4.82	5.21	4.93	5.03	5.25	4.88	3.98	4.67	4.78	4.62	4.12	4.58	3.89	4.23	4.77	3.78	3.92	4.23	4.38	3.28	4.21	3.32	3.36	4.21	4.26	4.28	3.23	3.98	3.28	3.83
	Volume
2021-12-29	Length	8.94	6.78	8.92	8.23	7.93	8.29	7.56	8.77	7.78	7.26	7.89	8.93	8.82	8.87	9.38	9.46	8.67	8.58	7.89	9.67	7.93	8.93	9.82	8.53	6.26	5.67	7.93	6.26	6.78	6.67	6.78	6.67	7.94	6.25	6.72	5.52	5.4	4.32	5.23	4.45	4.23	5	5.5	5.2	4.28	4.82	5.1	5
9	Width	5.75	4.92	6.78	6.56	6.28	6.75	7.26	6.26	6.92	5.67	6.27	6.67	5.93	5.92	6.39	6.89	6.26	5.78	5.92	7.26	6.34	6.78	7.33	6.53	4.83	5.38	5.13	5.77	5.26	5.37	4.92	5.21	5.31	4.78	4.93	5.25	5	3.52	4.82	3.83	4.2	4.3	4.2	4.3	4.1	3.99	3.5	3.8
	Volume
2021-12-31	Length	12.25	8.83	11.43	10.88	9.2	9.21	9.77	12.72	9.78	9.67	9.66	12.98	10.78	10.63	12.78	12.66	10.36	10.37	8.25	11.82	8.34	10.25	11.93	10.25	7.42	7.56	8.55	7.99	8.49	7.97	7.72	7.63	8.56	7.33	8.38	6.67	5.2	4.39	6.34	4.86	5.02	5.1	5.1	4.5	4.3	4.9	4.5	4.6
11	Width	7.21	6.52	8.31	7.52	7.78	7.95	9.42	8.78	10.27	9.87	9.67	9.89	7.26	6.93	8.96	8.89	8.26	8.78	7.82	8.85	7.36	8.25	8.95	8.03	5.36	7.02	5.32	7.55	6.53	6.13	5.36	6.65	6.78	5.26	6.03	6.65	5.2	3.7	5.31	4.21	4.61	5.1	4.1	4.5	4.2	4.1	4.5	3.6
	Volume
2022-01-02	Length	14.65	10.32	14.62	12.77	11.56	11.16	11.79	14.27	12.79	11.29	11.38	14.26	12.67	12.77	14.65	13.95	12.63	12.73	9.55	13.27	9.25	12.46	13.78	12.03	7.45	8.75	10.66	8.34	11.39	9.45	8.93	8.95	10.23	8.96	10.78	8.93	4.5	4.5	6.65	5.3	4.62	5	5	4.6	4.3	4.9	4.5	4.8
13	Width	9.66	8.12	10.16	8.56	9.38	9.69	11.41	10.78	10.27	9.87	9.67	9.89	9.38	8.02	10.23	10.26	10.23	10.53	8.38	10.23	8.05	10.22	10.72	10.05	5.68	7.95	6.8	8.12	8.56	7.43	6.77	7.34	7.75	6.27	7.77	7.34	4.5	4	5.58	4.7	3.9	5	5	4.6	4.3	4.9	4.5	4
	Volume
2022-01-04	Length	15.98	12.16	15.95	14.28	12.78	13.18	13.26	15.93	14.82	13.67	13.56	15.87	14.53	14.02	16.77	15.47	15.26	14.24	11.83	15.66	11.63	14.37	15.83	13.95	7.95	9.78	11.05	8.78	12.34	9.97	10.13	10.26	11.78	9.37	12.03	10.02	3.5	3	6.82	6.3	4.5	4.5	3.5	4	3.5	4.5	4	4.6
15	Width	10.78	9.28	11.78	9.78	10.28	10.16	12.17	12.13	12.73	11.33	11.85	11.26	11.67	10.13	12.75	12.37	12.77	12.76	9.67	12.77	9.28	12.34	12.89	12.11	5.53	8.26	7.23	8.52	9.57	8.03	7.92	8.69	8.86	7.52	8.69	9.82	3.5	3	6.13	5.7	4.5	4.5	3.5	4	3.5	4.5	4	4
	Volume
2022-01-06	Length		13.49		16.21	14.63	15.19	15.34		15.96	15.93	15.78		16.62	15.78				16.77	13.25		13.05	15.96		15.25	8.44	11.33	11.96	9.42	13.62	10.61	11.26	11.53	12.67	10.28	13.56	11.75	3.5	3	7.6	7.3	3.5	3.9	3.5	4	3.5	4.5	4	4.6
17	Width		10.94		10.74	11.82	12.61	14.28		14.28	13.56	13.26		13.32	12.77				14.13	11.26		11.05	13.28		13.33	5.32	9.69	8.01	9.02	10.55	8.88	8.83	9.78	9.63	8.67	9.93	10.66	3.5	3	7.2	6.1	3	3.8	3.5	4	3.5	4.5	4	4.25
	Volume
2022-01-08	Length		15.28			15.67														15.36		15.45				10.26	12.98	13.26	11.58	14.63	11.95	12.34	12.65	13.78	11.67	14.67	13.67	3.5	0	9.38	8.72	3.65	4.2	3.1	0	0	3.92	0	4.78
19	Width		11.26			12.16														13.22		13.45				5.97	12.37	9.72	10.77	11.57	9.78	9.67	10.26	10.25	9.34	10.23	11.78	3.5	0	8.53	7.36	3.27	4.1	3	0	0	3.23	0	4.63
	Volume
2022-01-10	Length																									12.06	14.36	15.72	13.04	16.55	13.26	13.89	13.56	14.53	13.25	15.73	15.23	0		10.63	10.87	3.9	4.24	3.1			3.76		5.29
21	Width																									6.93	14.27	10.71	11.84	12.22	11.16	10.73	11.78	11.66	10.26	11.67	12.93	0		10.43	8.85	3.7	4.2	3			3		5.17
	Volume
2022-01-12	Length																									12.78	15.28		13.34		14.15	14.52	14.67	15.73	14.23					11.66	11.71	5.15	5.41	3.19			3.5		6.66
23	Width																									8.16	15.06		12.79		11.94	11.26	12.79	11.67	11.73					11.1	10.67	4.59	5.09	3.15			3		6.23
	Volume
2022-01-14	Length																									13.79			14.26		15.27	15.62	15.78		15.67					12.38	12.34	6.27	6.74	4.58			4.25		7.83
25	Width																									9.27			13.56		12.95	12.77	13.67		12.98					12.13	10.92	5.28	5.33	3.75			4.2		7.23
	Volume
2022-01-16	Length																									15.23			15.28											13.16	13.17	6.93	6.92	5.66			4.89		8.26
27	Width																									10.78			14.32											12.53	11.07	5.92	5.95	4.26			4.53		7.85
	Volume
2022-01-18	Length																																							13.78	13.38	7.53	7.53	6.13
29	Width																																							13.21	11.53	6.32	7.22	4.83
	Volume
2021-01-20	Length																																							14.25	13.95	8.26	7.94	7.52
31	Width																																							13.92	11.98	6.95	7.38	5.67
	Volume
2021-01-22	Length																																							14.78	14.15	9.03	8.25	8.03
33	Width																																							14.13	12.23	7.25	8.03	6.83
	Volume
2021-01-24	Length																																					无	无	15.55	14.53	9.58	8.67	8.45	无	无		无
35	Width																																							14.26	12.75	7.74	8.23	7.53
	Volume
2021-01-26	Length																																								15.43	10.27	9.26	9.23			8.26		11.78
37	Width																																								12.93	8.37	9.13	8.16			7.22		10.67
	Volume
2021-01-28	Length
39	Width
	Volume
2021-01-30	Length
41	Width
	Volume
2022-02-01	Length
43	Width
	Volume
2022-02-03	Length
45	Width
	Volume
2022-02-05	Length
47	Width
	Volume
2022-02-07	Length
49	Width
	Volume
2022-02-09	Length
51	Width
	Volume
2022-02-11	Length																																									15.31	14.67	13.76			14.58		16.52
53	Width																																									13.38	12.18	11.78			13.17		14.23
	Volume
2022-02-13	Length																																										15.33	14.53			15.27
55	Width																																										12.75	12.05			14.36
	Volume
2022-02-15	Length																																											15.34
57	Width																																											12.33
	Volume
[truncated: 12 more columns]

## Sheet: rechallenge
		PBS+PBS+PBS						Caerin+EX/MPLA/α-IL10R+α-PD-1
2021-12-02	No.	181	182	183	184	185	186	80	83	84	85	17	47	Day51
2021-12-05	Length	3.12	3.32	。3.18	3.31	3.53	3.23
3	Width	3.02	3.1	3.12	3.18	3.25	3.18
	Volume
2021-12-07	Length	4.15	4.58	4.52	4.63	4.65	4.53
5	Width	3.15	3.52	3.38	3.52	3.78	3.92
	Volume
2021-12-09	Length	5.67	6.78	5.79	6.89	6.78	6.18
7	Width	3.42	4.28	4.25	4.58	4.67	4.72
	Volume
2021-12-11	Length	6.17	8.65	7.25	8.75	8.72	8.01
9	Width	5.62	5.36	5.23	5.67	5.75	5.78
	Volume
2021-12-13	Length	7.52	10.6	8.83	10.62	10.23	9.85
11	Width	6.31	6.31	6.23	6.72	6.68	7.23
	Volume
2021-12-15	Length	9.82	12.58	10.73	13.52	12.46	11.37
13	Width	8.35	8.72	8.34	8.73	8.56	9.26
	Volume
2021-12-17	Length	11.53	14.62	12.78	15.26	14.73	13.25
15	Width	10.76	10.15	10.26	10.62	12.76	11.38
	Volume
2021-12-19	Length	13.72	16.75	14.62		15.78	15.67
17	Width	12.53	12.28	10.15		13.98	13.22
	Volume
2021-12-21	Length	15.68		16.52
19	Width	14.66		14.05
	Volume
